# Supplementary material for: Comparison of GRACE data and groundwater levels for the assessment of groundwater depletion in Jordan
Source: Springer Nature journal article supplement (doi:10.1007/s10040-016-1416-9), 2016-04-26

# **Hydrogeology Journal – Electronic Supplementary Material**

## **Comparison of GRACE data and groundwater levels for the assessment of groundwater depletion in Jordan**

Tanja Liesch, Marc Ohmer

*Karlsruhe Institute of Technology, Institute of Applied Geosciences, Division of Hydrogeology*

### **Corresponding author:**

Tanja Liesch, Karlsruhe Institute of Technology, Institute of Applied Geosciences, Division of Hydrogeology, Kaiserstr. 12, 76131 Karlsruhe, Germany (tanja.liesch@kit.edu)

## Comparison of TRMM 3B34 and MERRA precipitation data

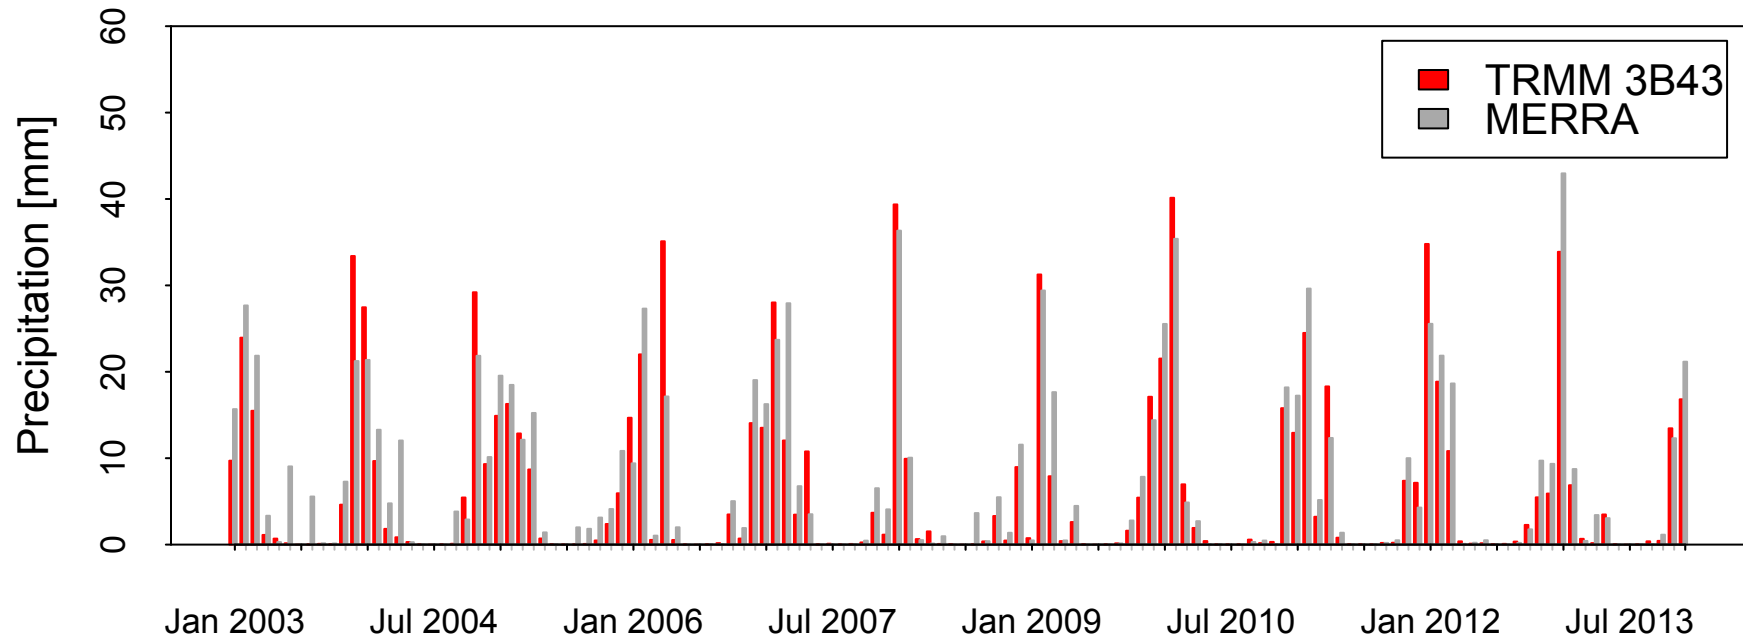

GRACE TWS, SM, AR, and GWS data, Azraq basin

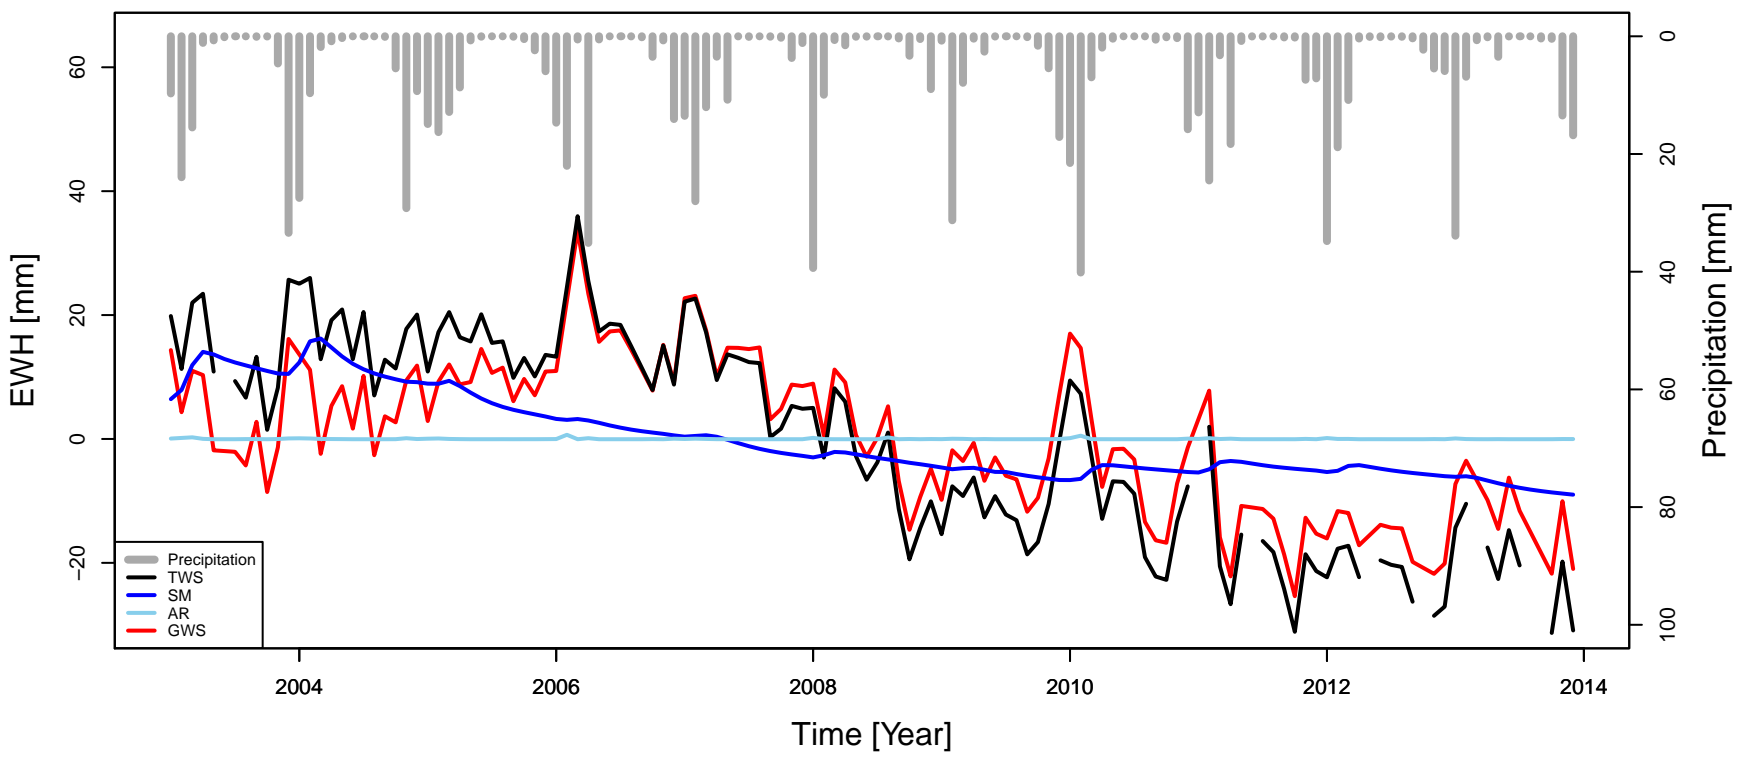

GRACE TWS, SM, SW, and GWS data, Amman-Zarqa basin

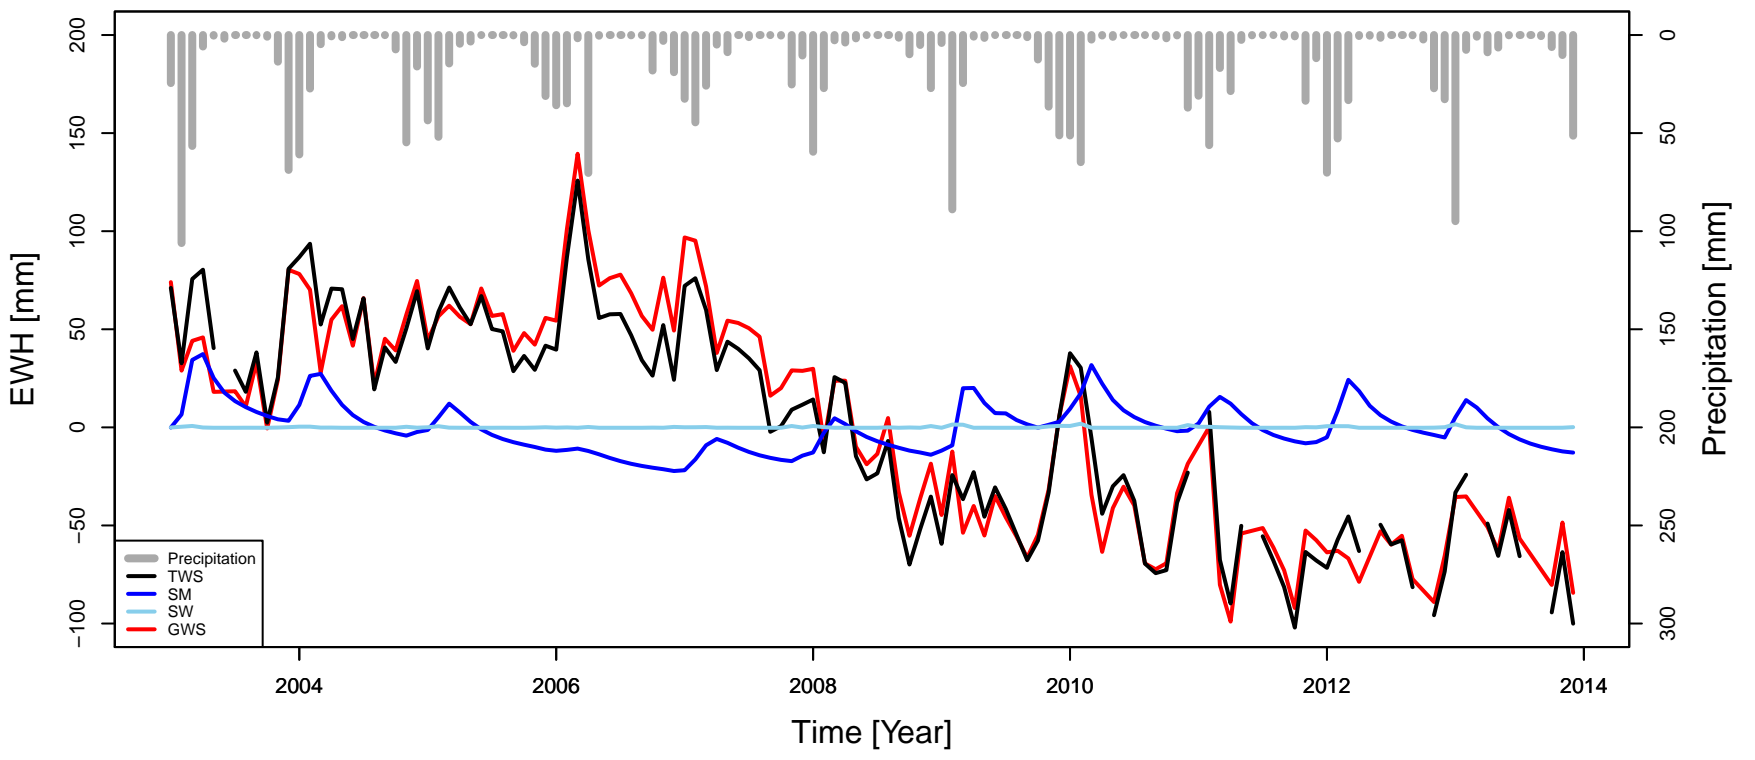

GRACE TWS, SM, SW, and GWS data, Dead Sea basin

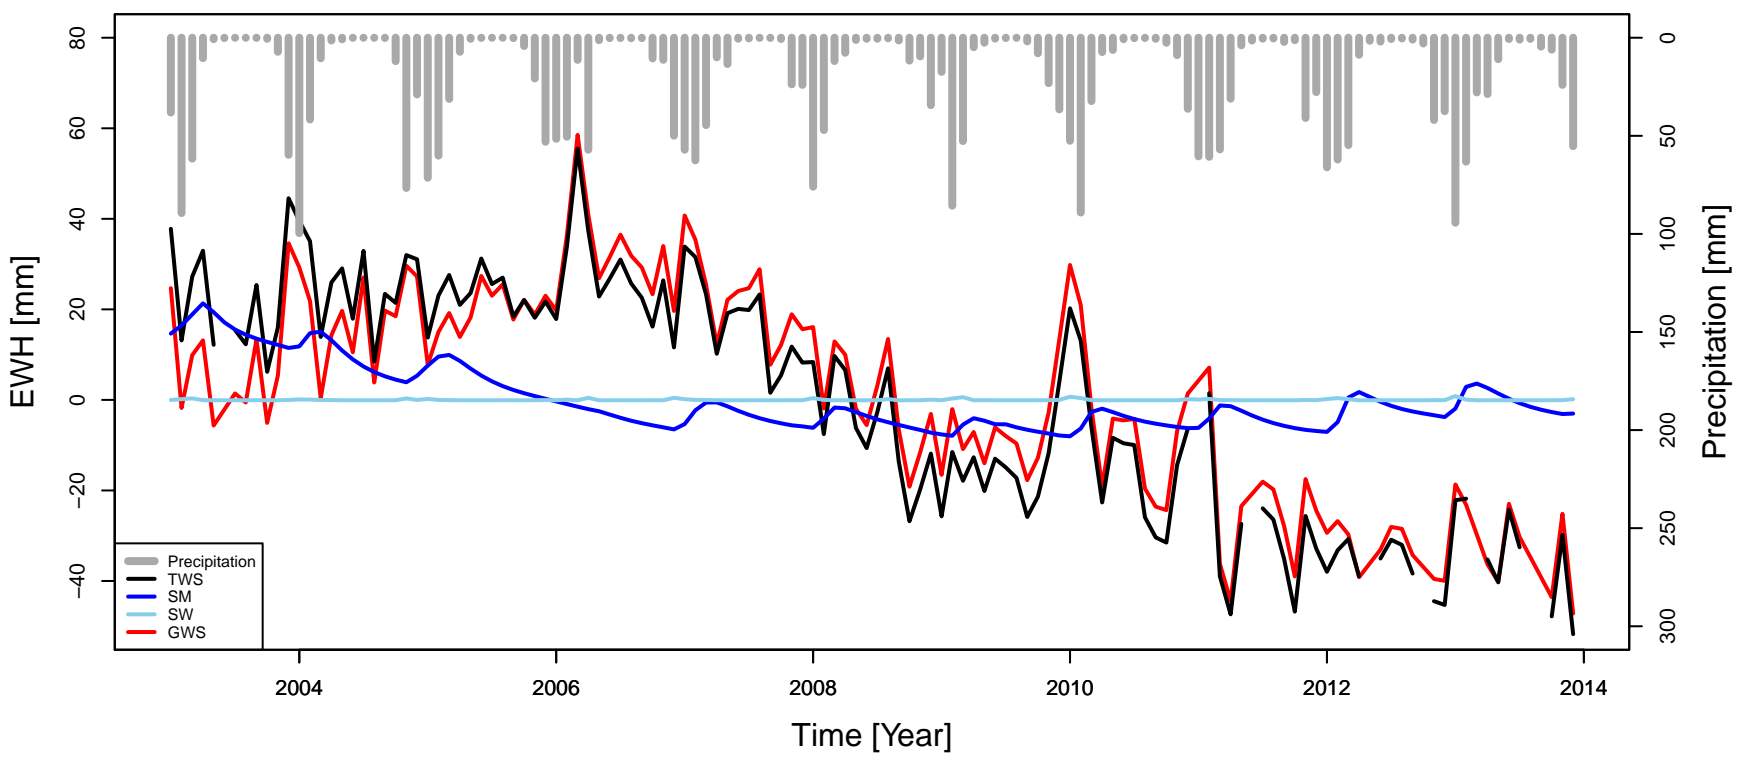

GRACE TWS, SM, SW, and GWS data, Side Wadis basin

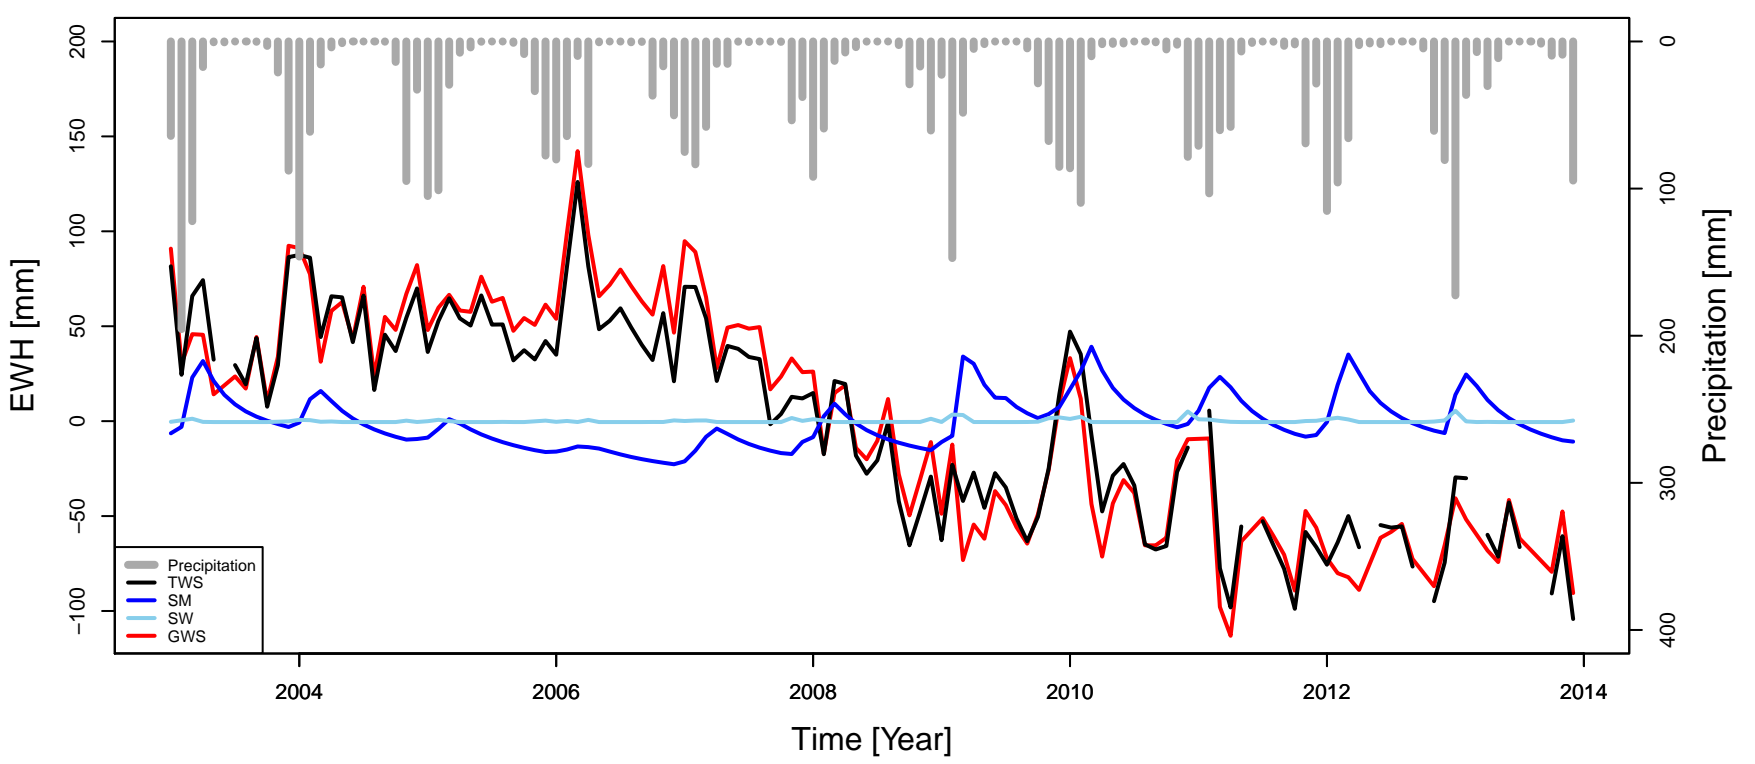

GRACE TWS, SM, SW, and GWS data, Yarmouk basin

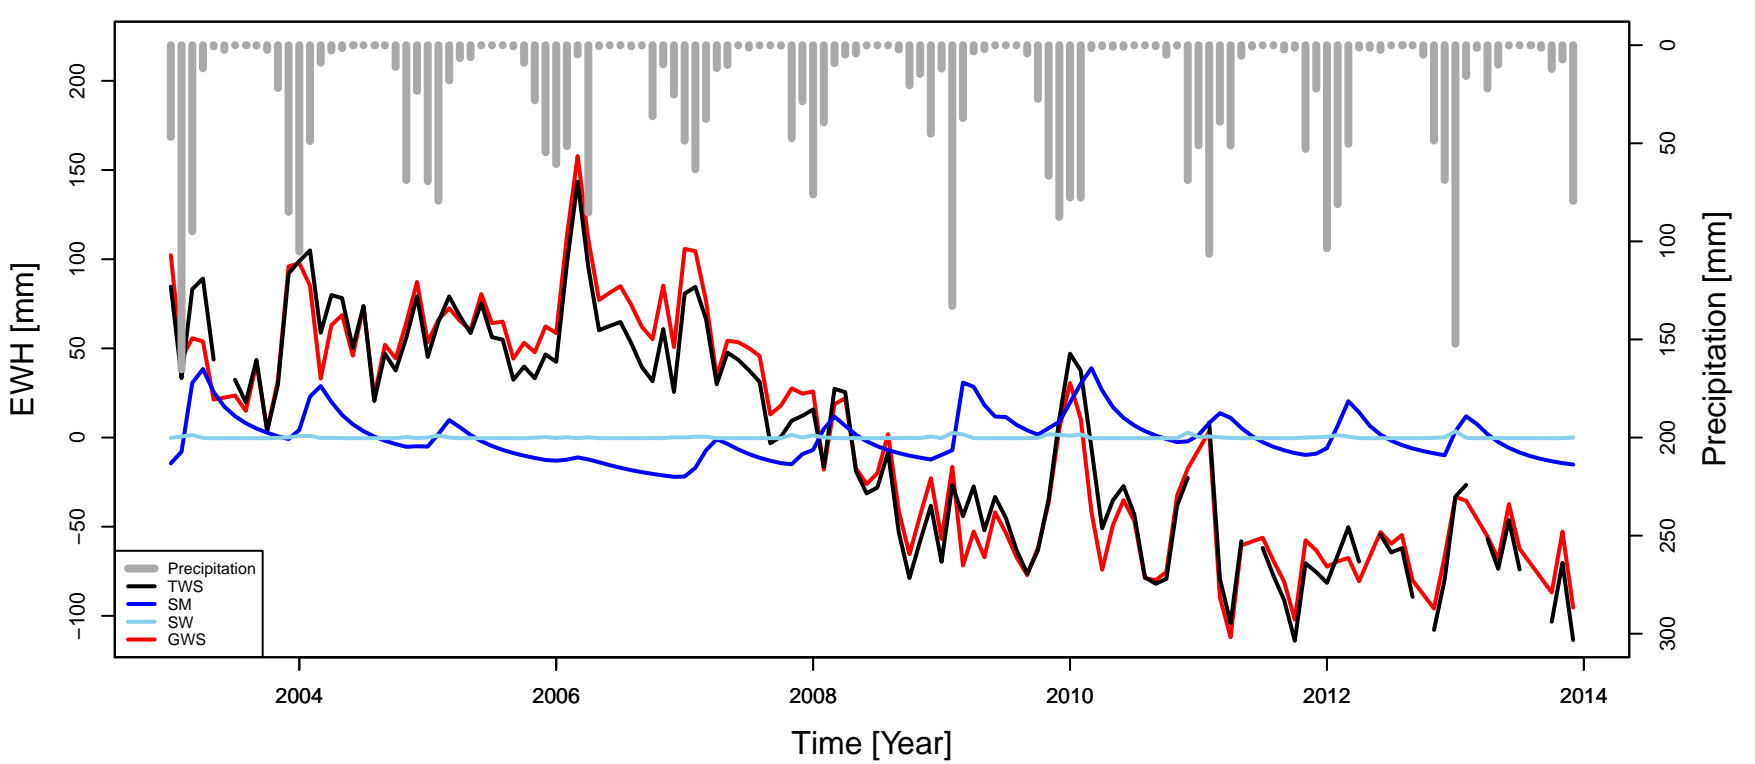

Correlation of GRACE GWS and adjusted GWL for AR1 – AR4

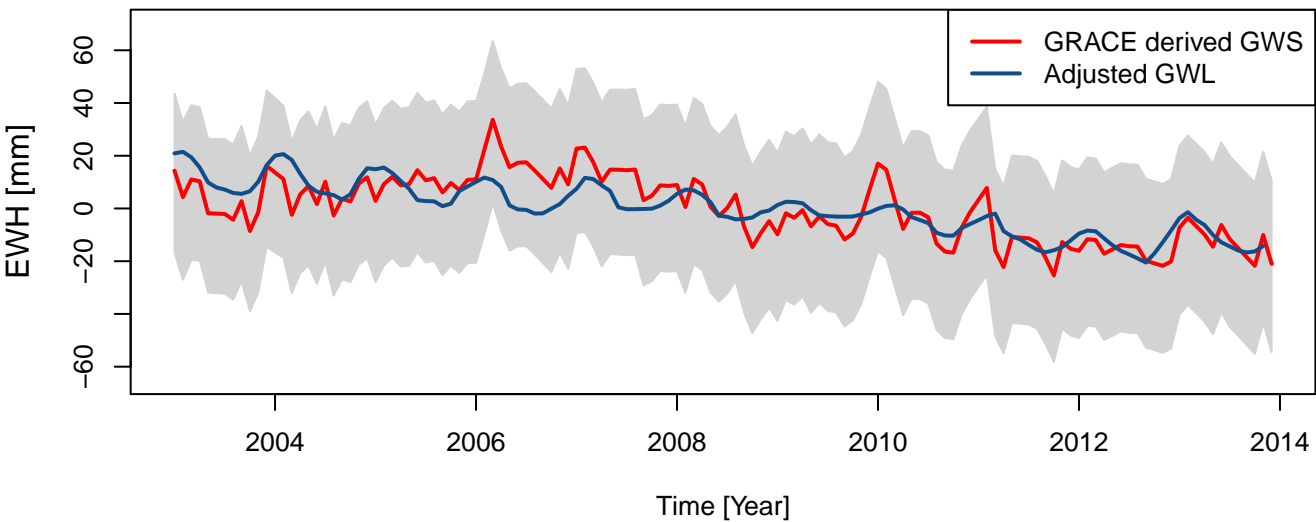

Distribution of p-values

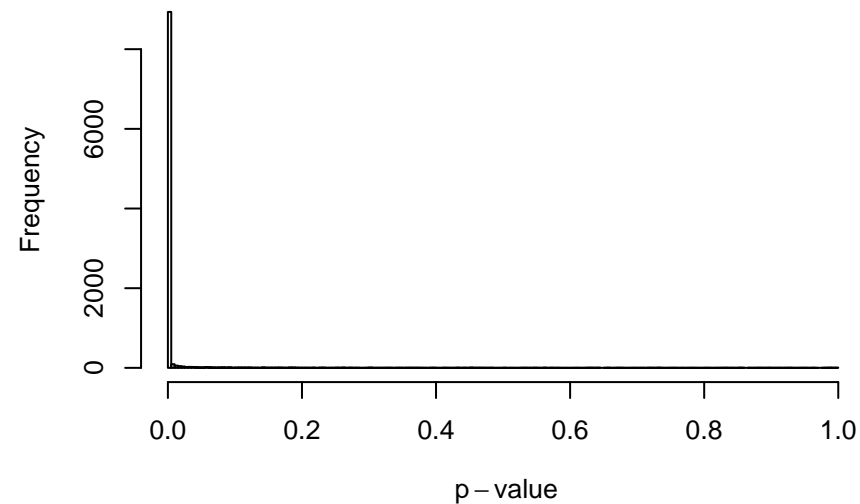

Distribution of  $R^2$  values

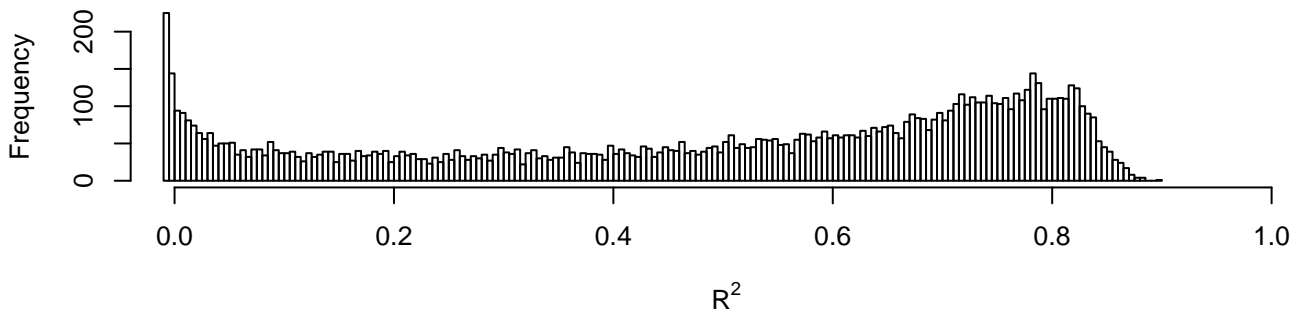

Distribution of mean residuals

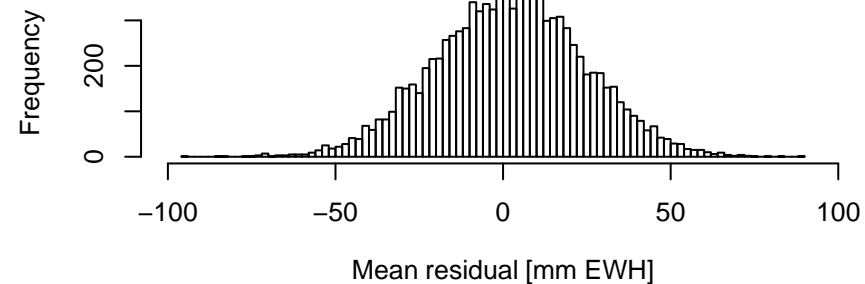

Correlation of GRACE GWS and adjusted GWL for AR5

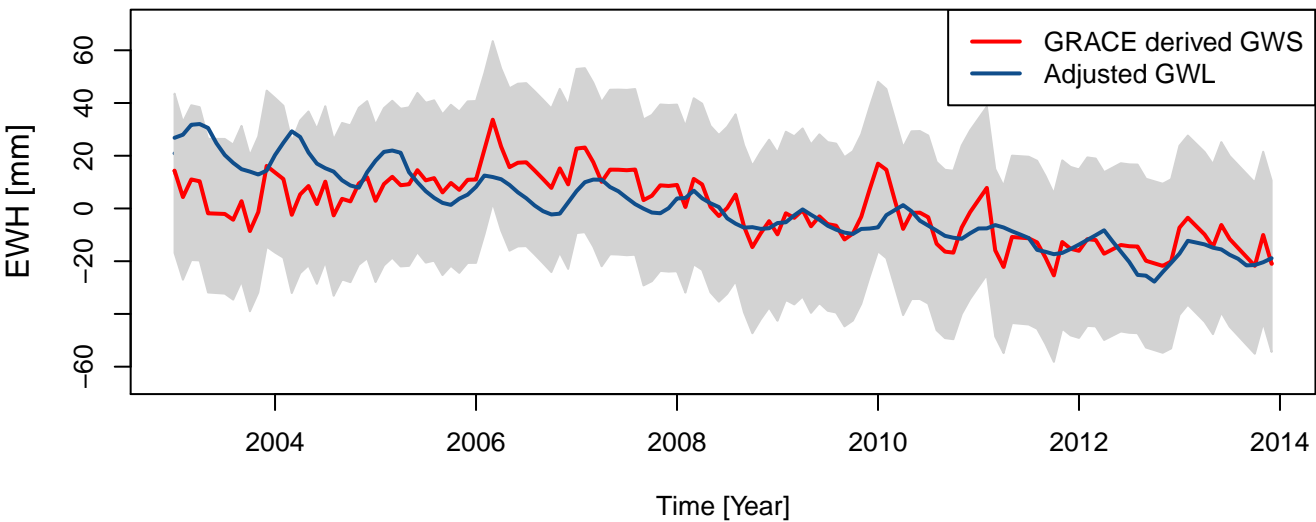

Distribution of p-values

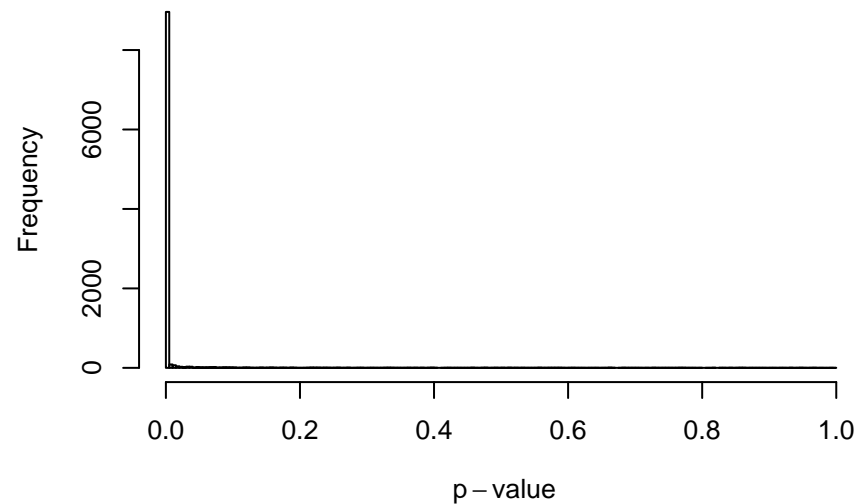

Distribution of  $R^2$  values

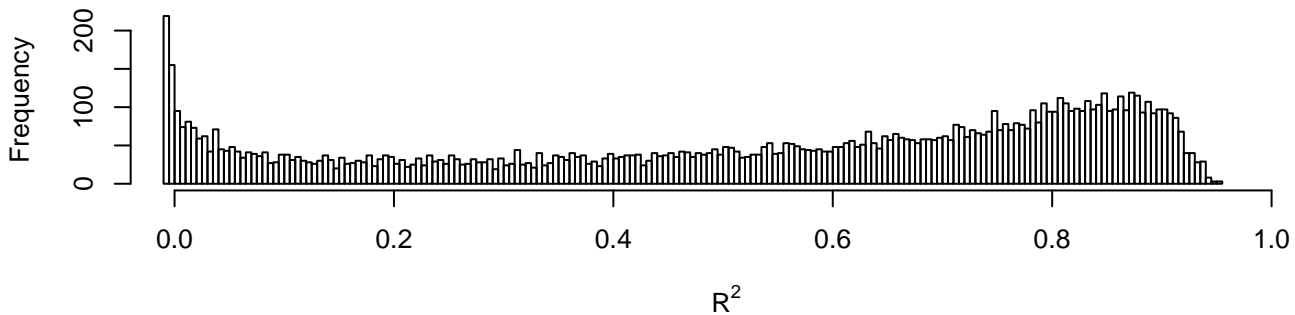

Distribution of mean residuals

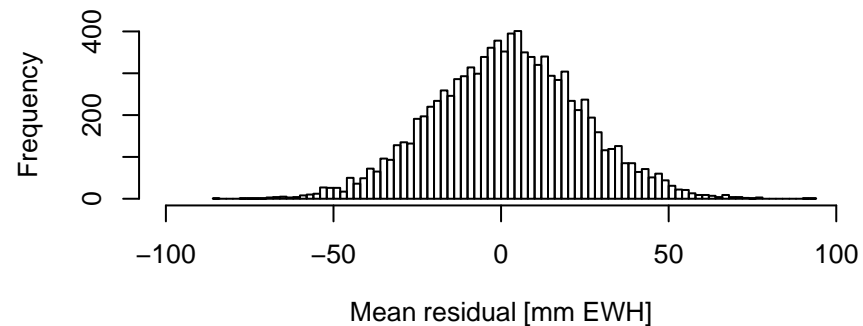

Correlation of GRACE GWS and adjusted GWL for AZ1 – AZ7

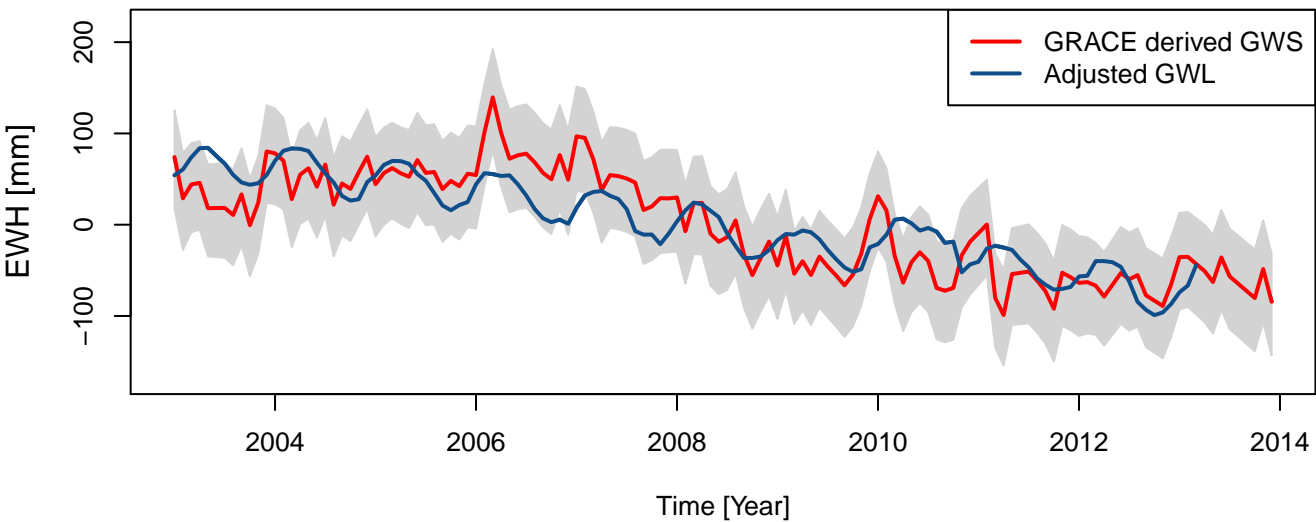

Distribution of p-values

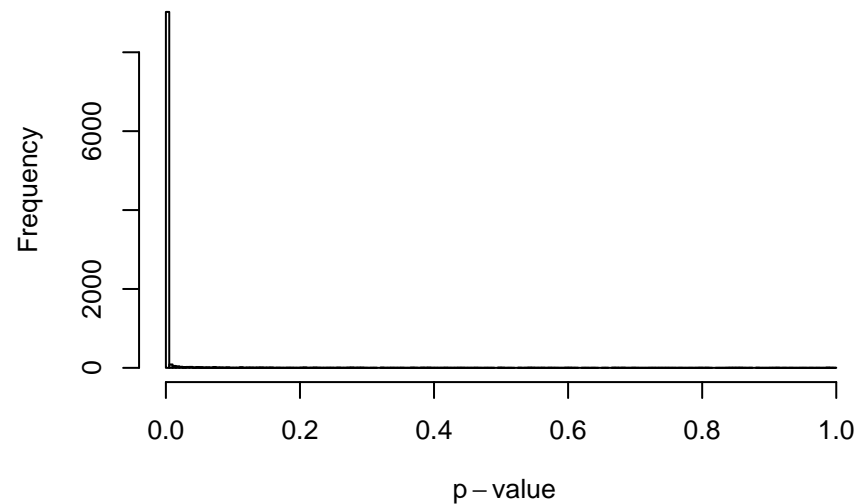

Distribution of  $R^2$  values

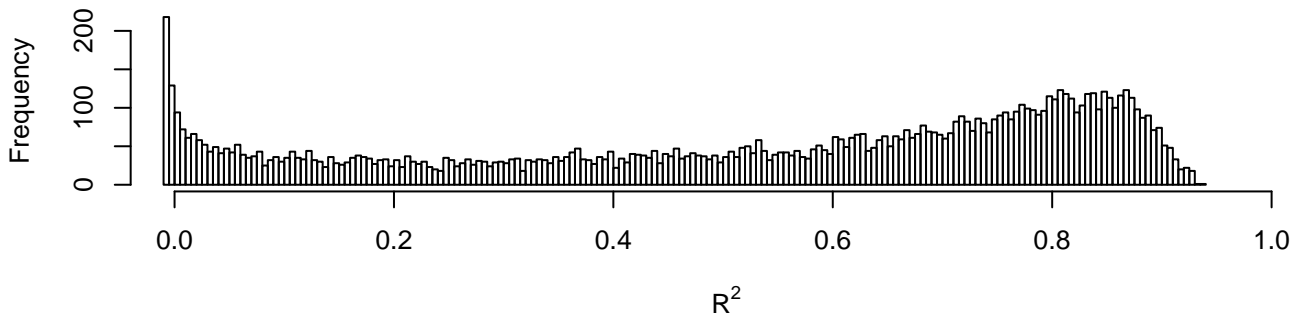

Distribution of mean residuals

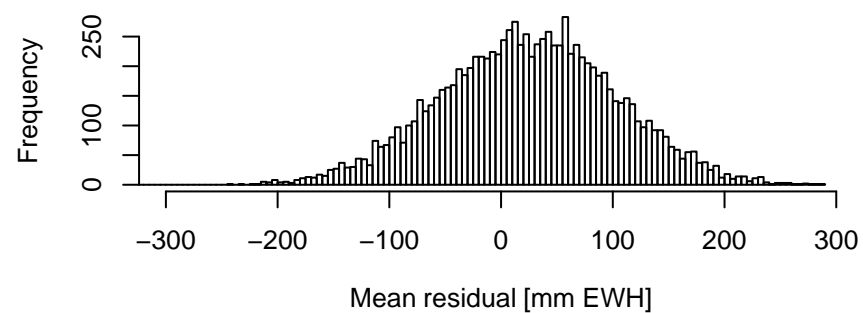

Correlation of GRACE GWS and adjusted GWL for AZ8

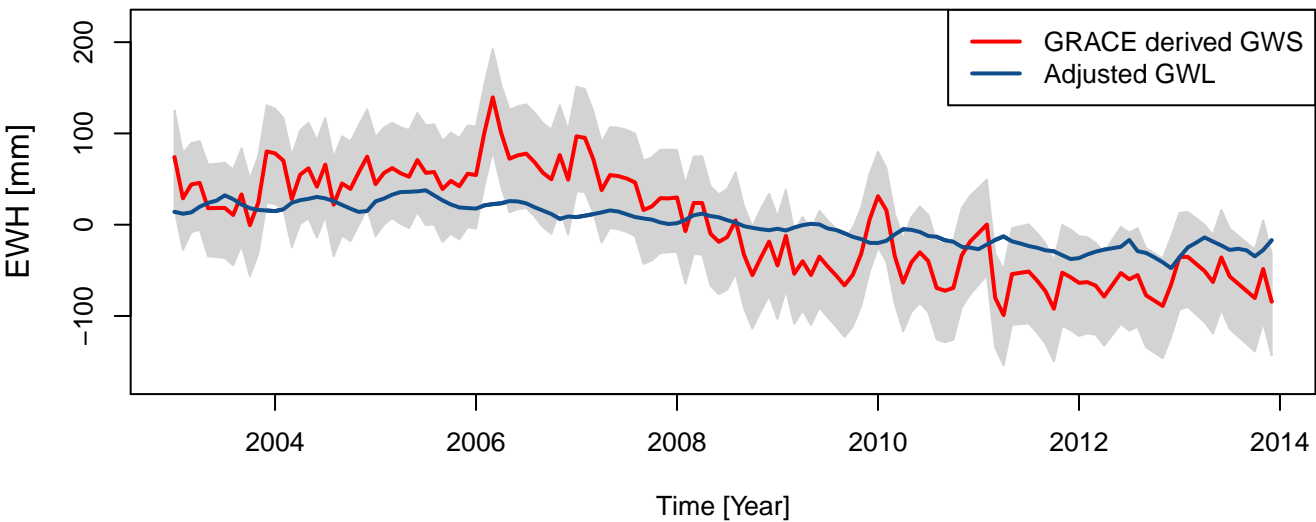

Distribution of p-values

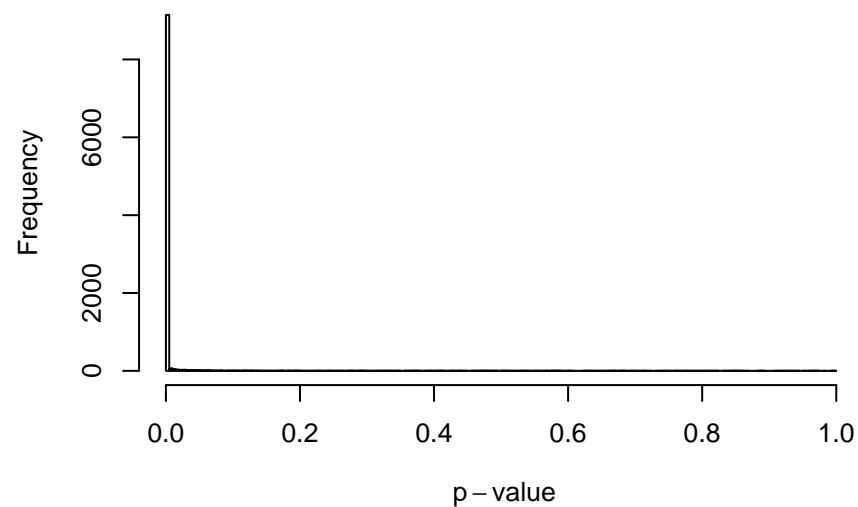

Distribution of  $R^2$  values

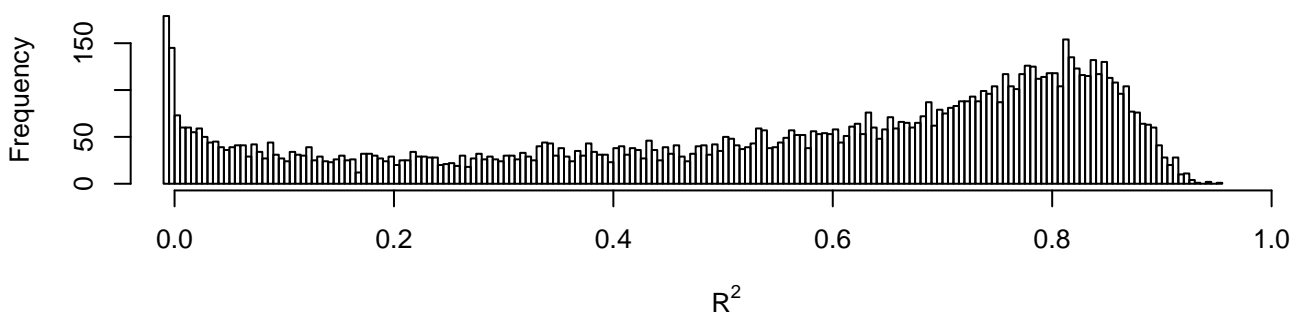

Distribution of mean residuals

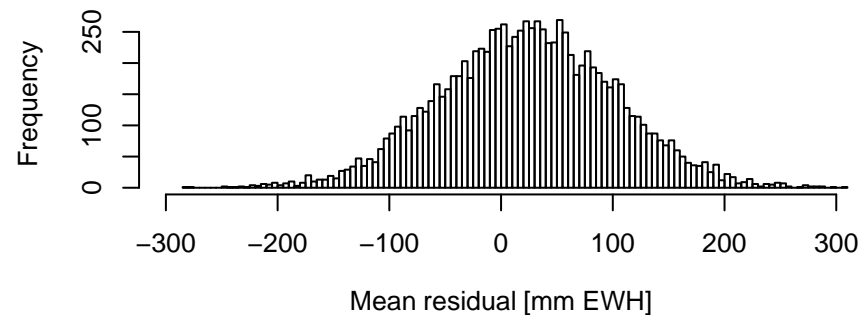

Correlation of GRACE GWS and adjusted GWL for DS1 – DS3

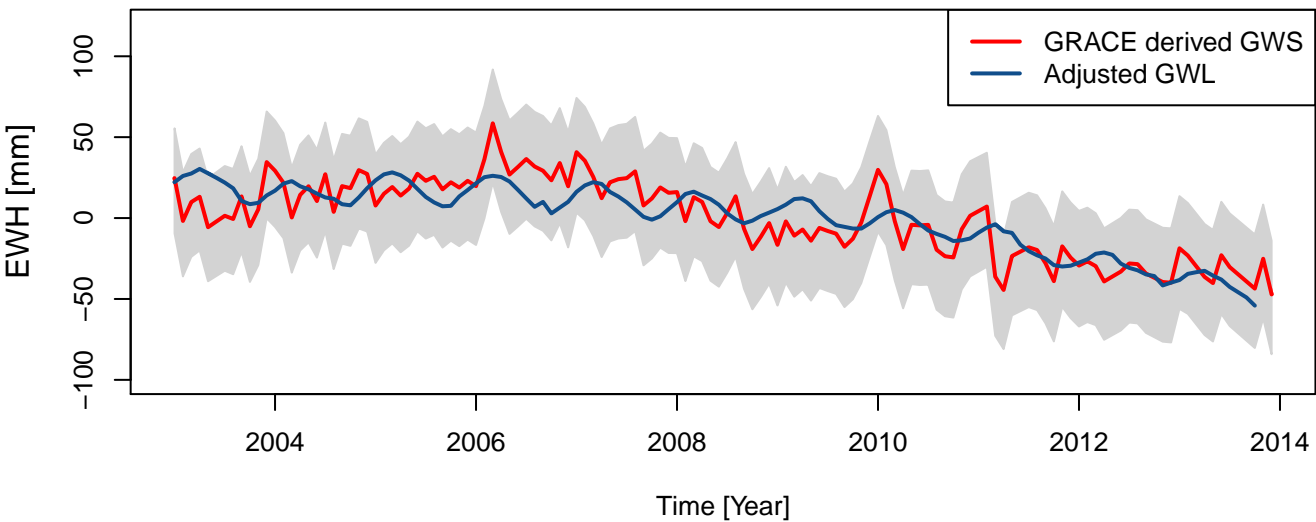

Distribution of p – values

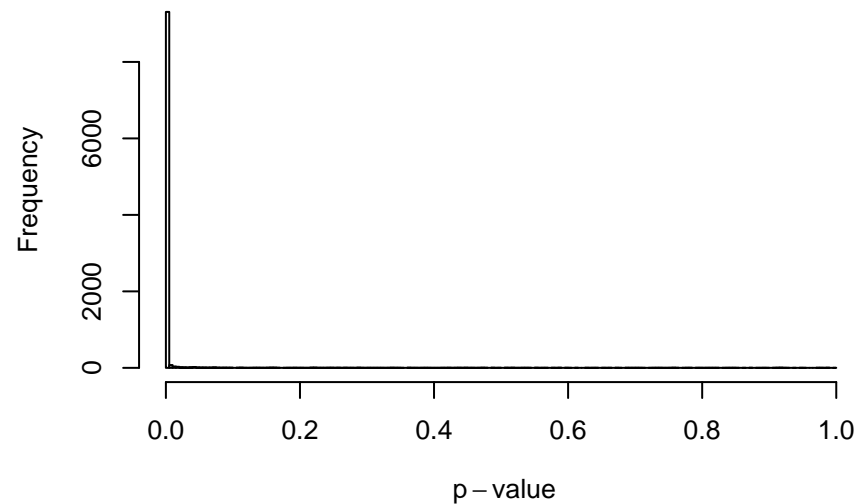

Distribution of  $R^2$  values

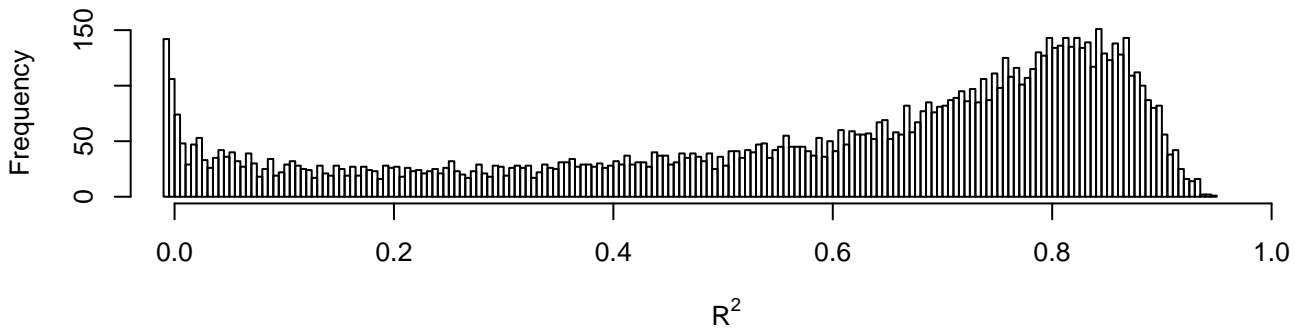

Distribution of mean residuals

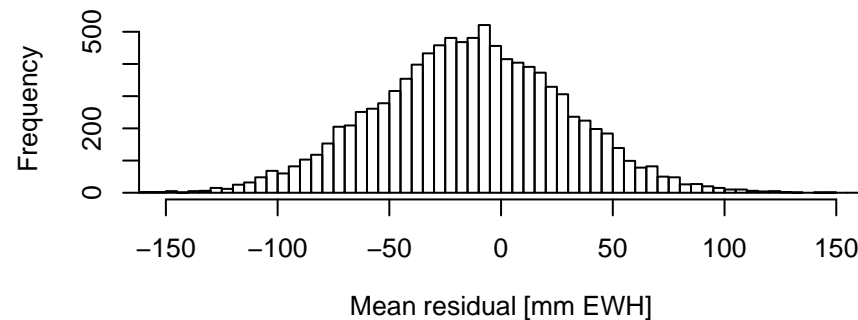



Correlation of GRACE GWS and adjusted GWL for DS4

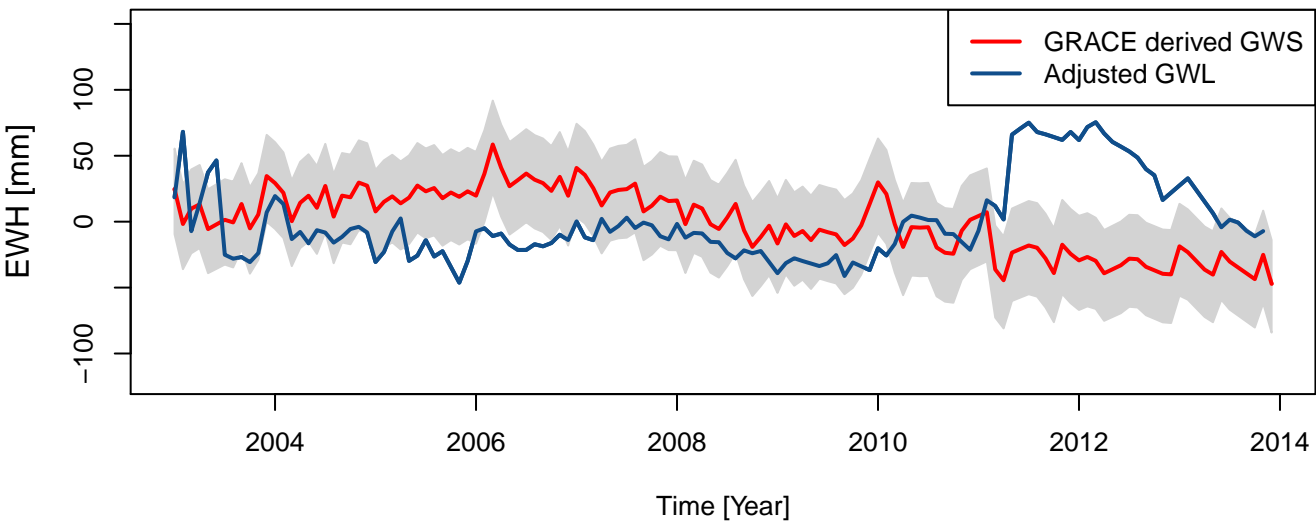

Distribution of p-values

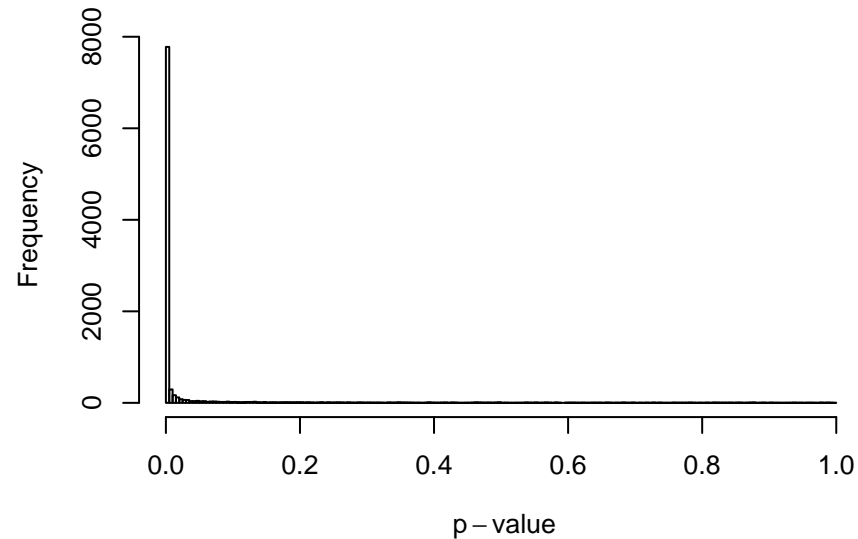

Distribution of  $R^2$  values

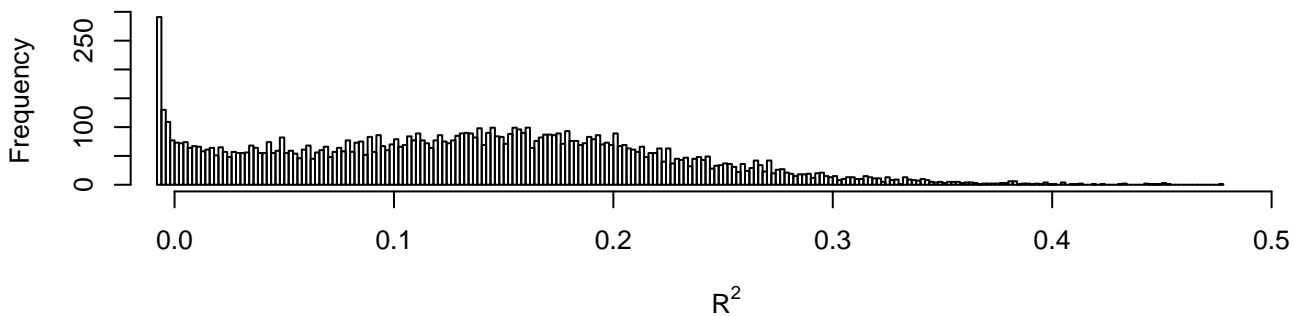

Distribution of mean residuals

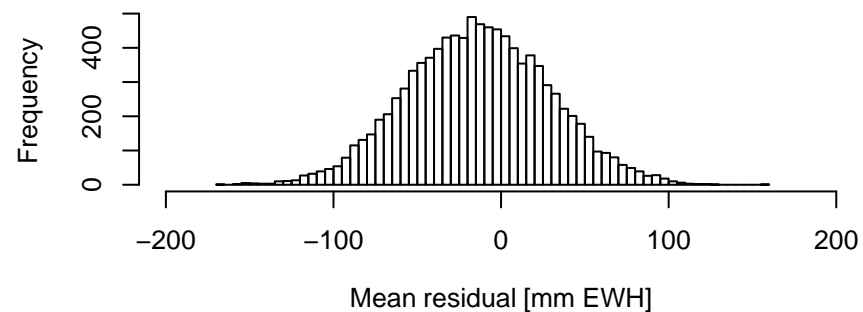

Correlation of GRACE GWS and adjusted GWL for SW1

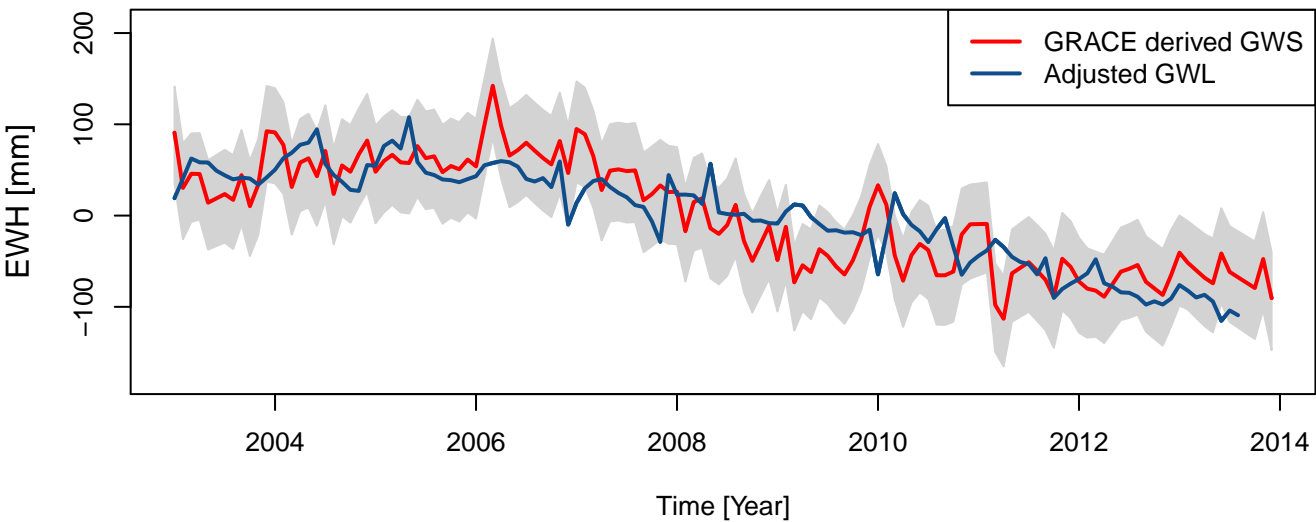

Distribution of p-values

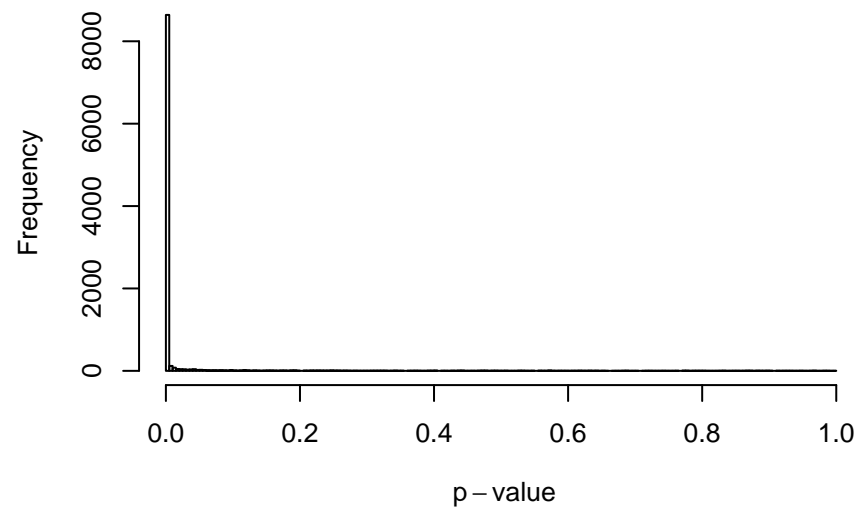

Distribution of  $R^2$  values

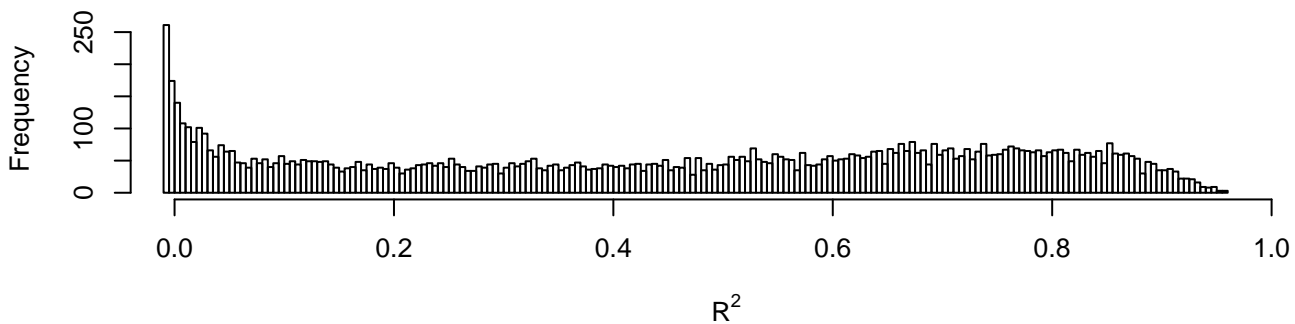

Distribution of mean residuals

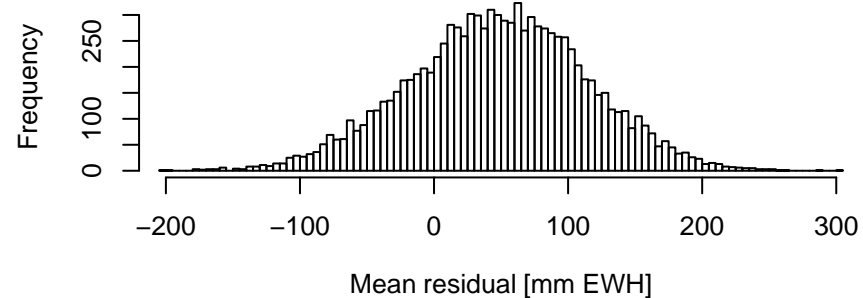

Correlation of GRACE GWS and adjusted GWL for SW2

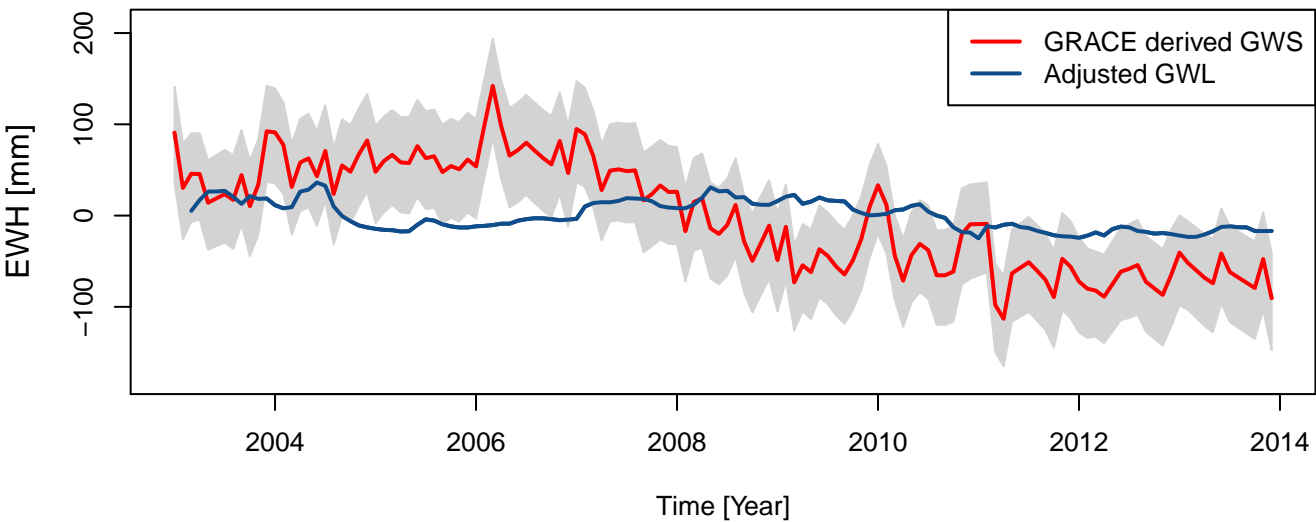

Distribution of p-values

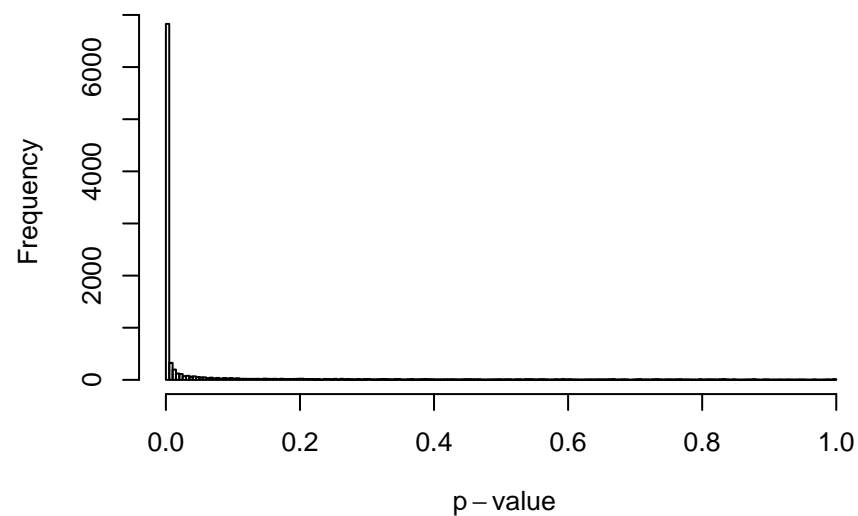

Distribution of  $R^2$  values

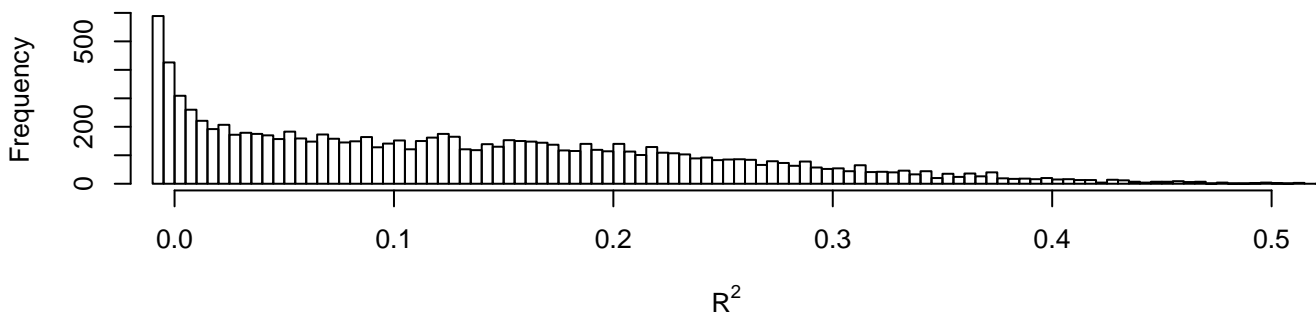

Distribution of mean residuals

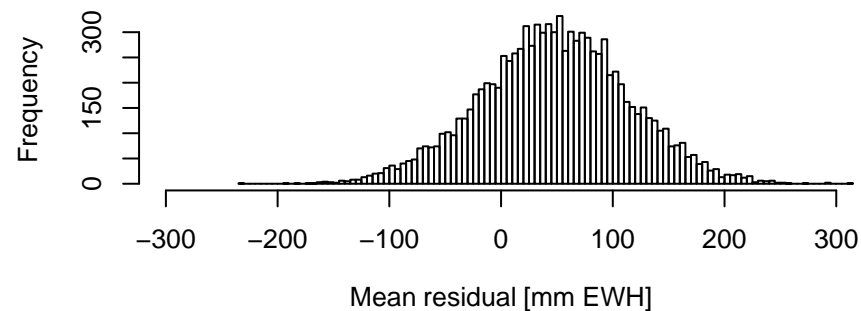

Correlation of GRACE GWS and adjusted GWL for YM1 – YM2

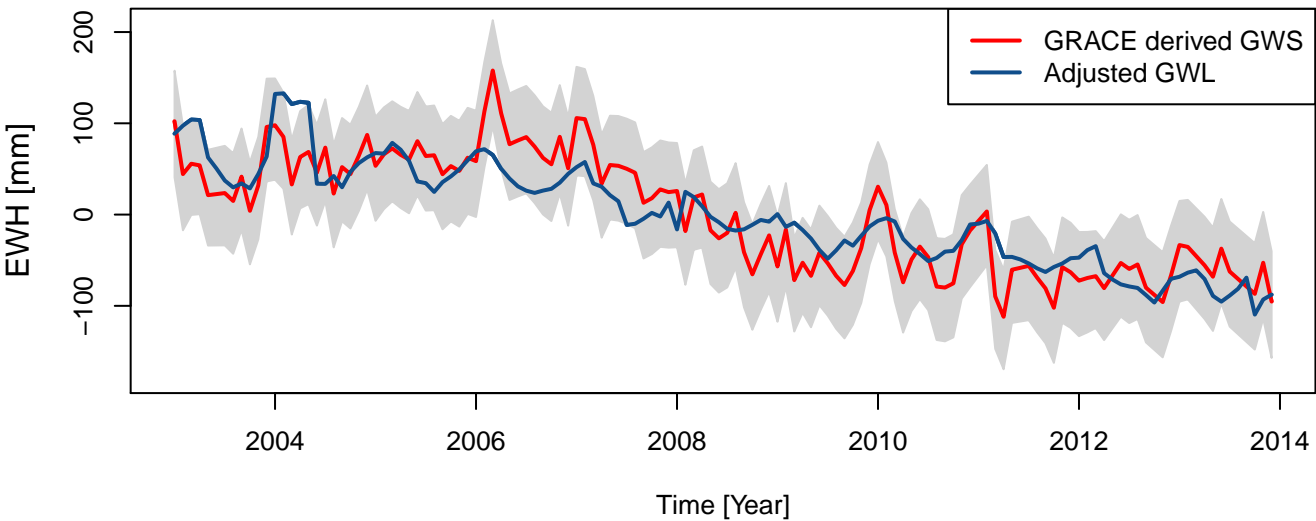

Distribution of p – values

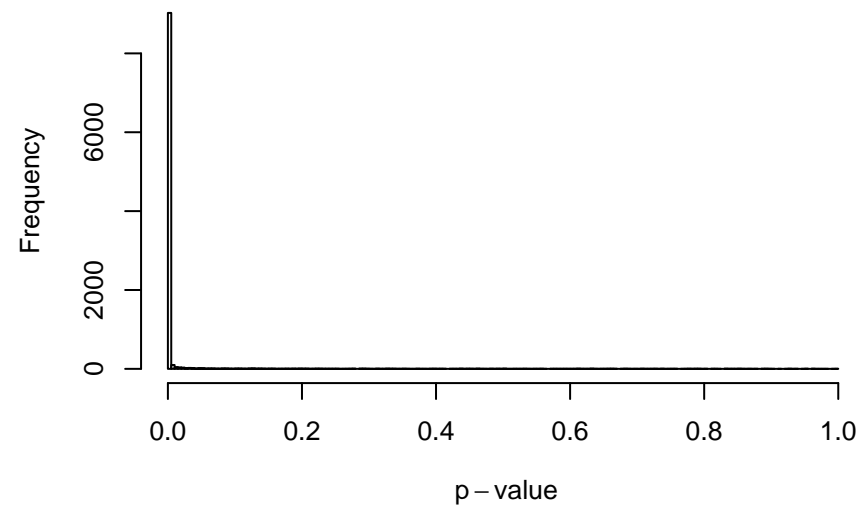

Distribution of  $R^2$  values

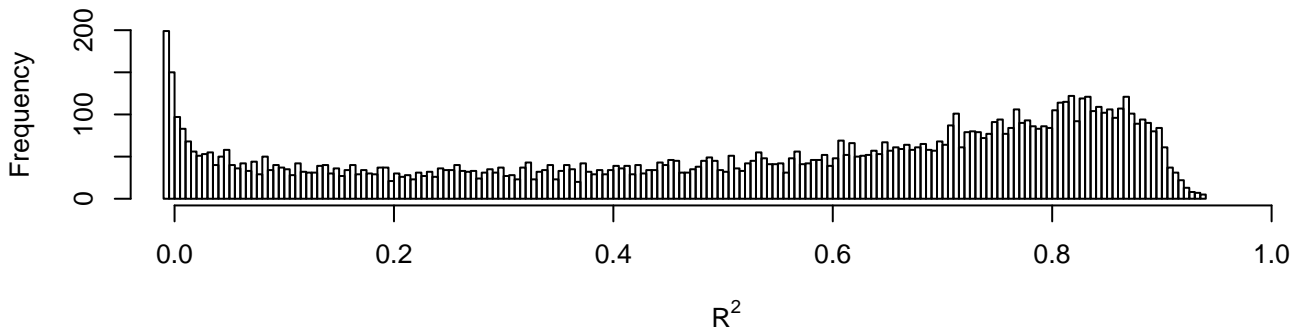

Distribution of mean residuals

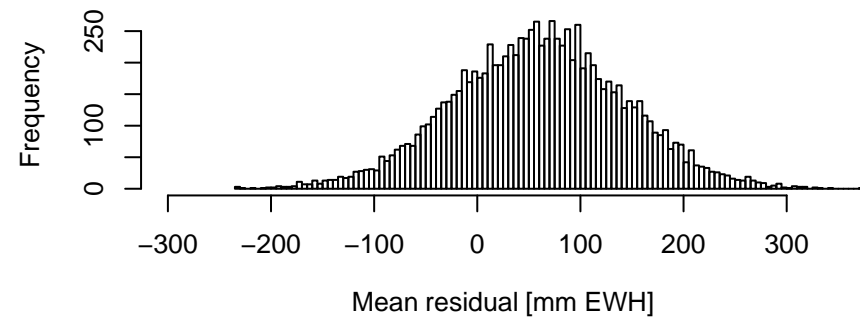

Correlation of GRACE GWS and adjusted GWL for YM3

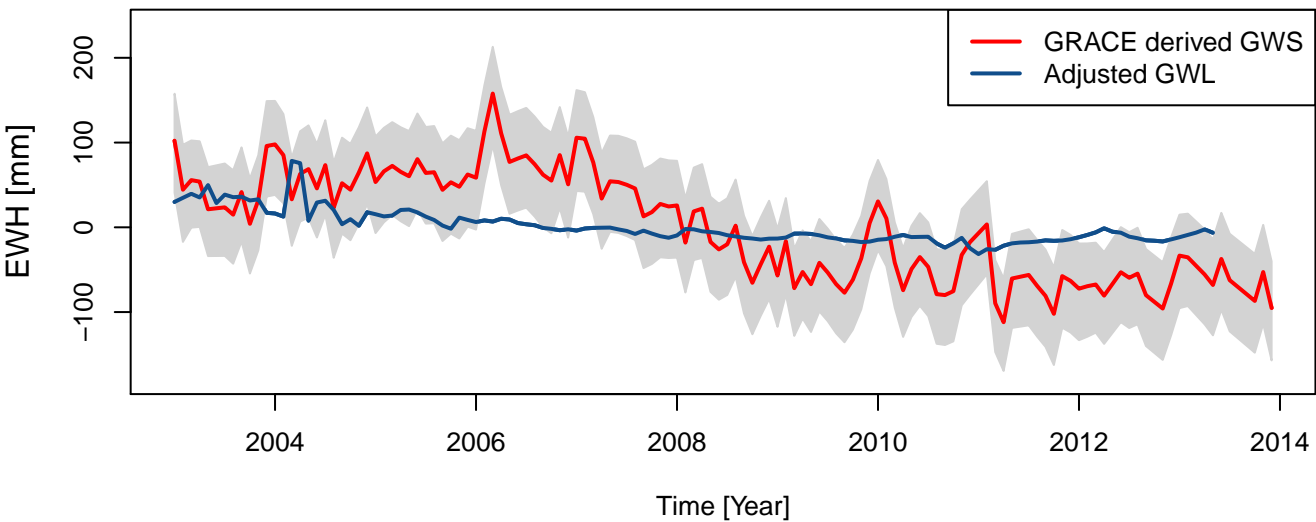

Distribution of p-values

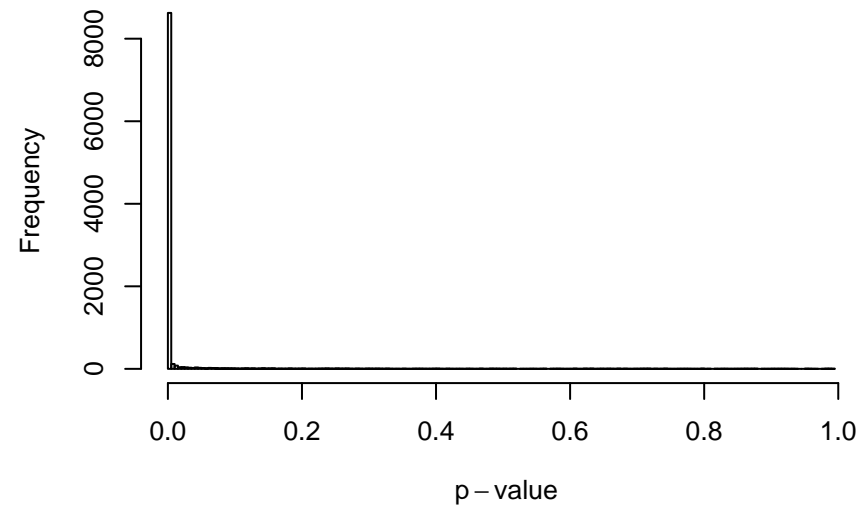

Distribution of  $R^2$  values

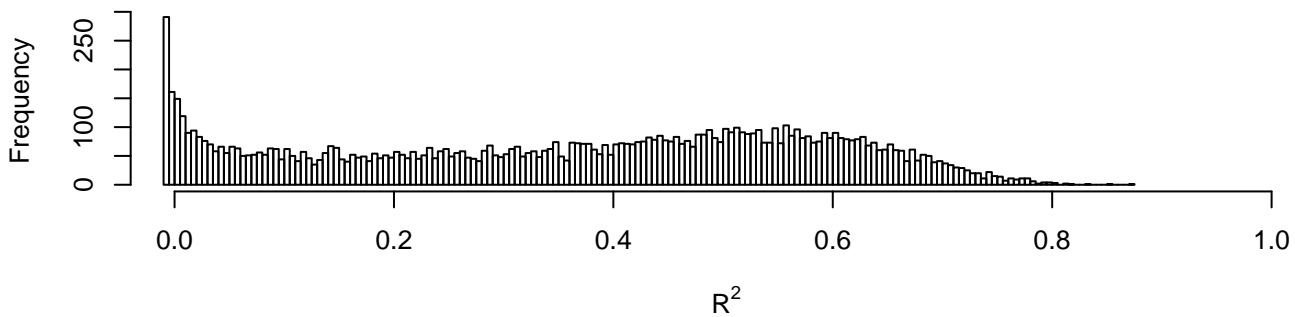

Distribution of mean residuals

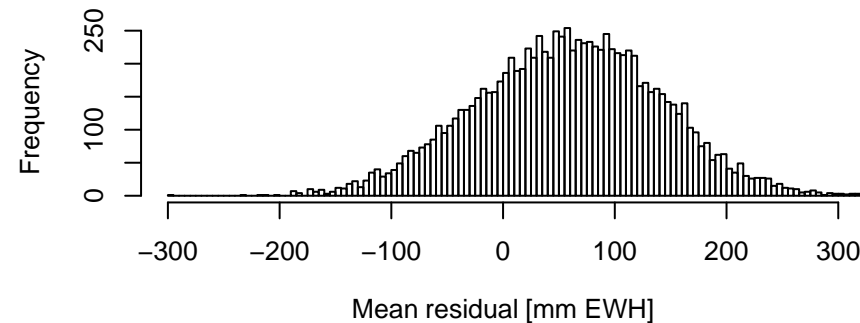

Decomposed GRACE derived GWS, Azraq Basin

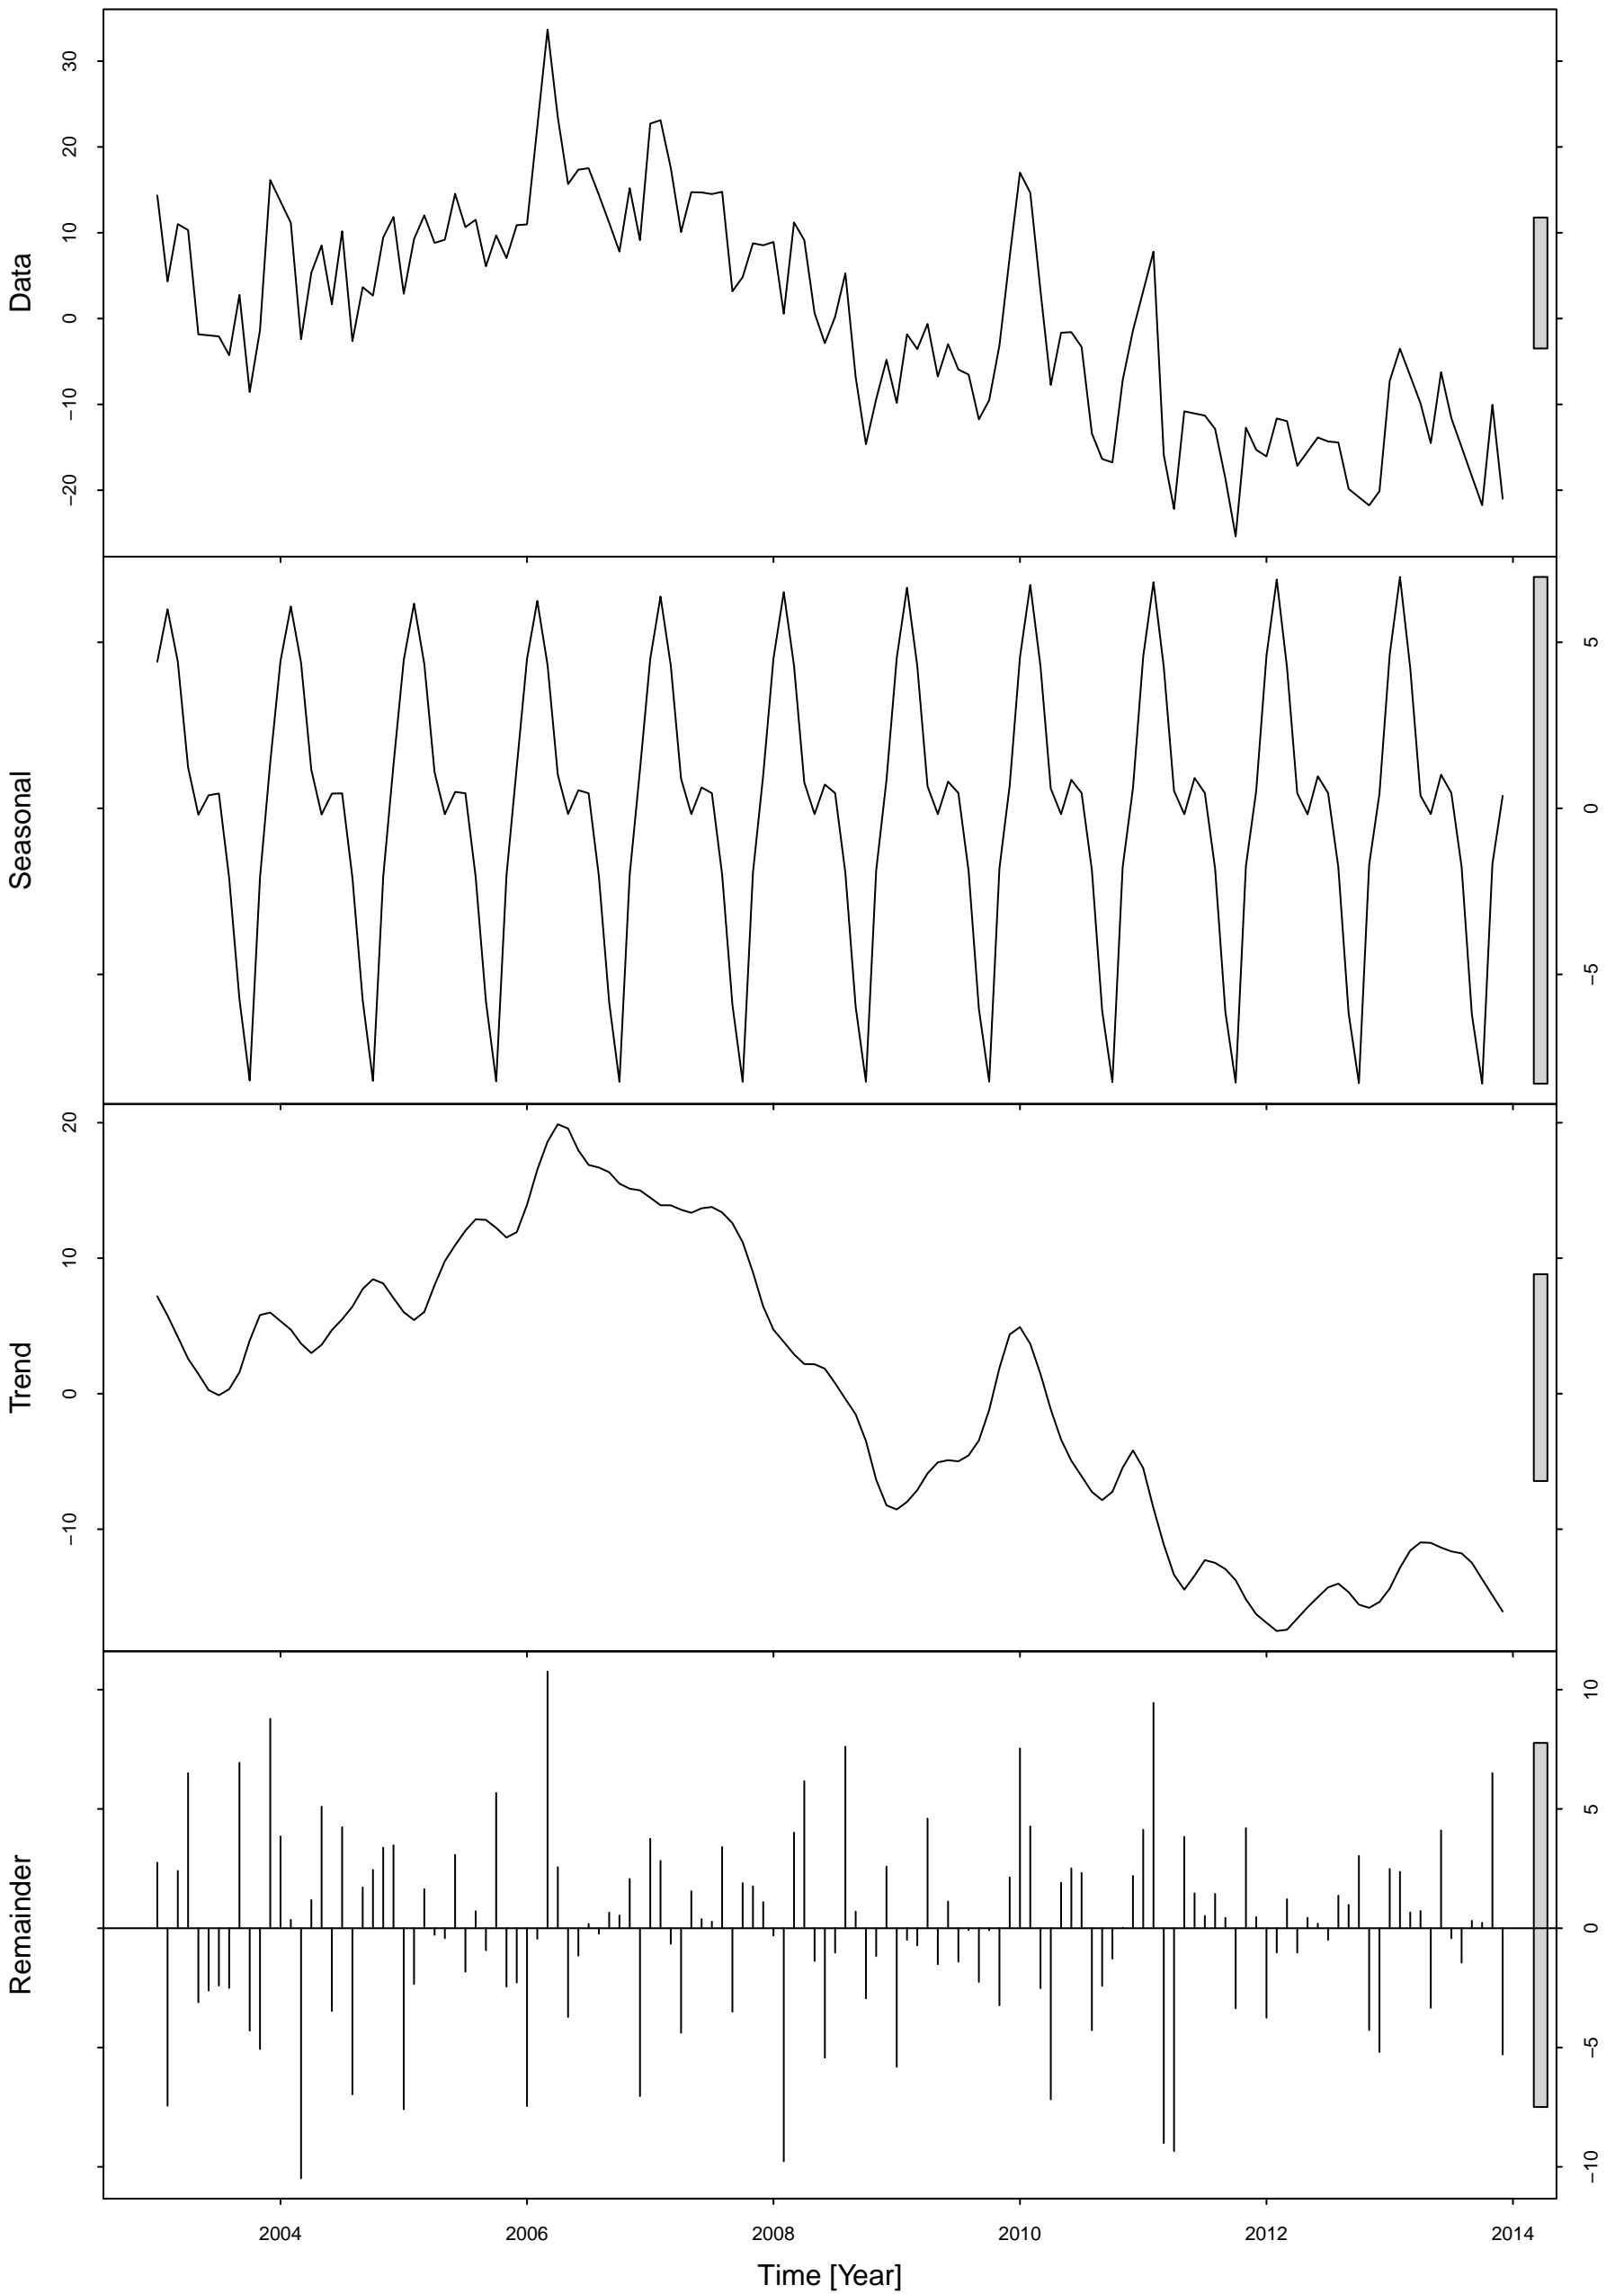

Decomposed GRACE derived GWS, Amman-Zarqa Basin

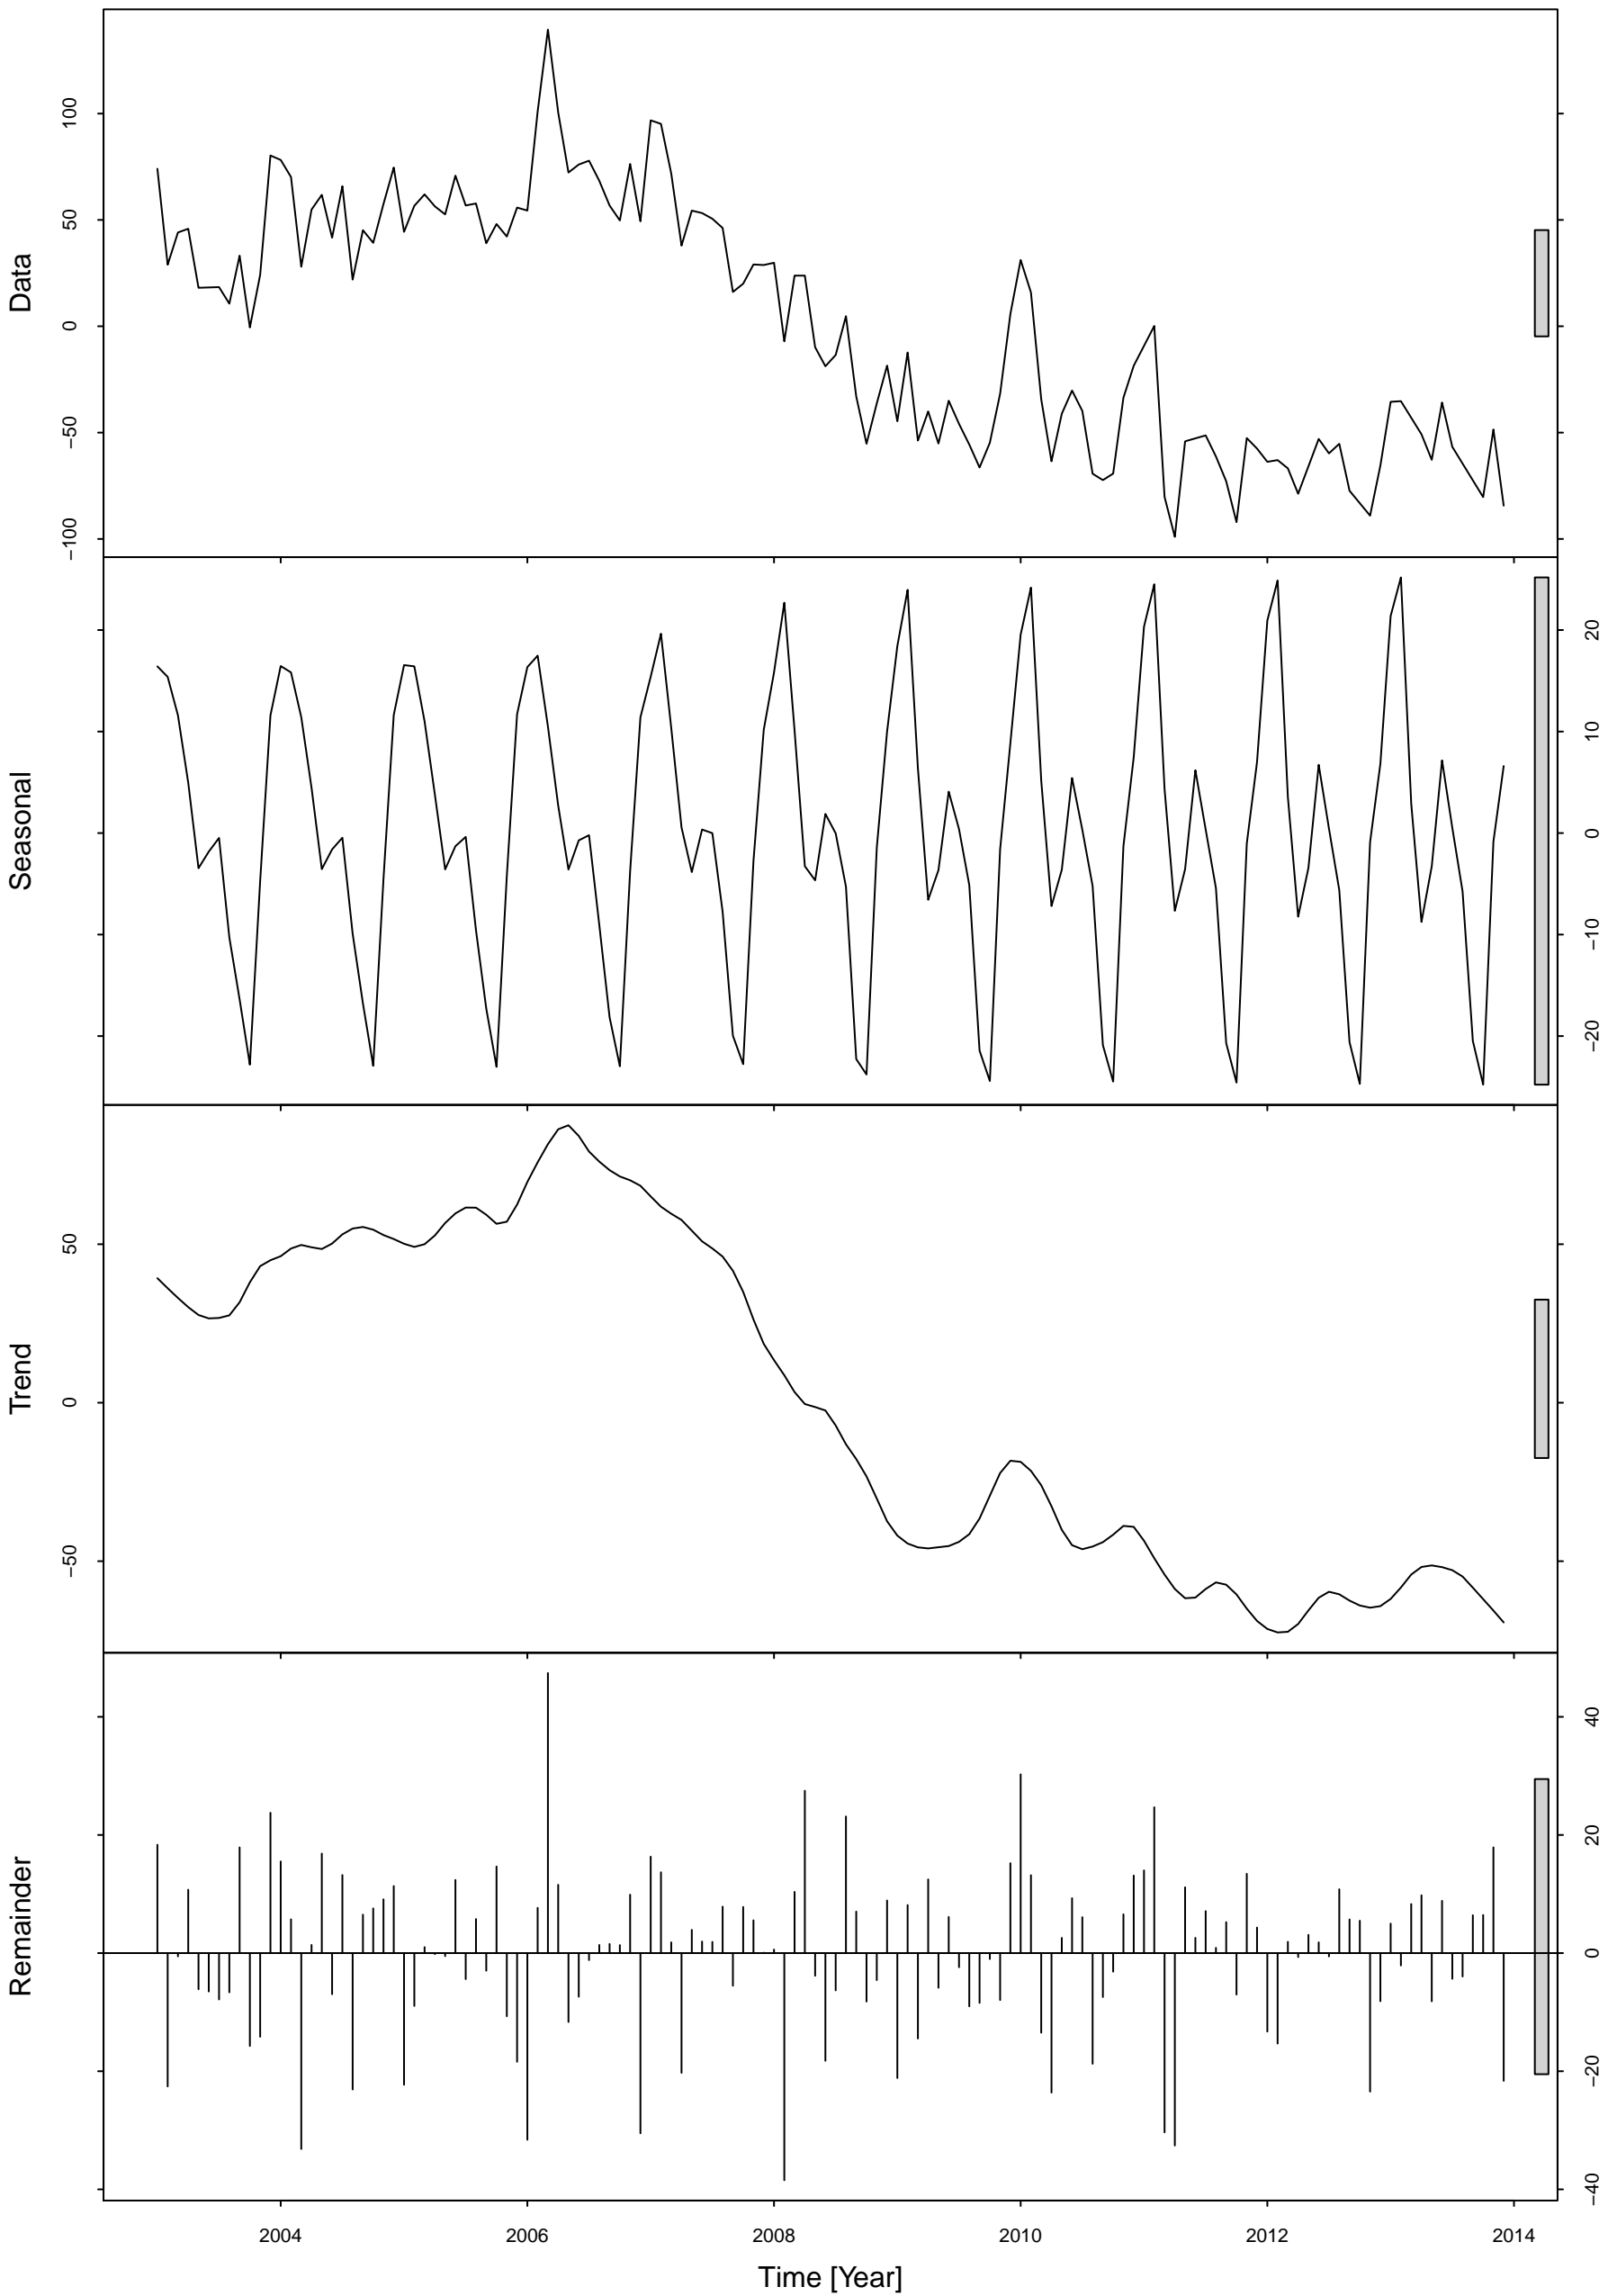

Decomposed GRACE derived GWS, Dead Sea Basin

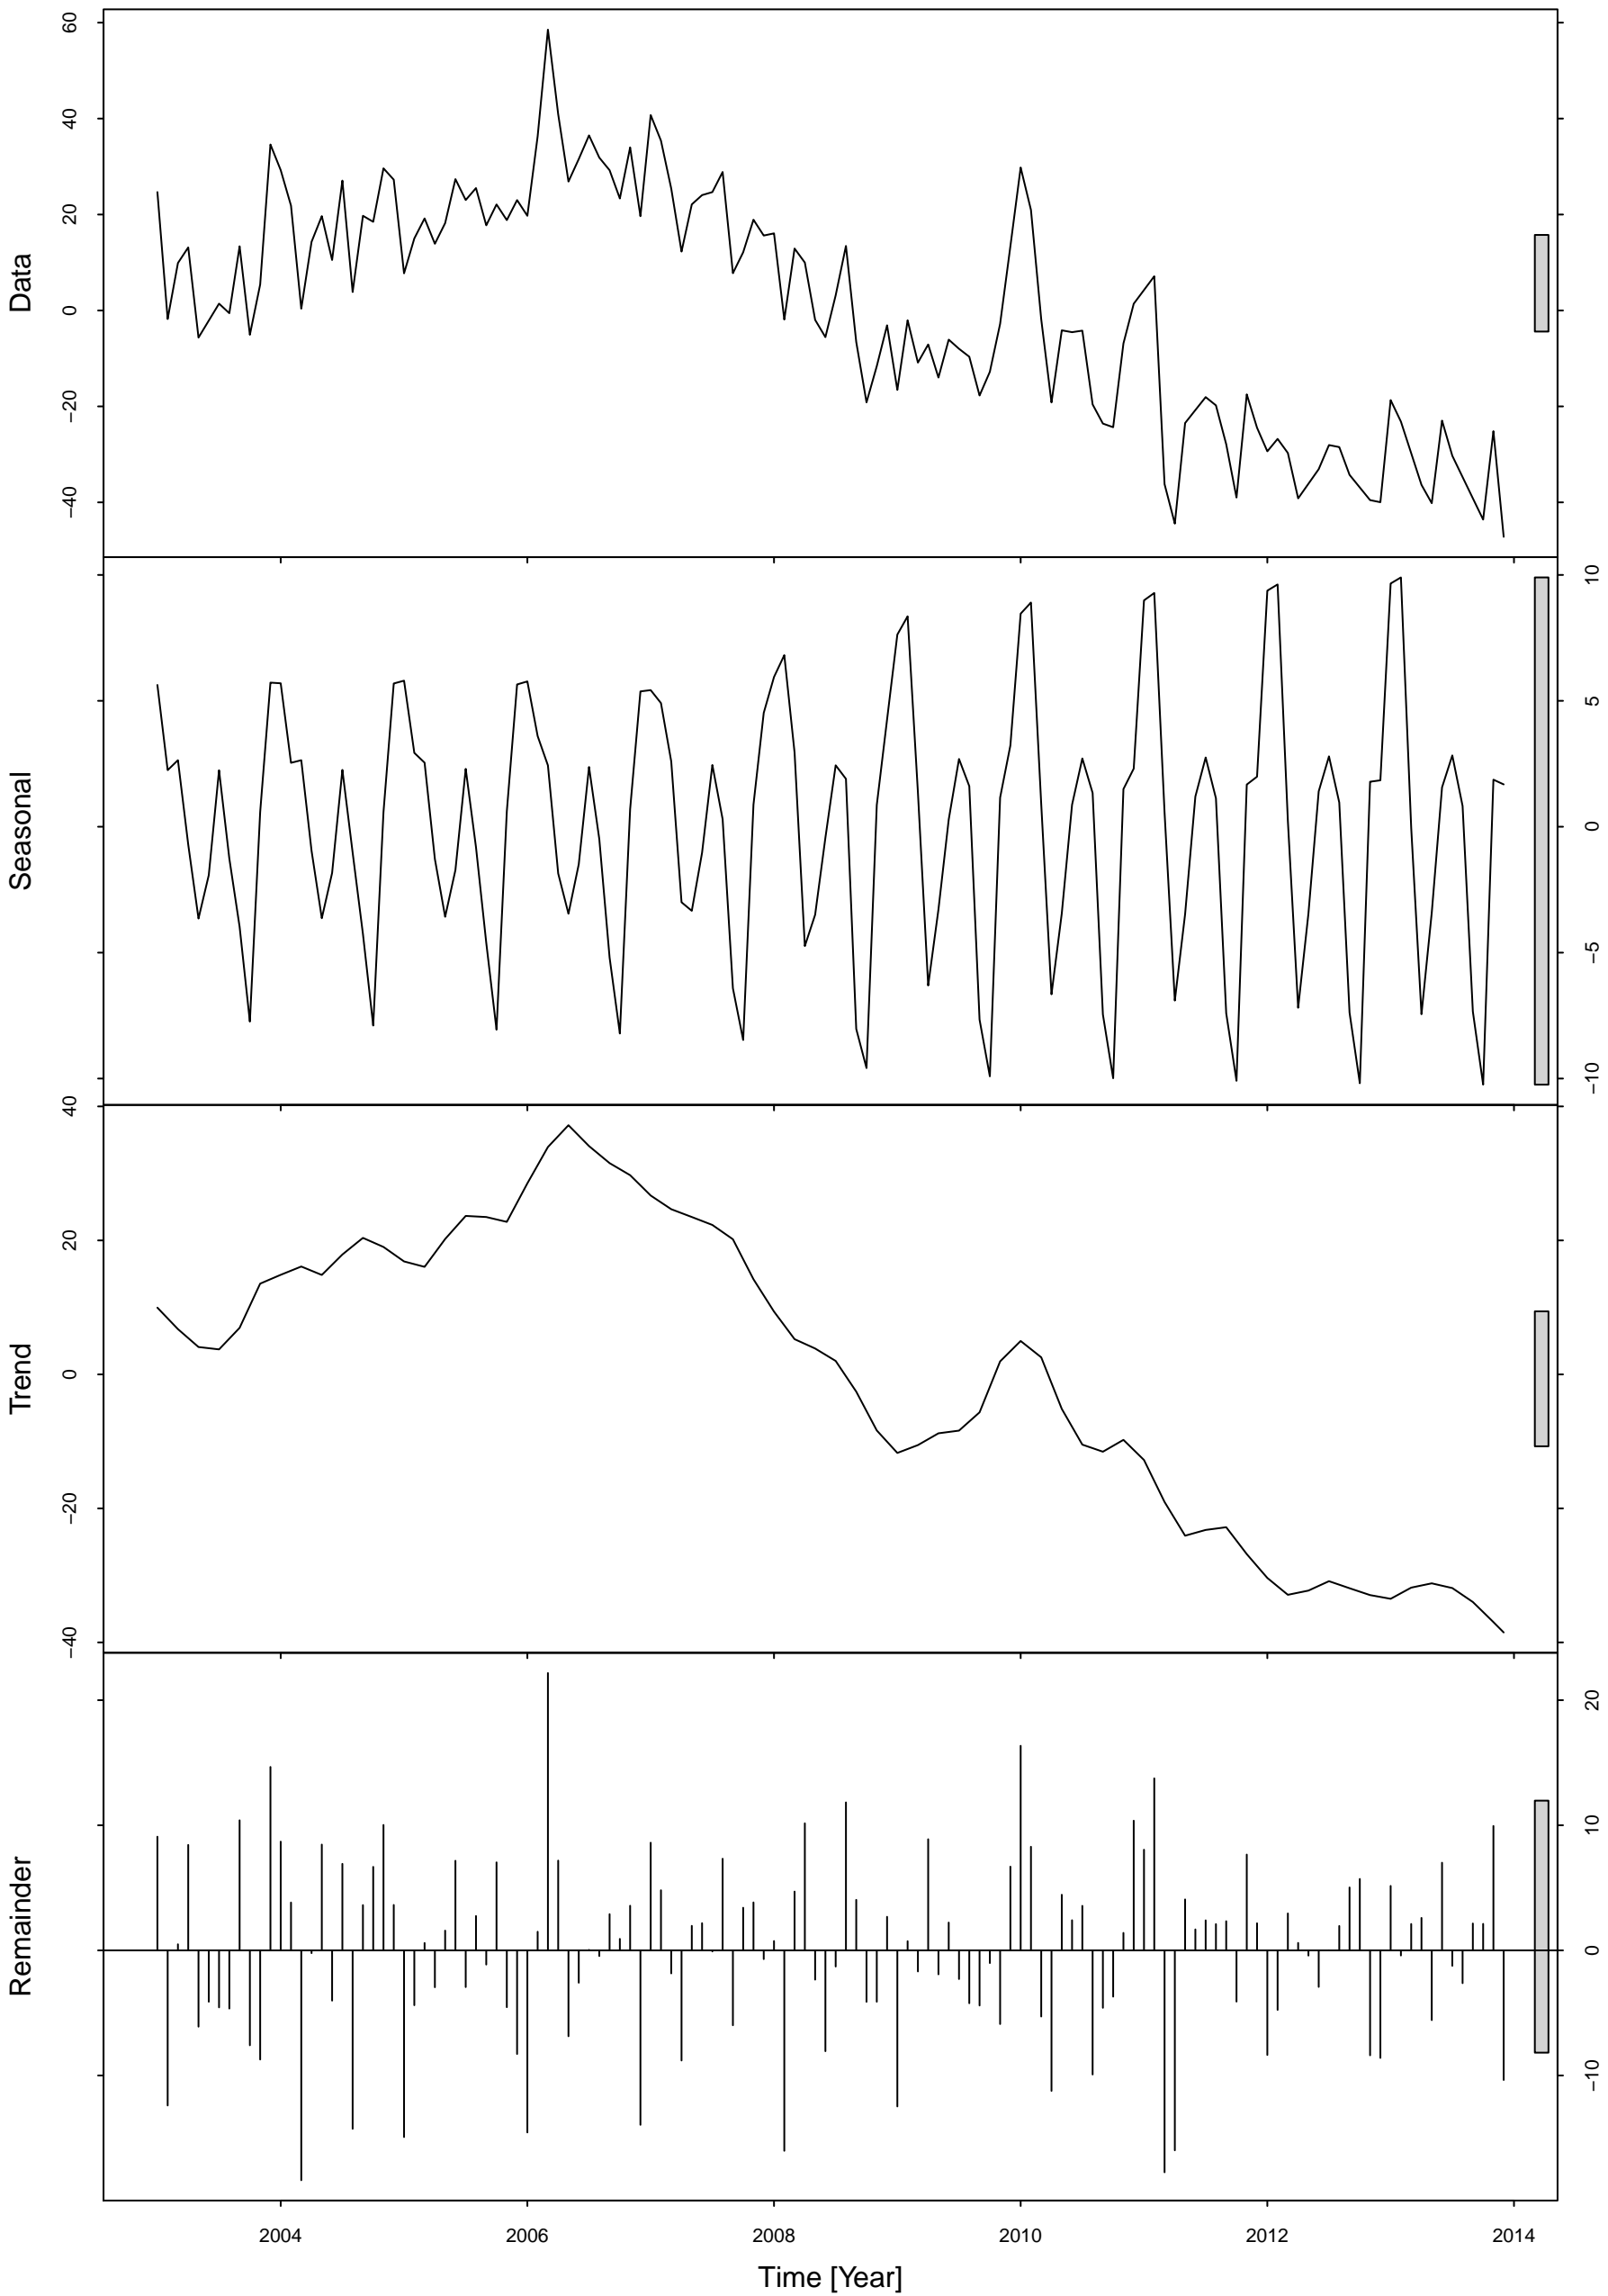



Decomposed GRACE derived GWS, Side Wadis Basin

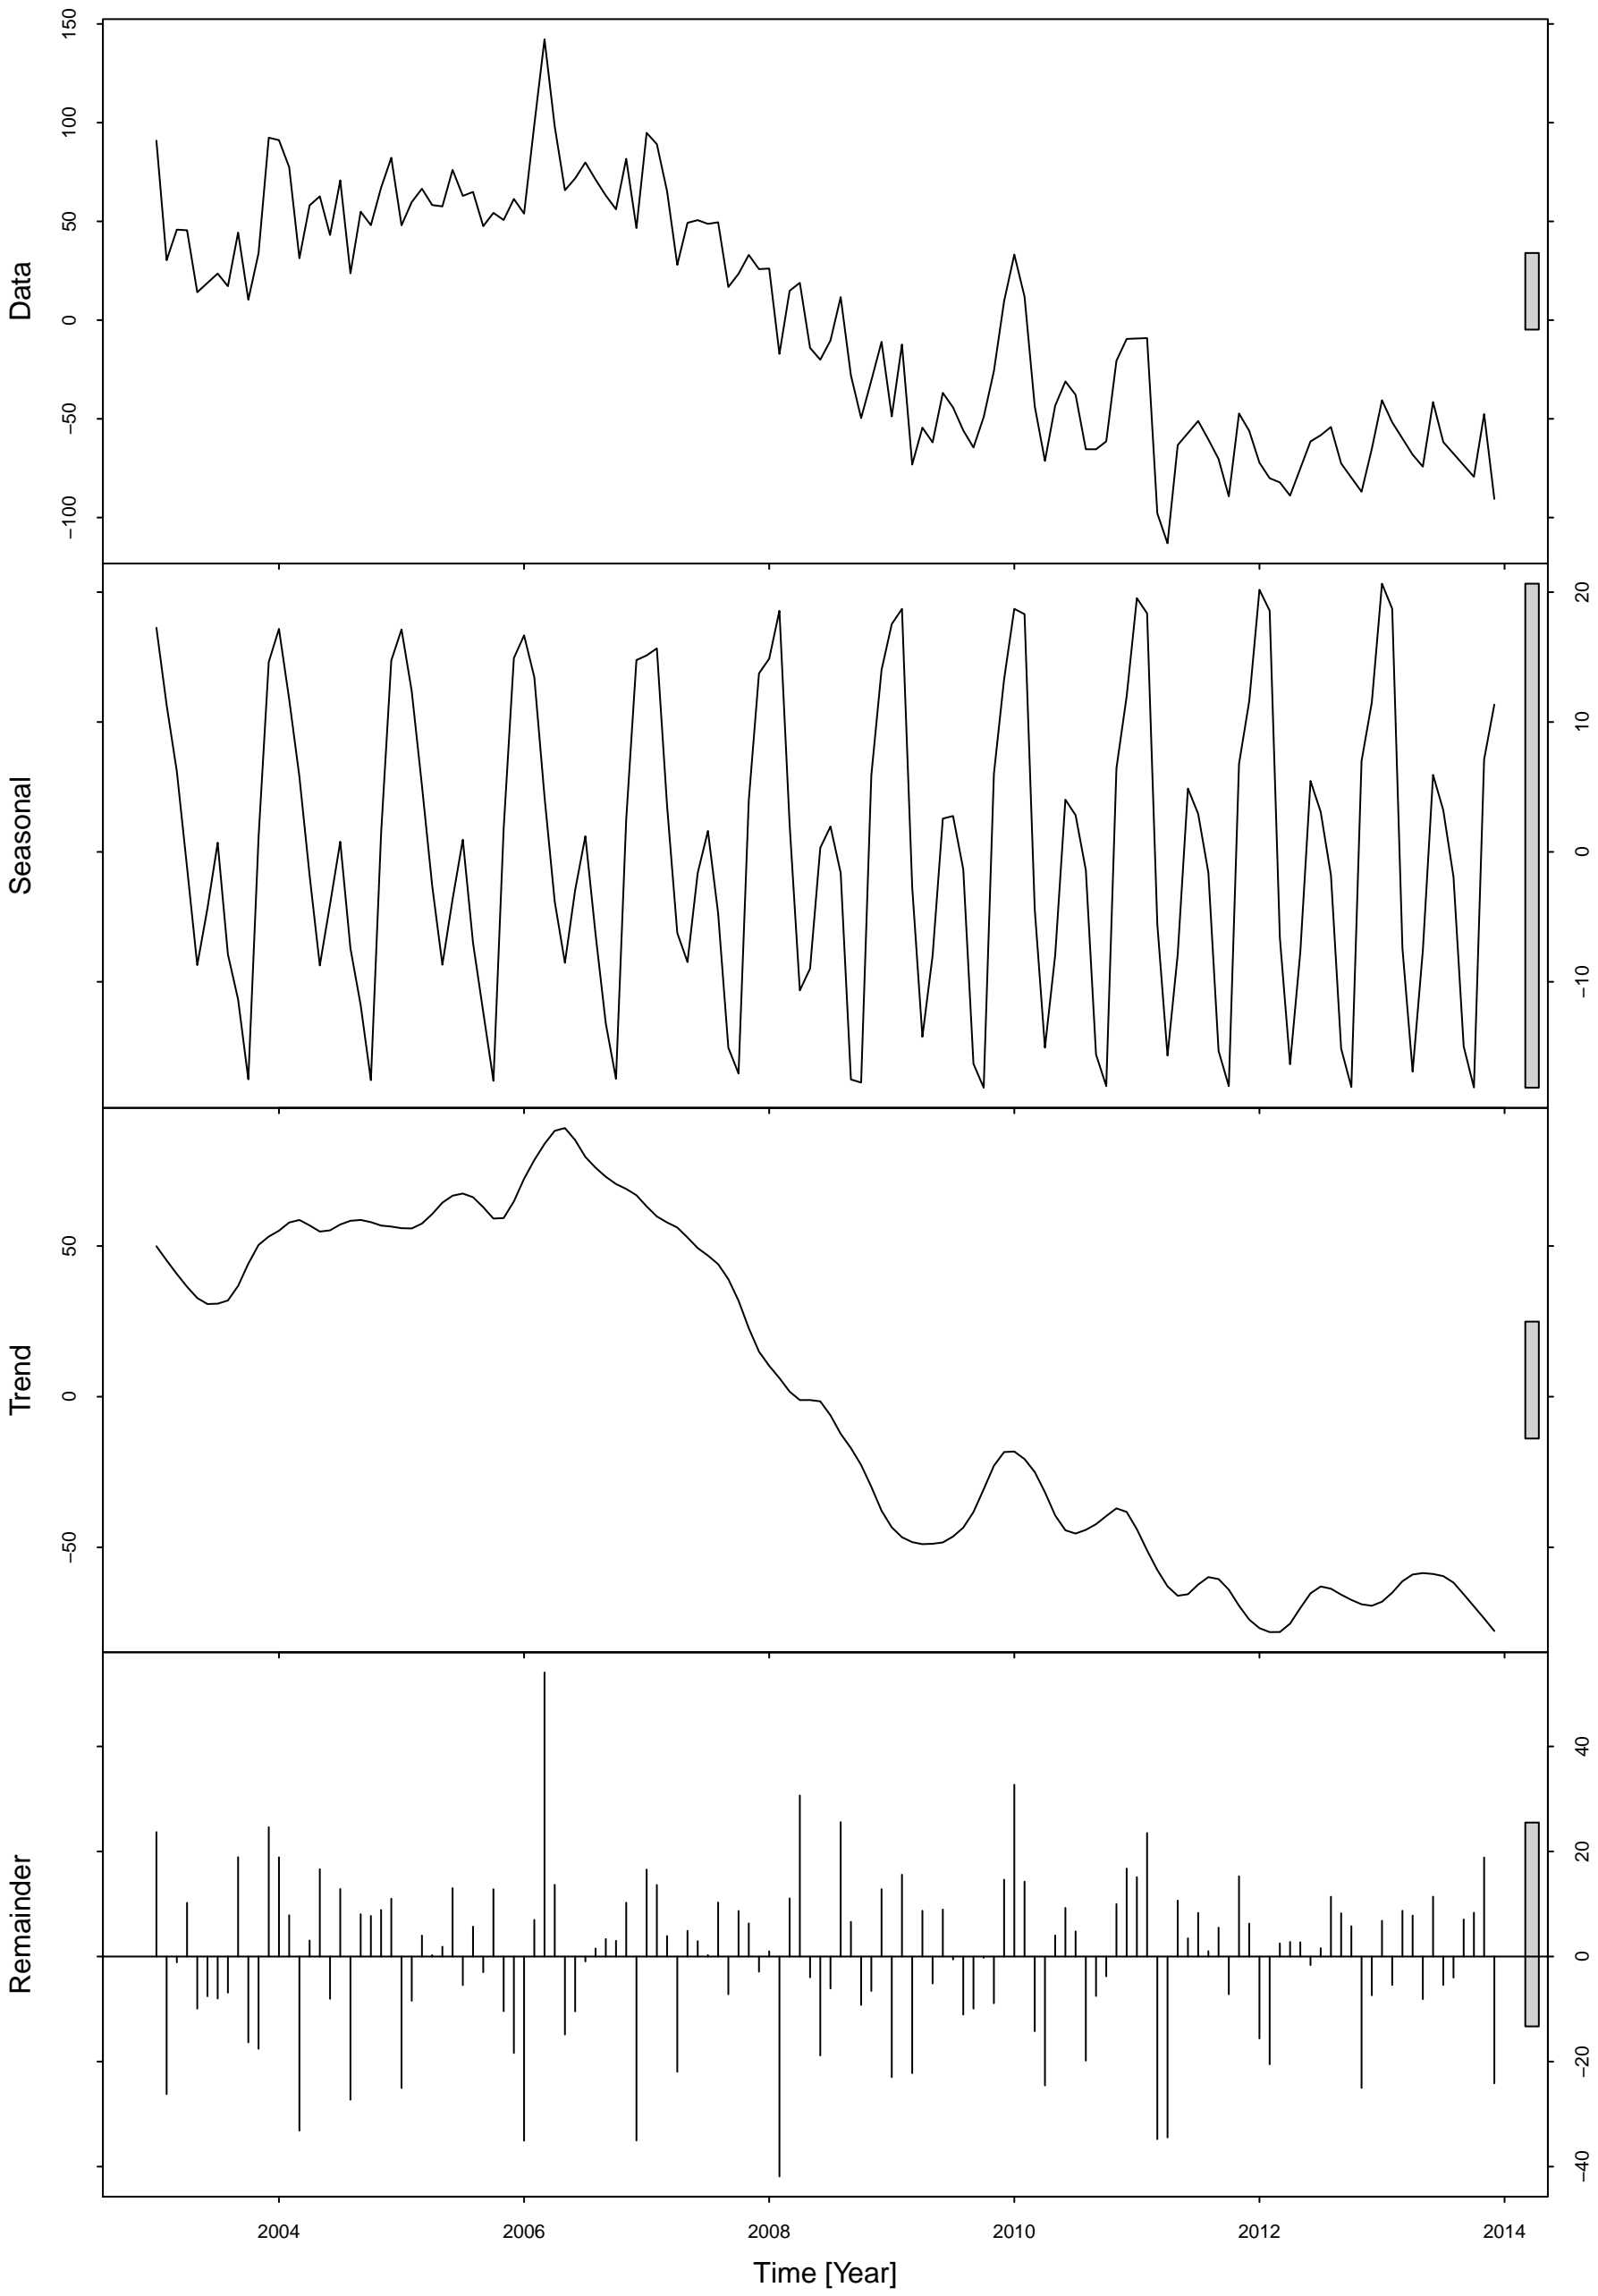

Decomposed GRACE derived GWS, Yarmouk Basin

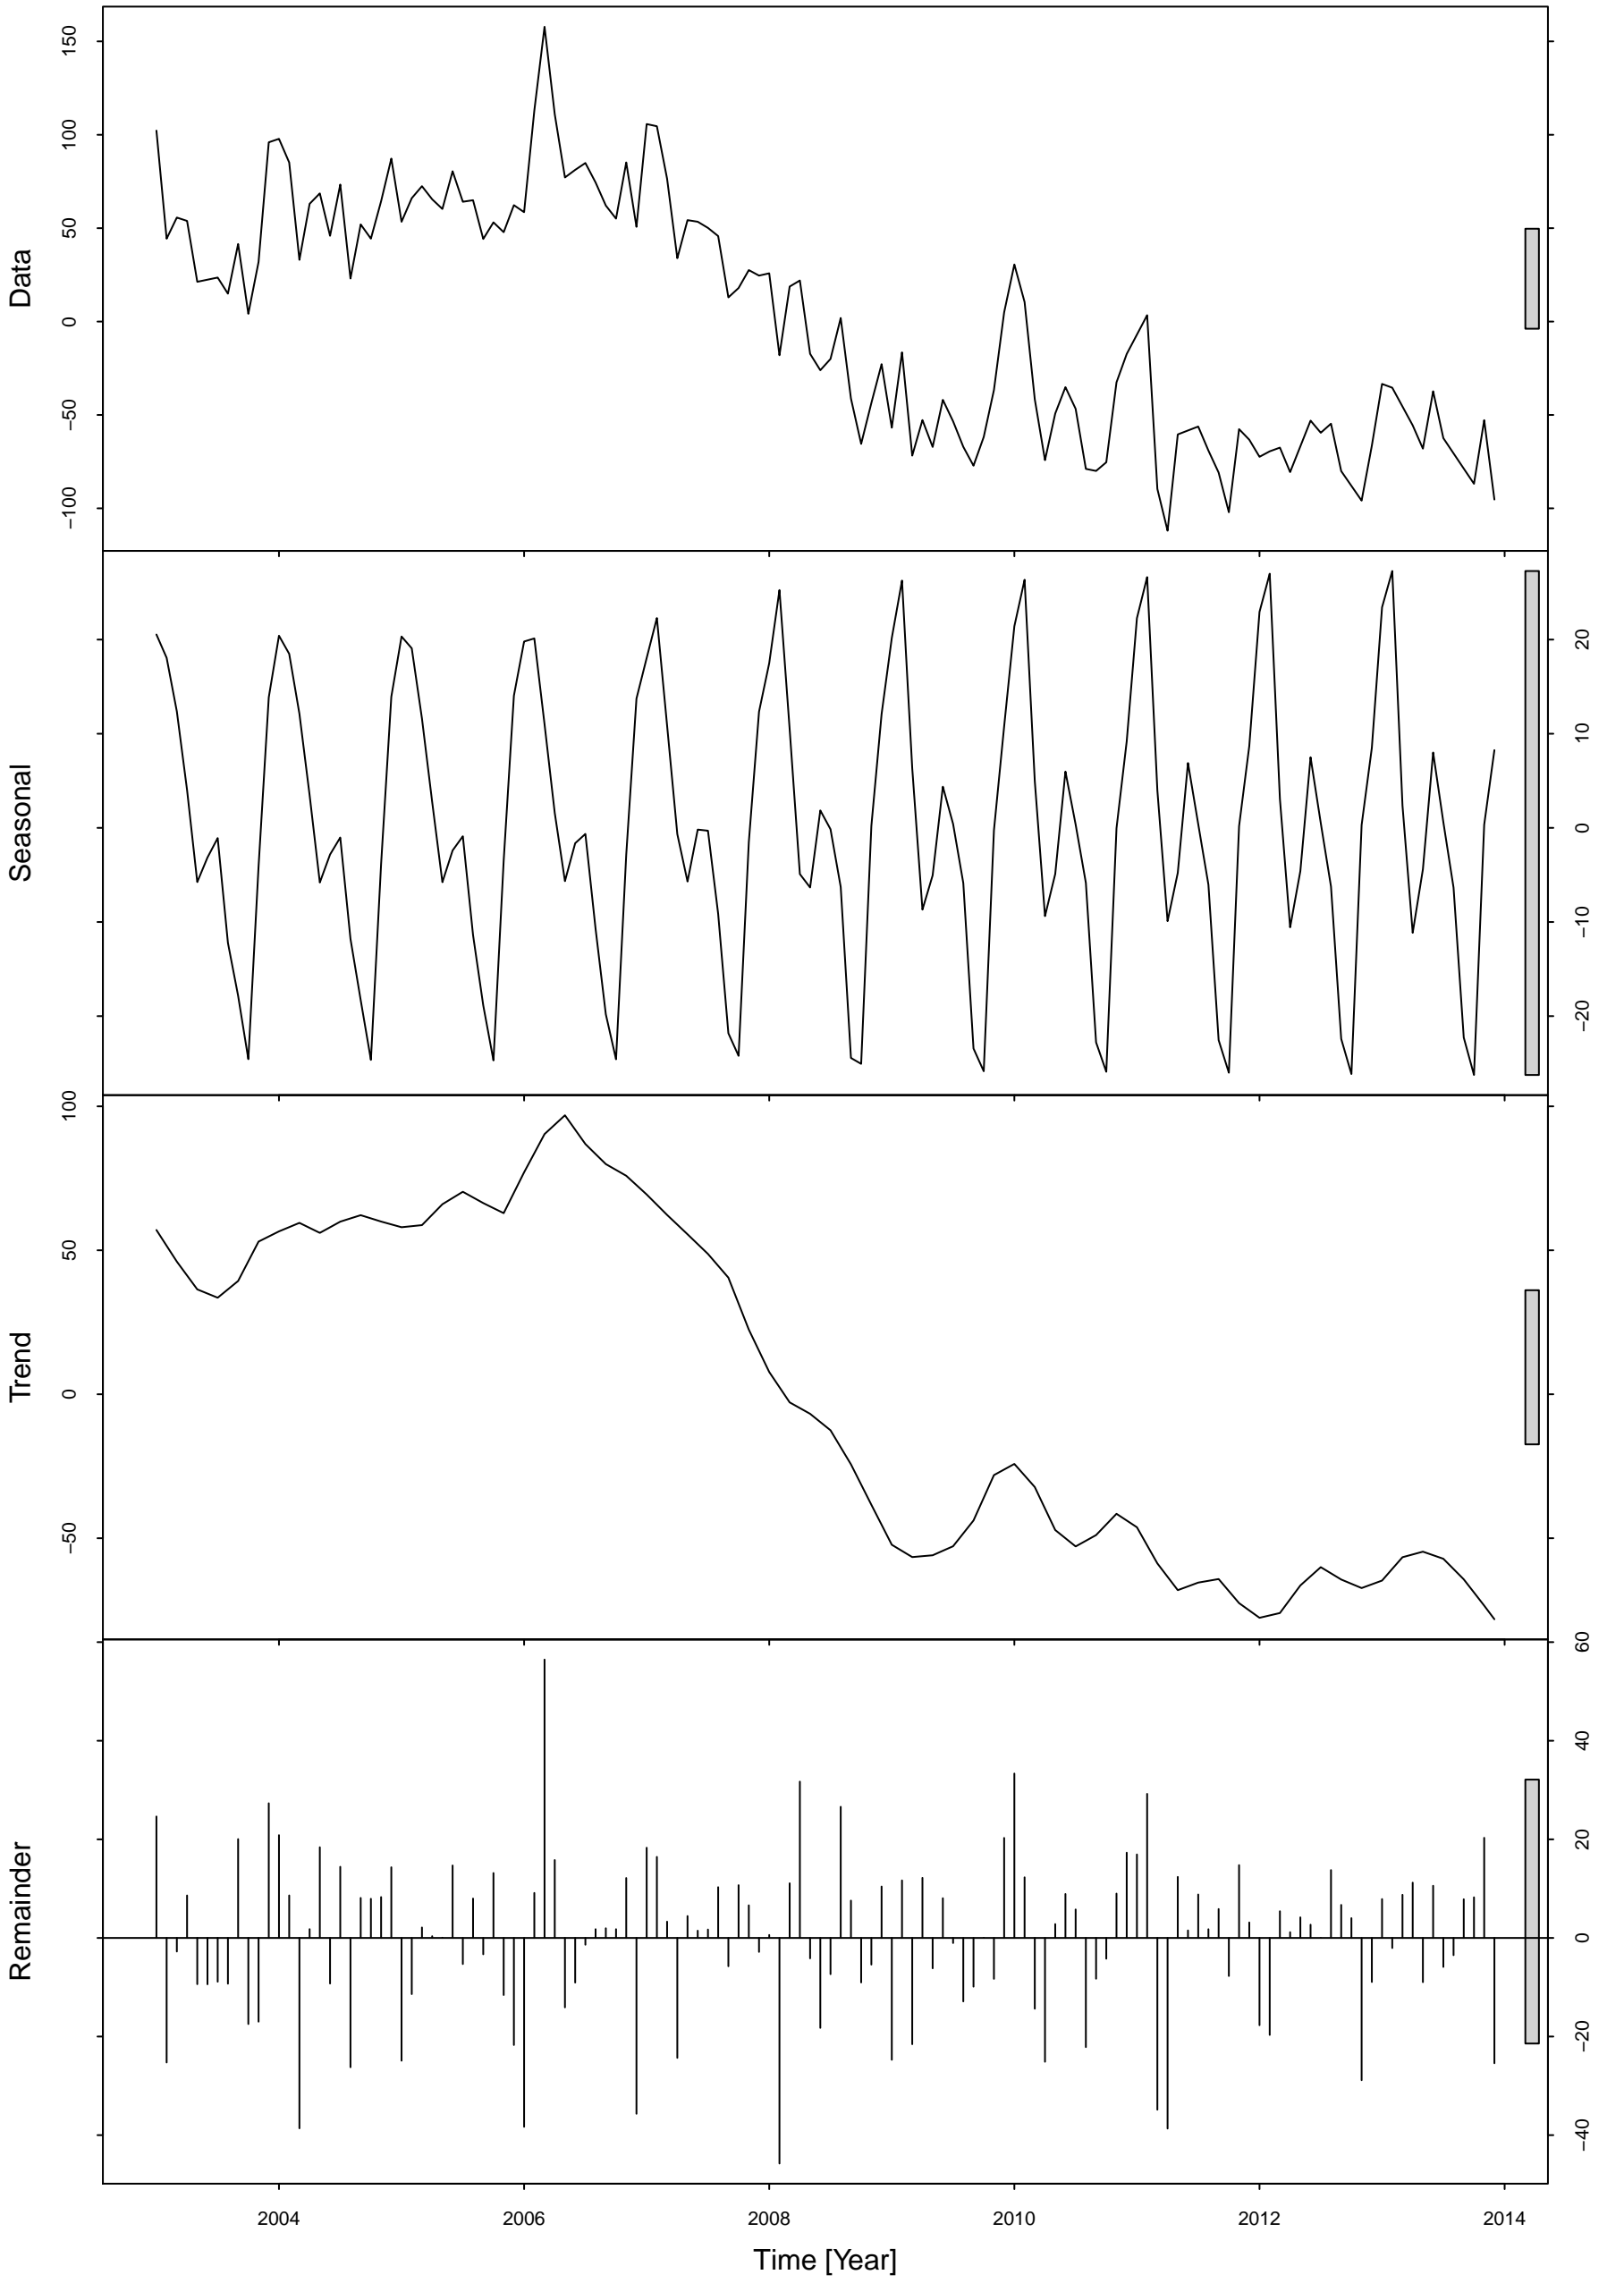

Decomposed averaged groundwater level of AR1-AR4

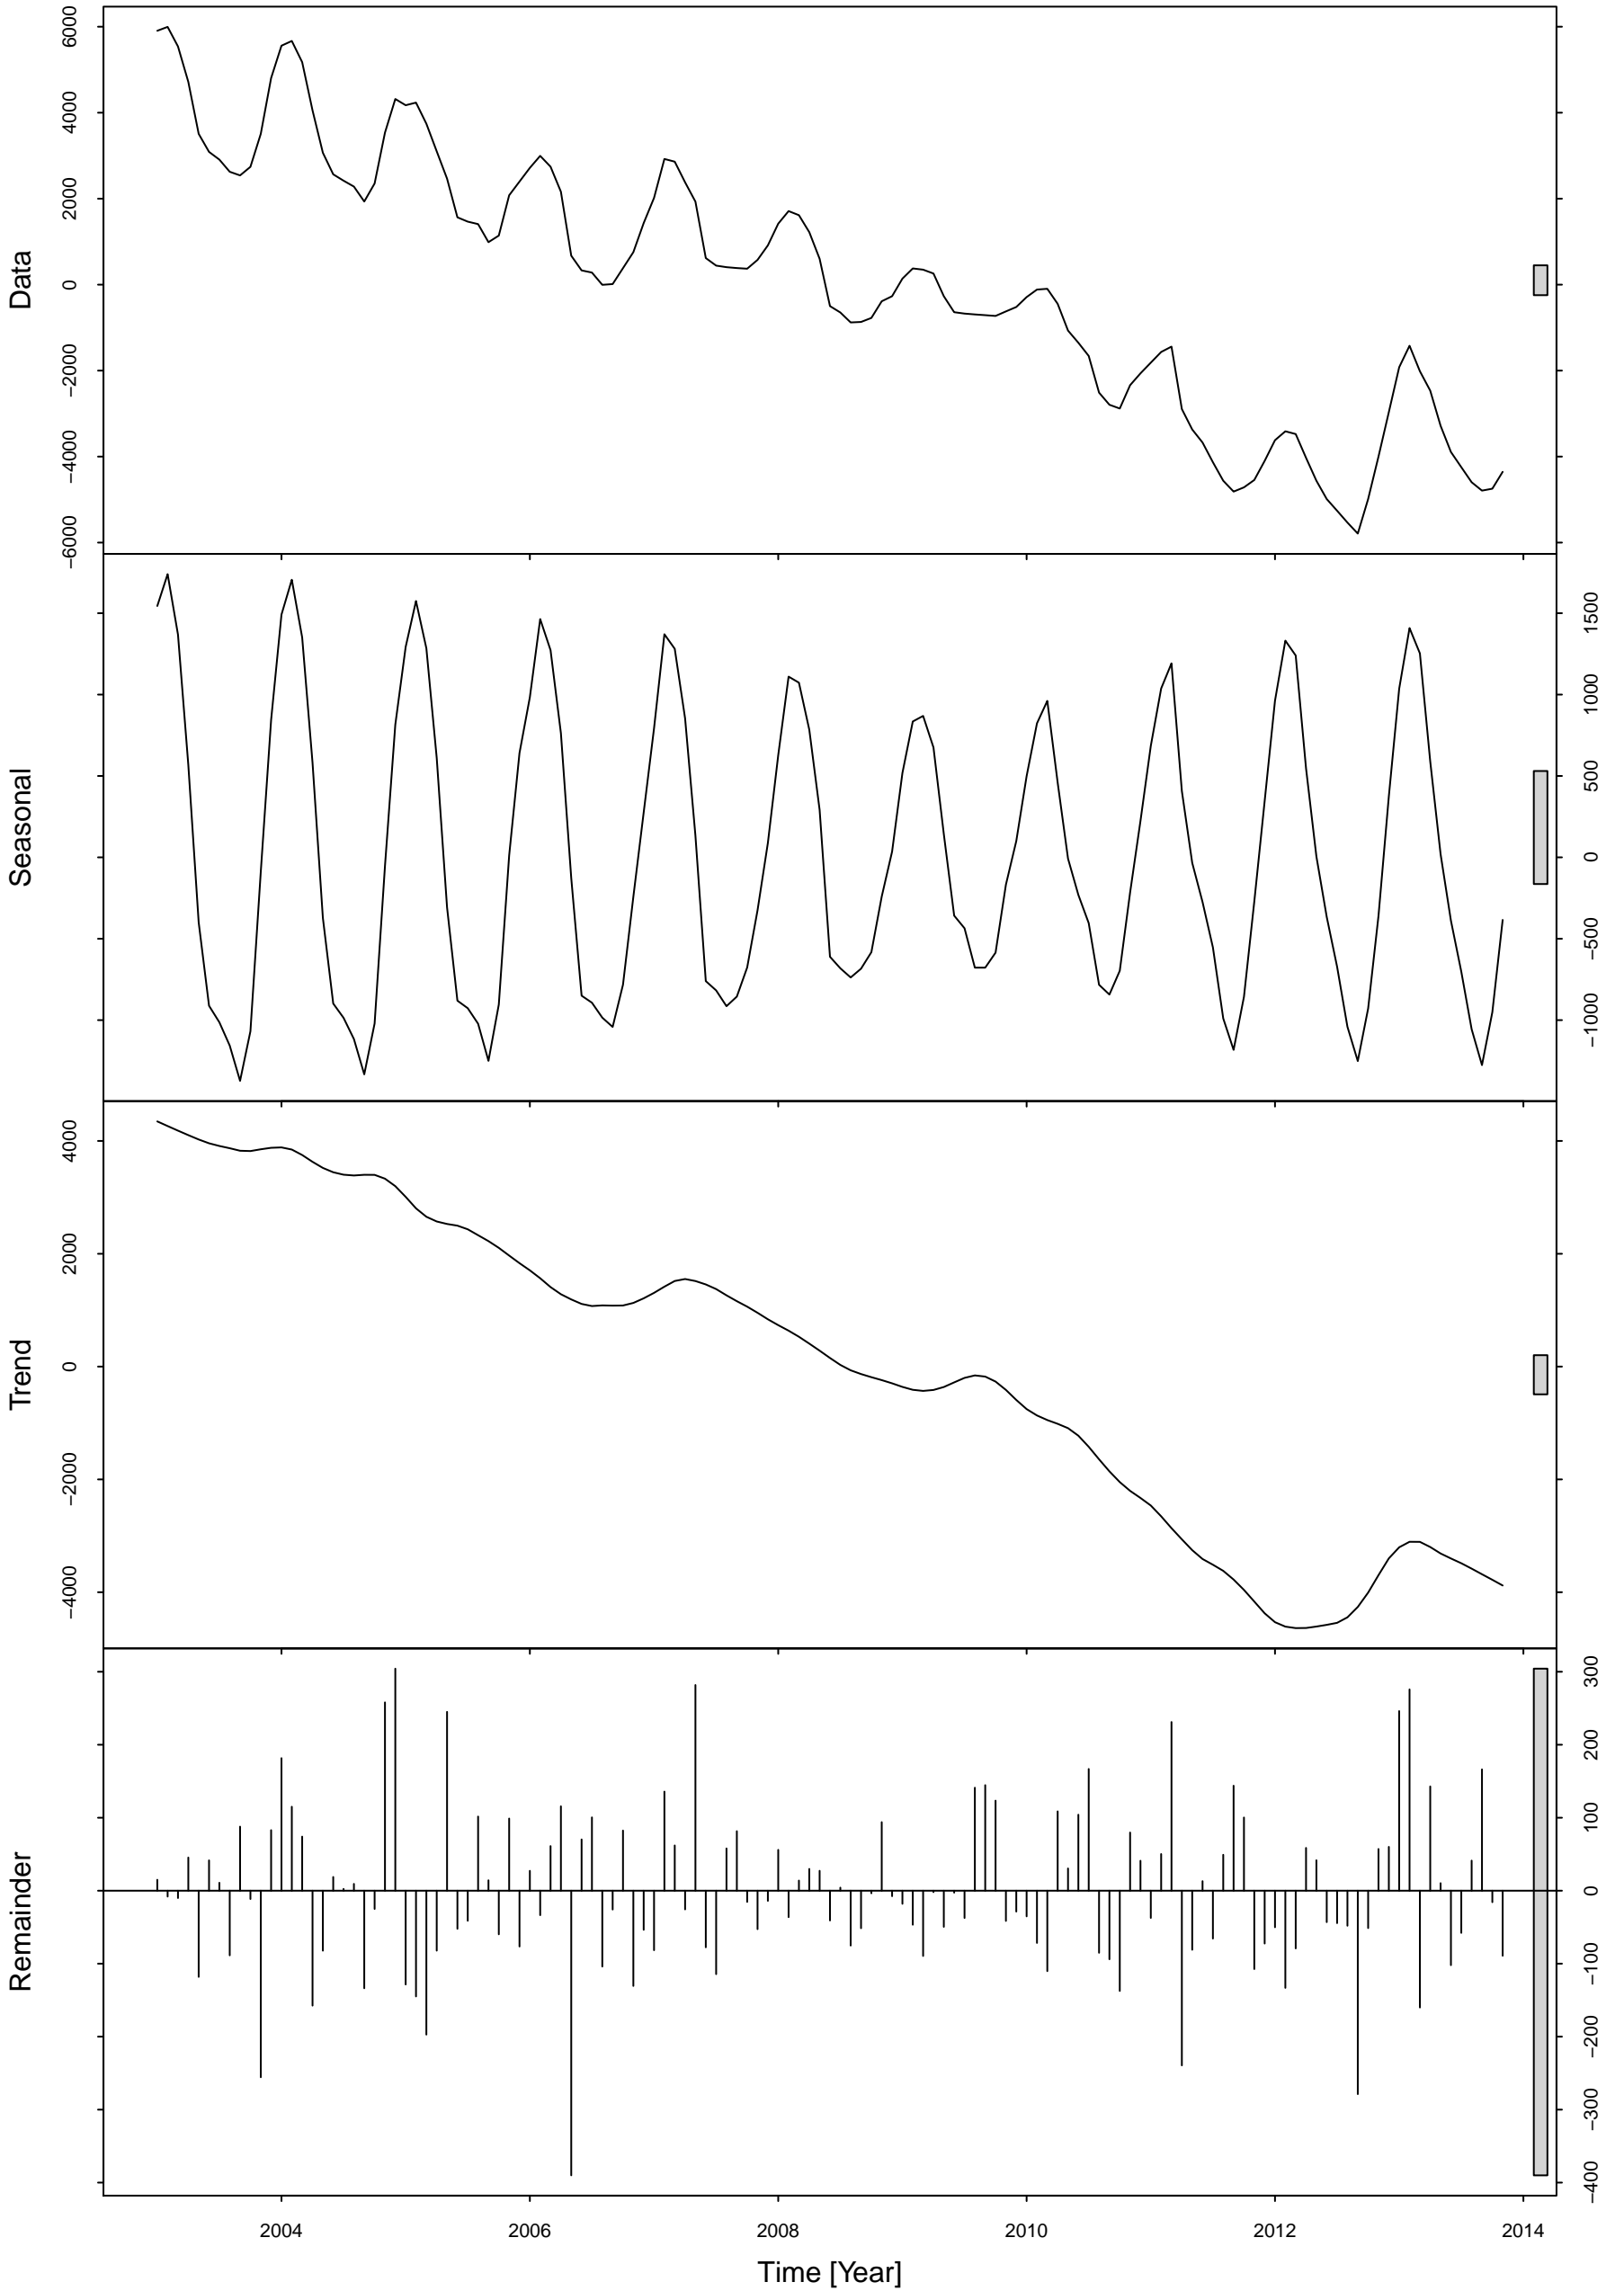

Decomposed groundwater level of AR5

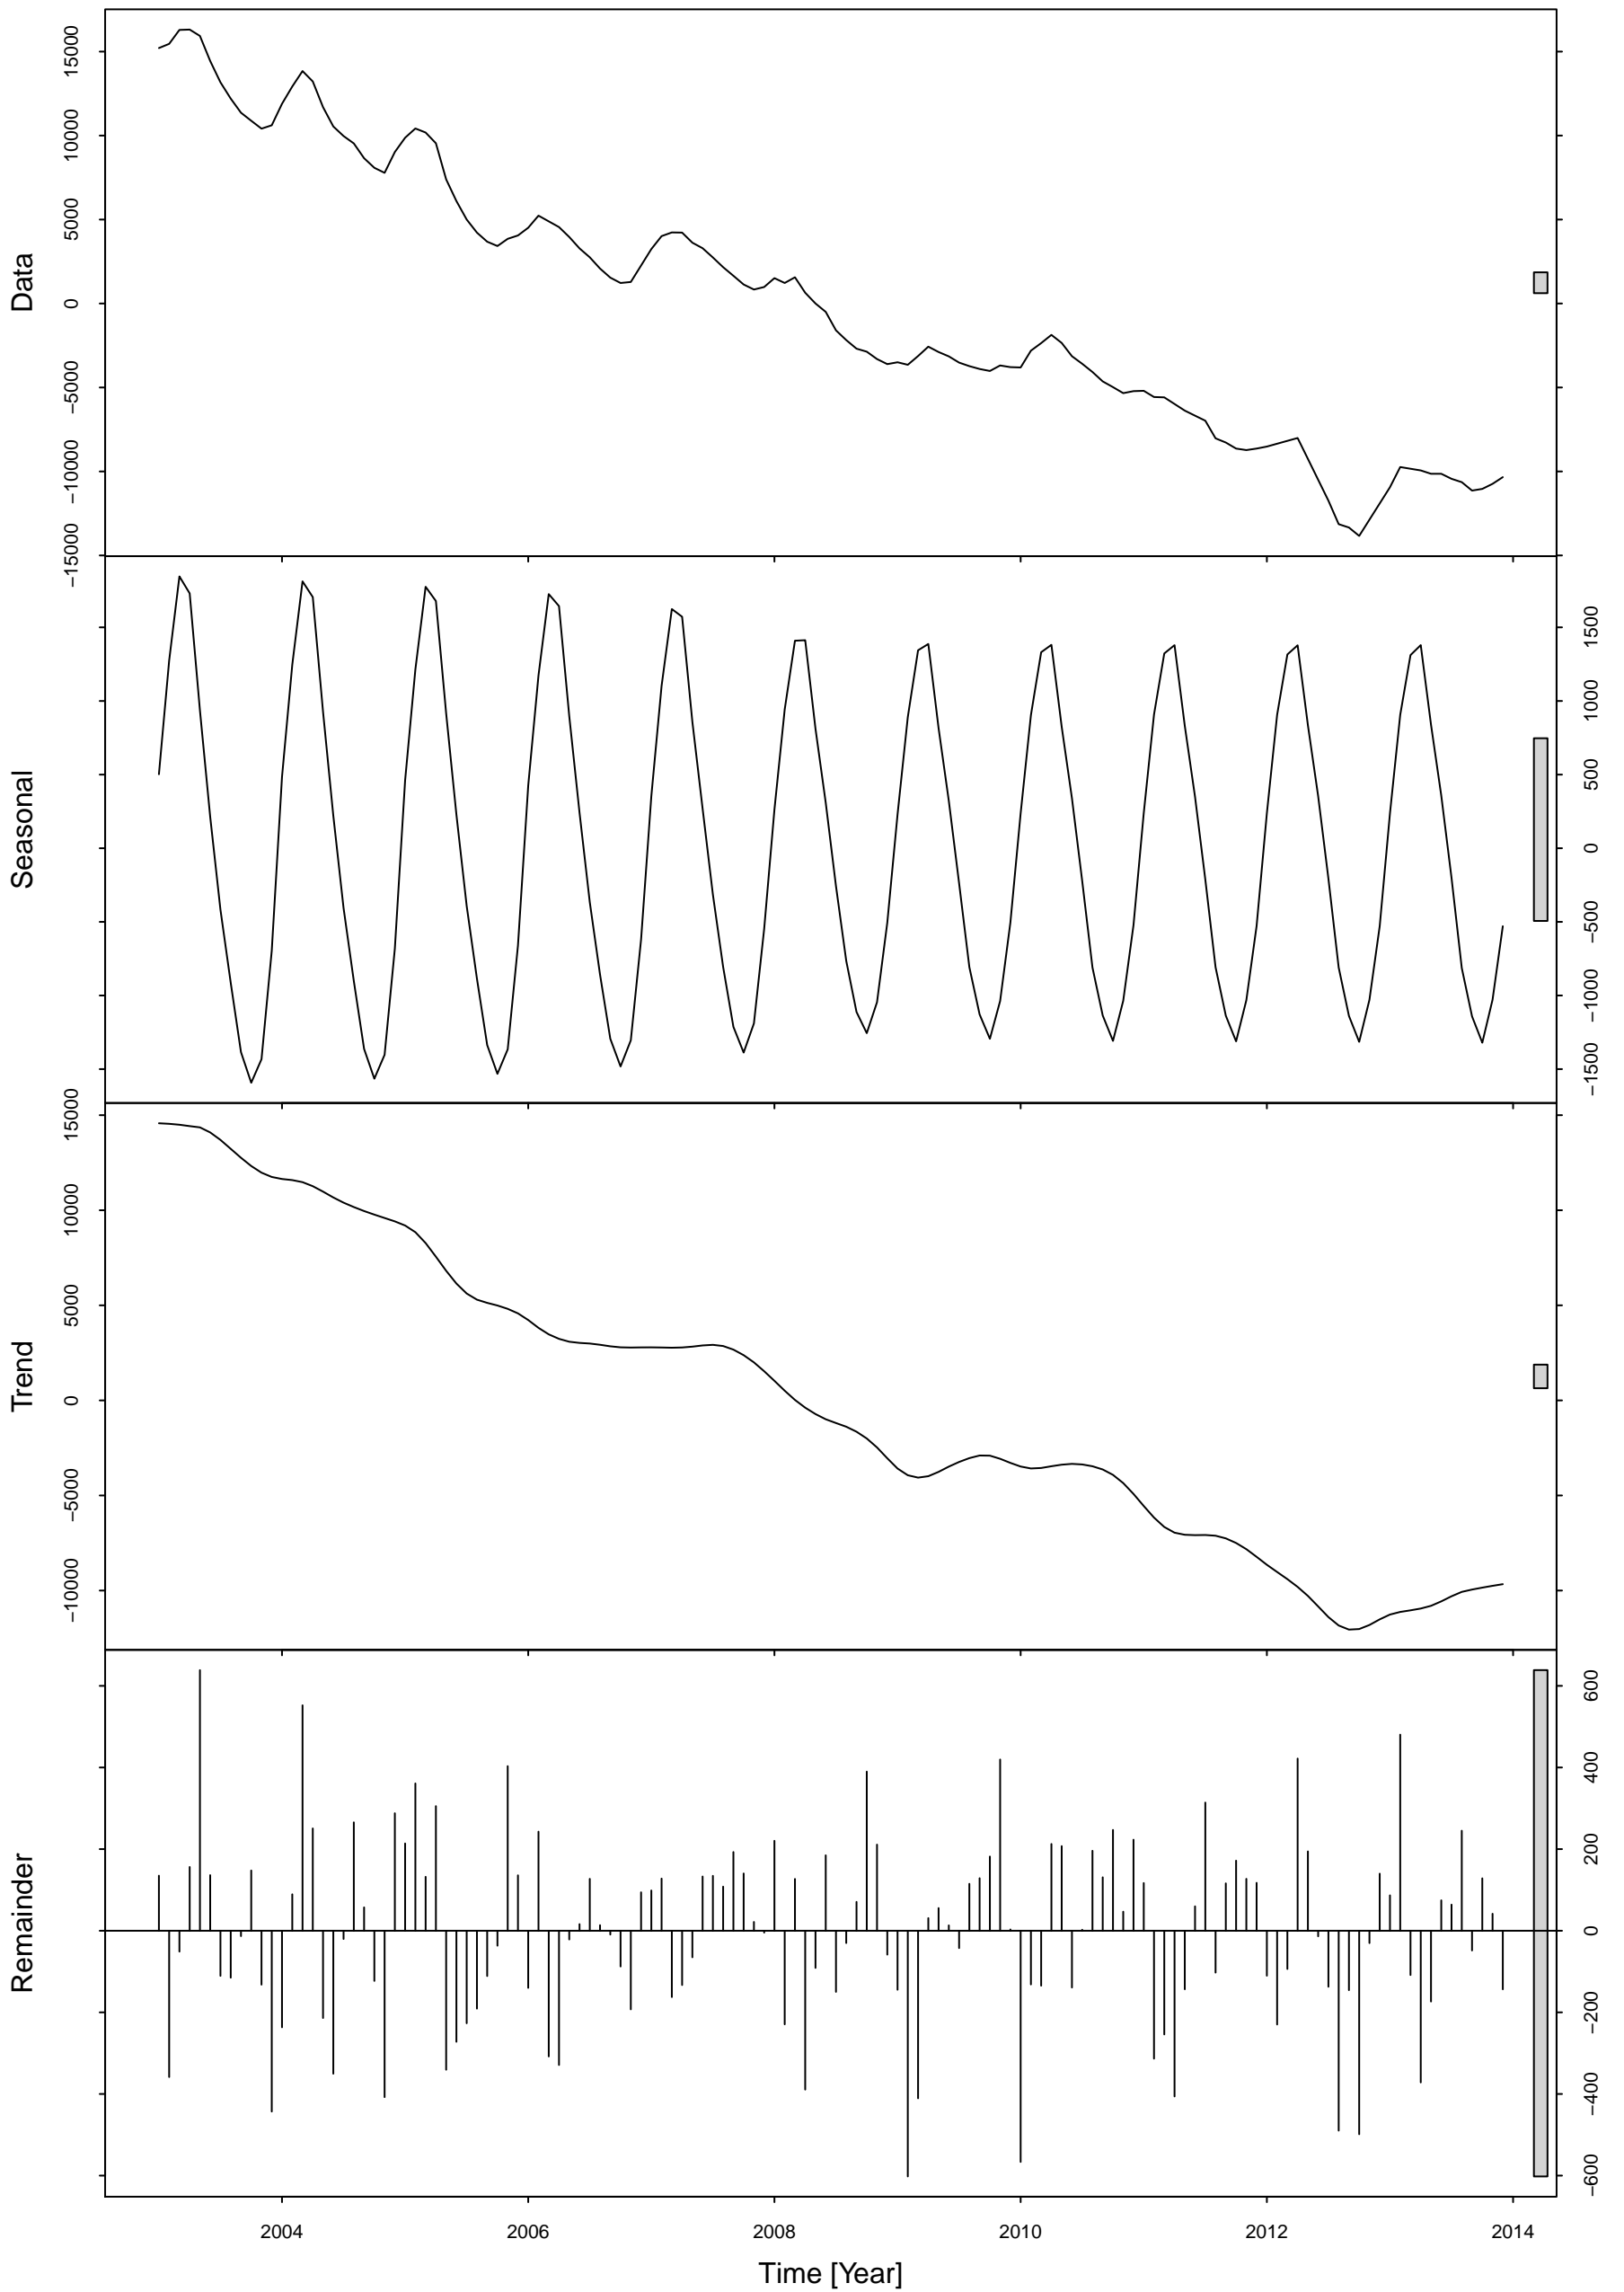

Decomposed averaged groundwater level of AZ1-AZ7

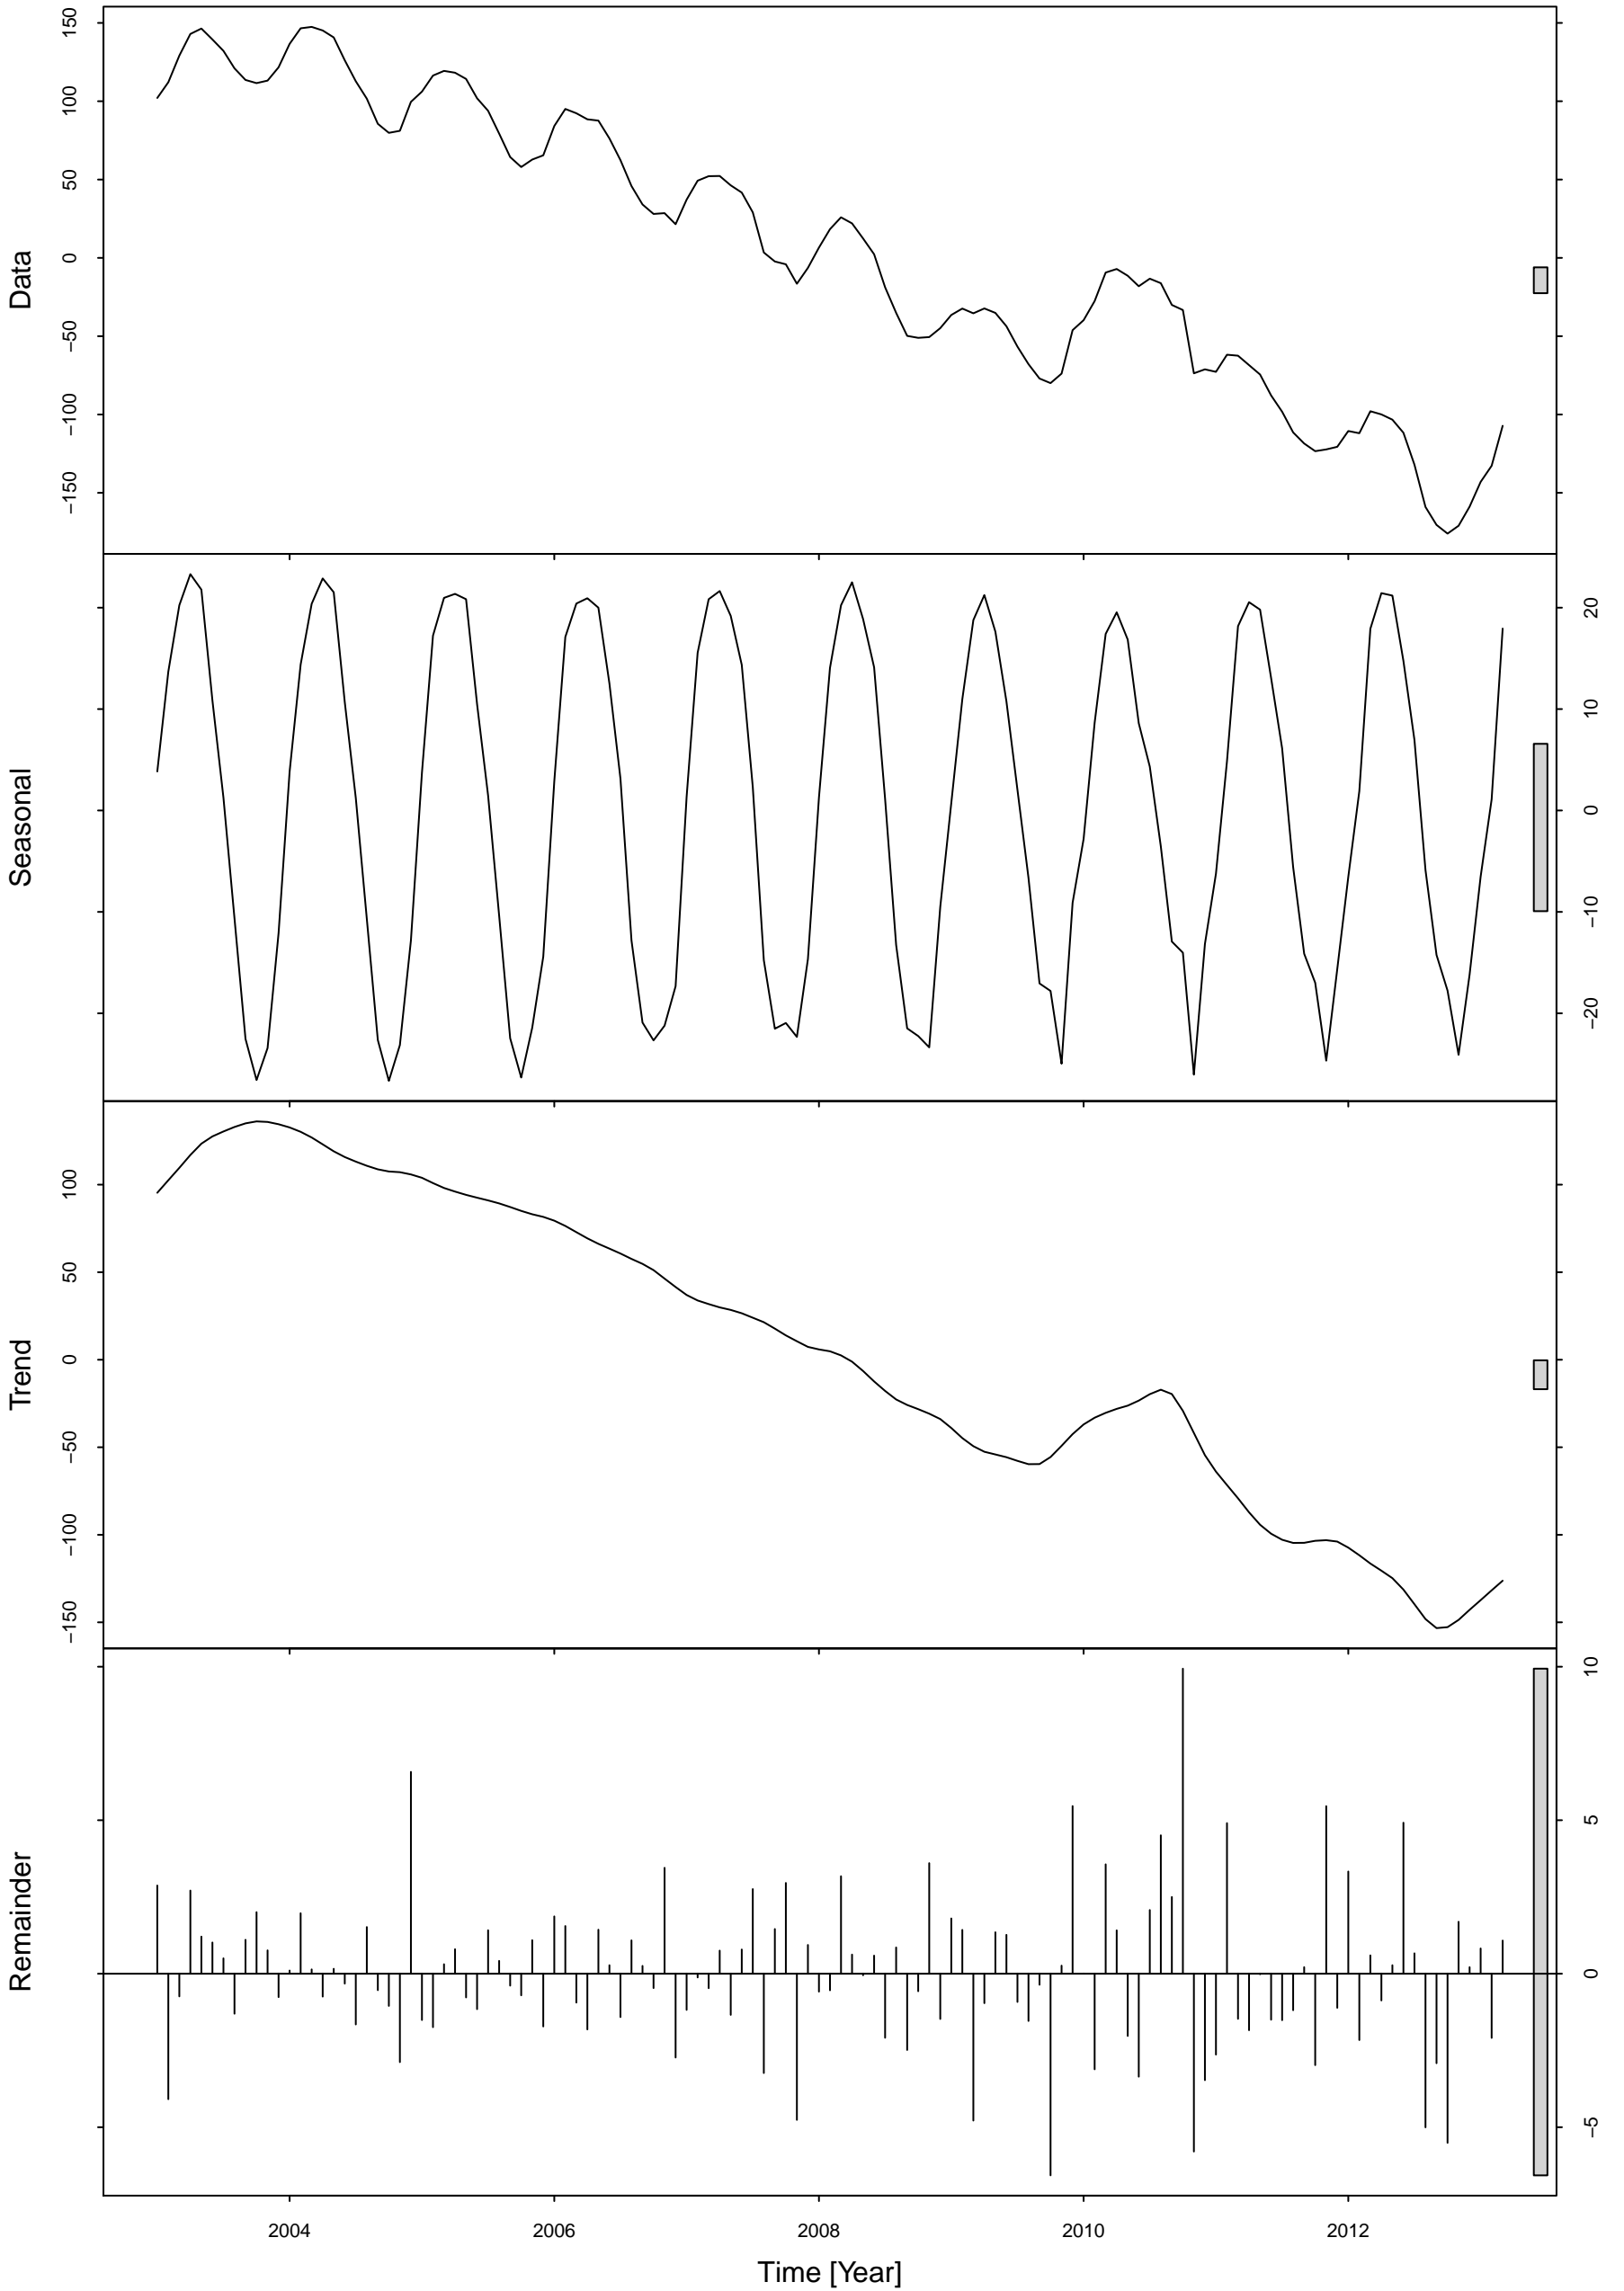

Decomposed groundwater level of AZ8

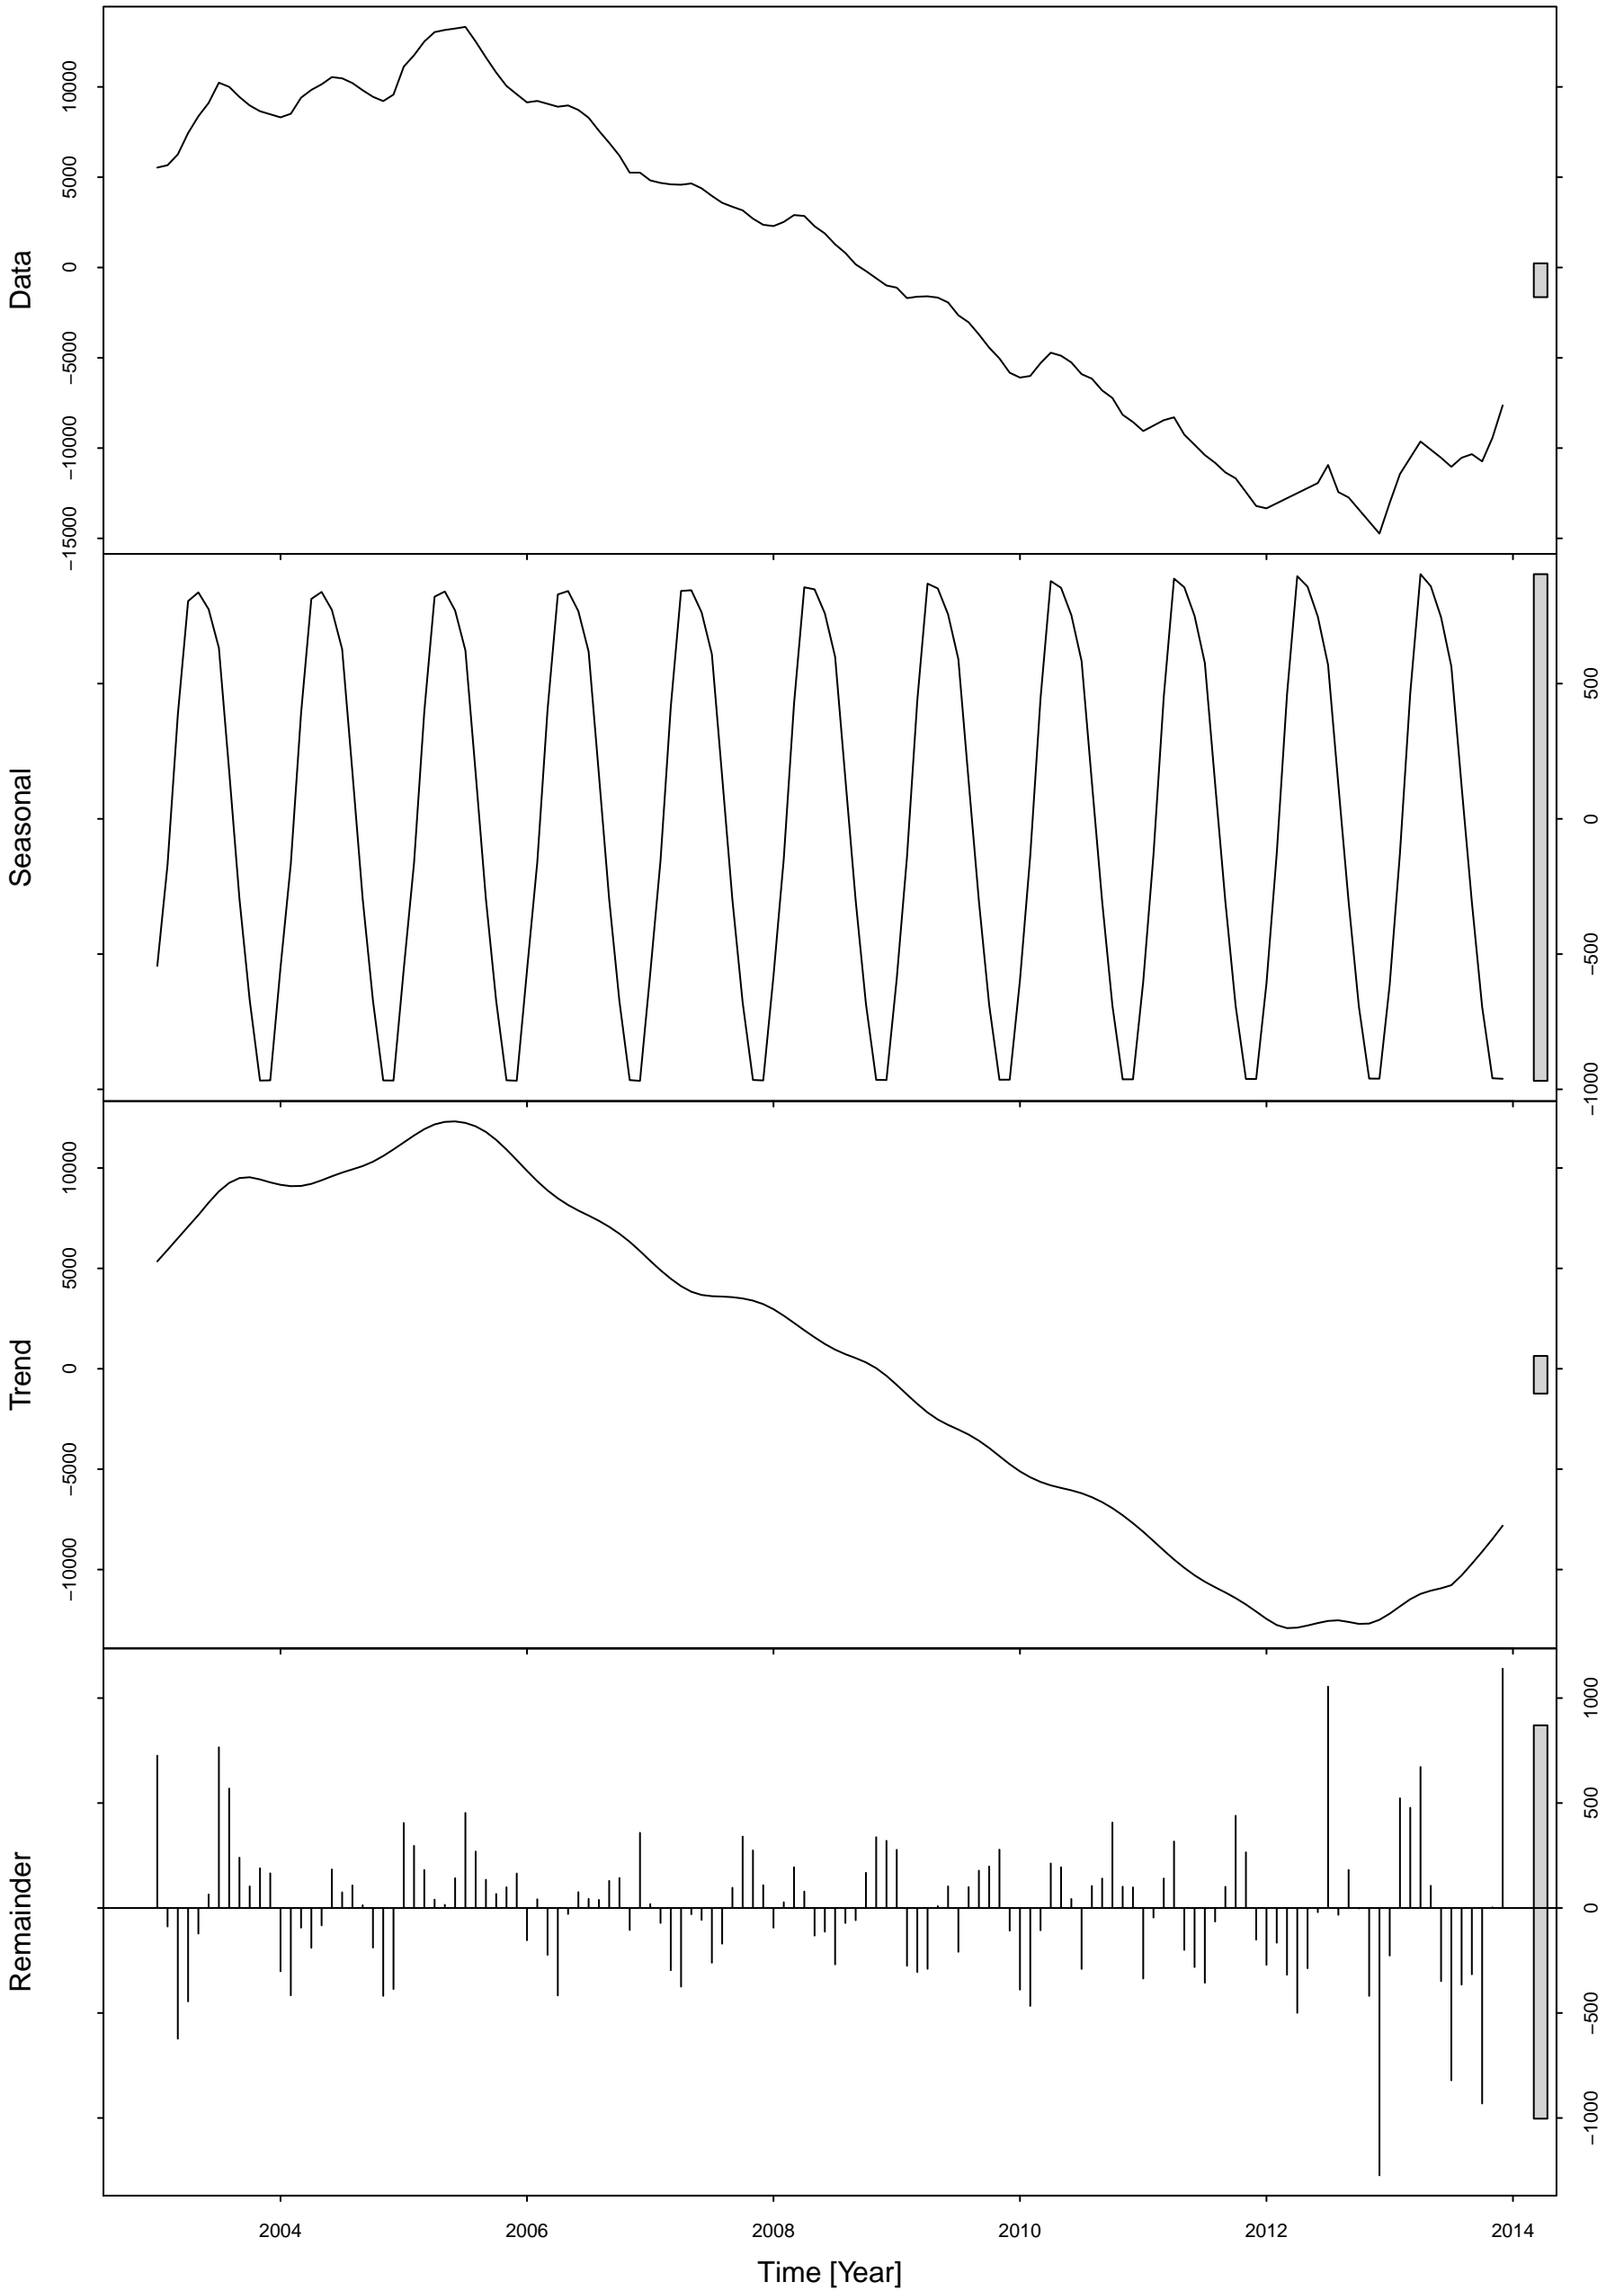

Decomposed averaged groundwater level of DS1-DS3

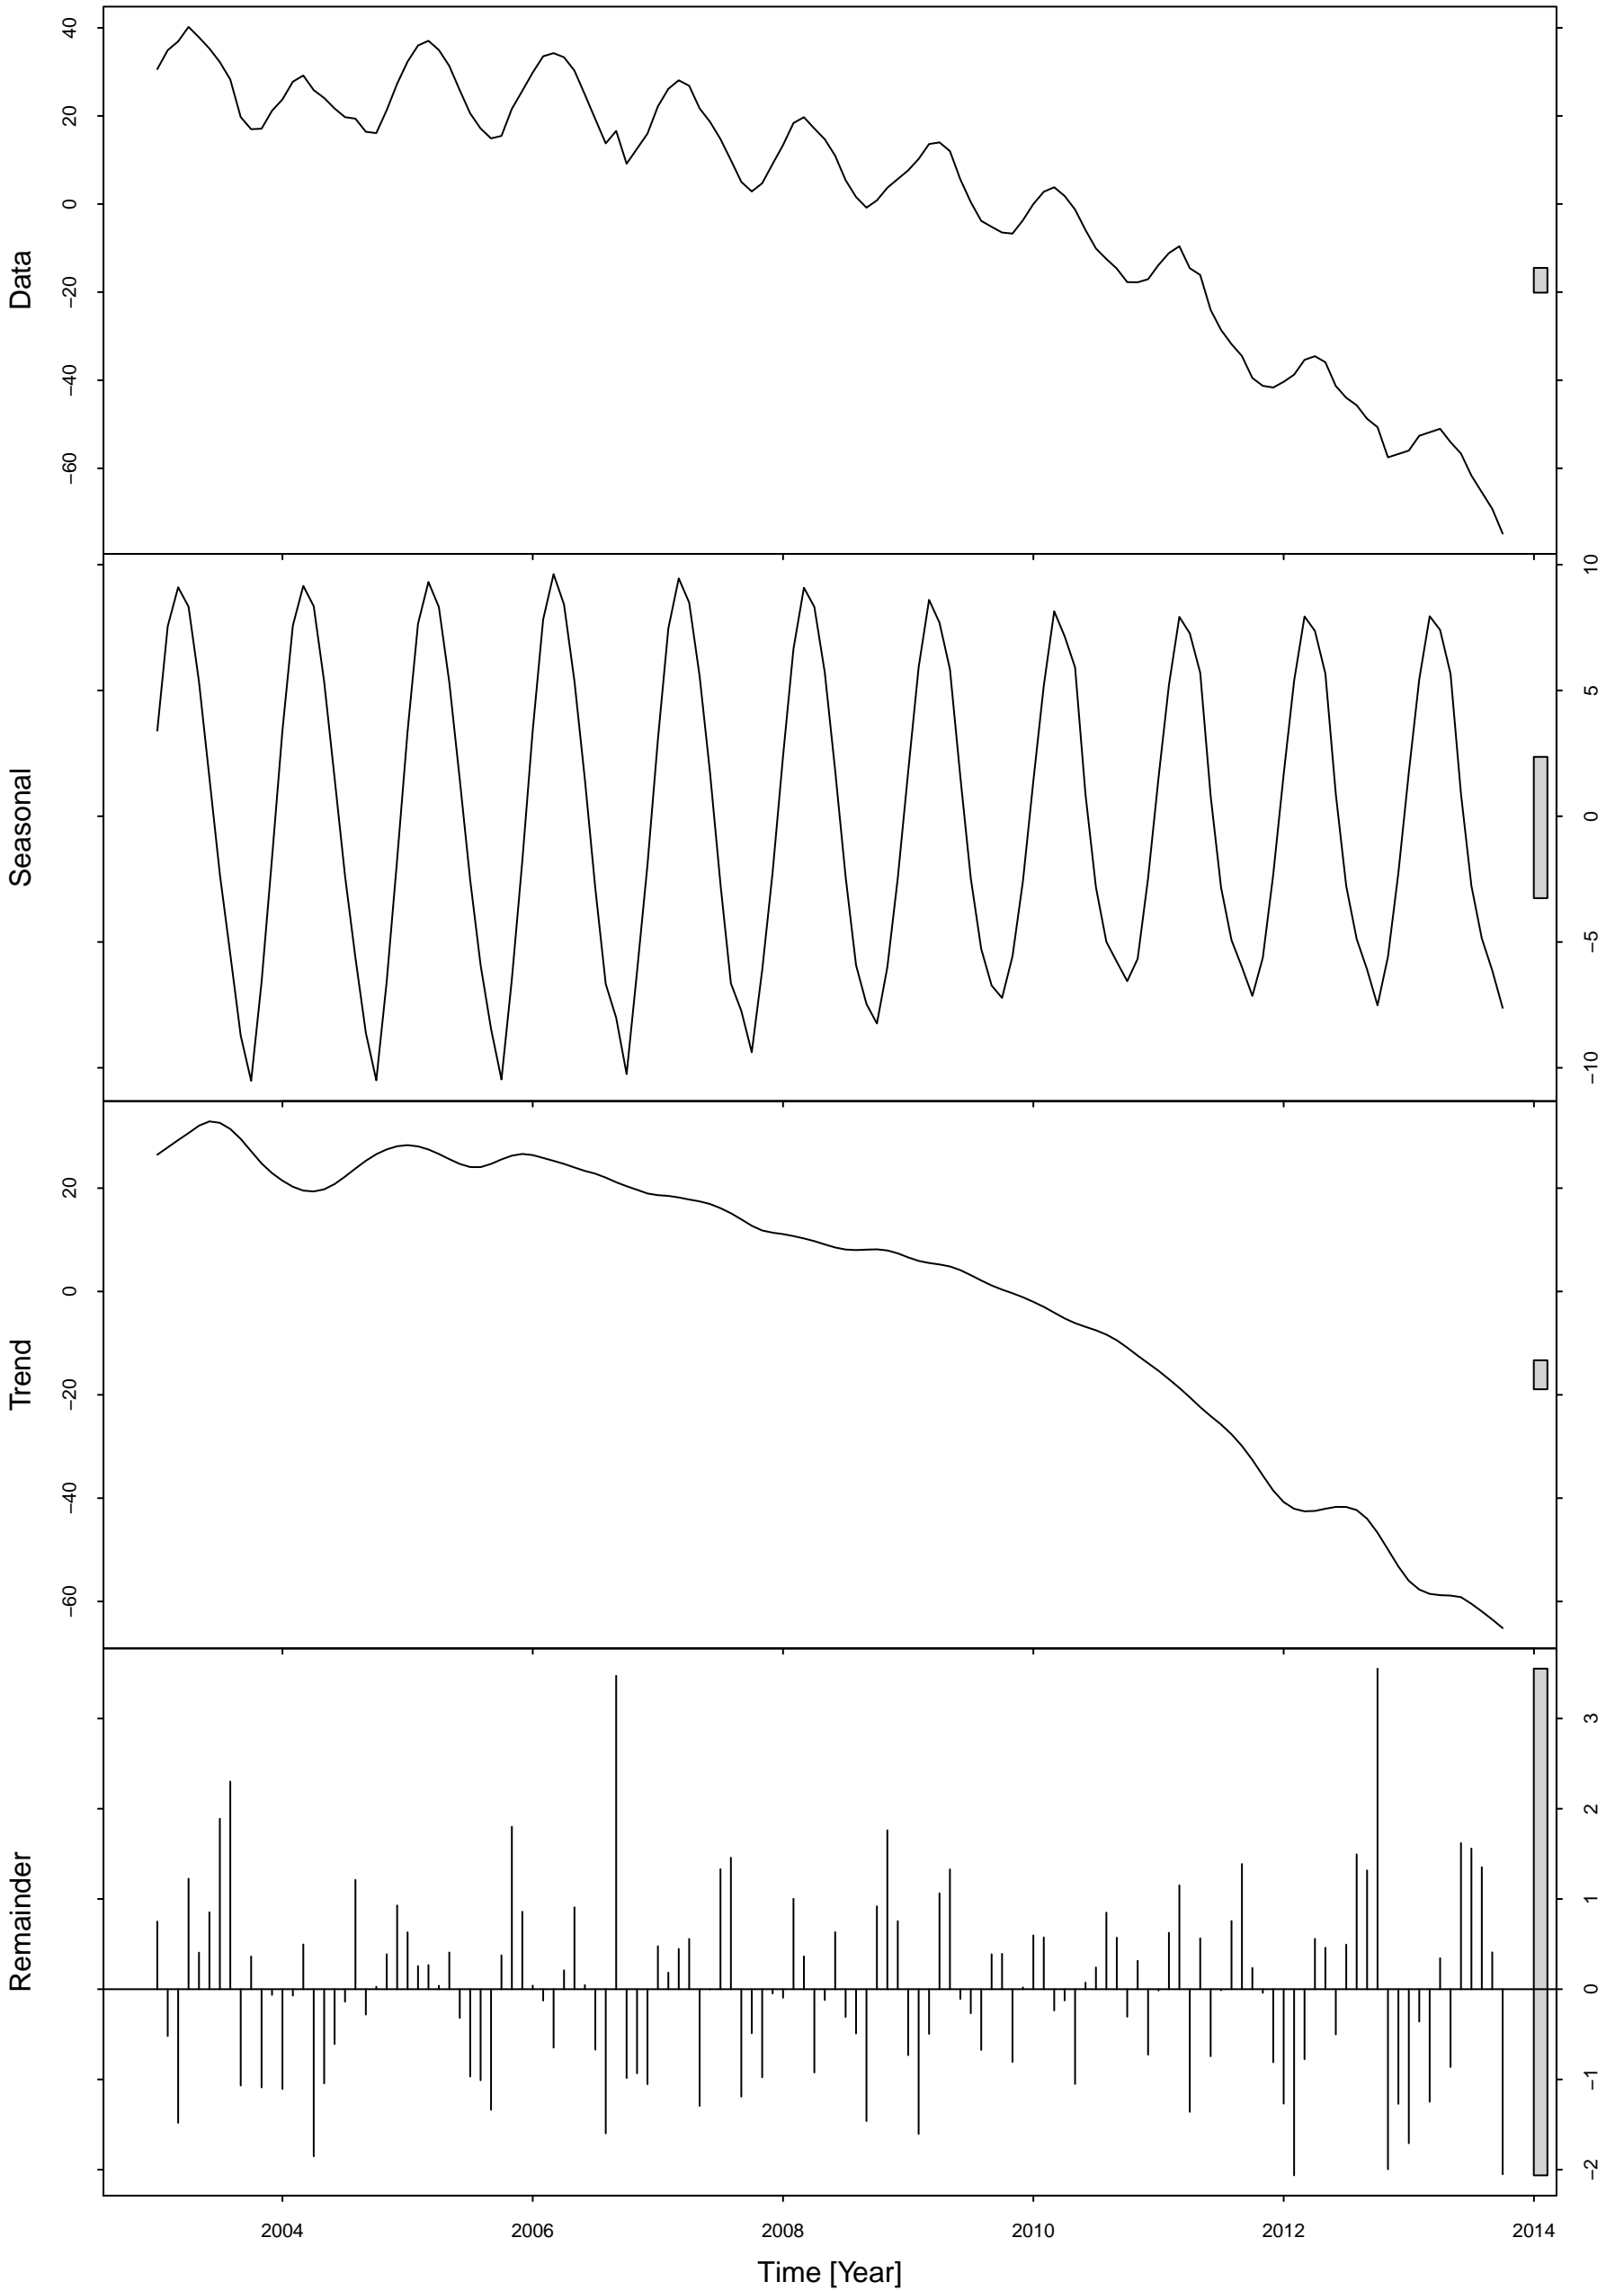

Decomposed groundwater level of DS4

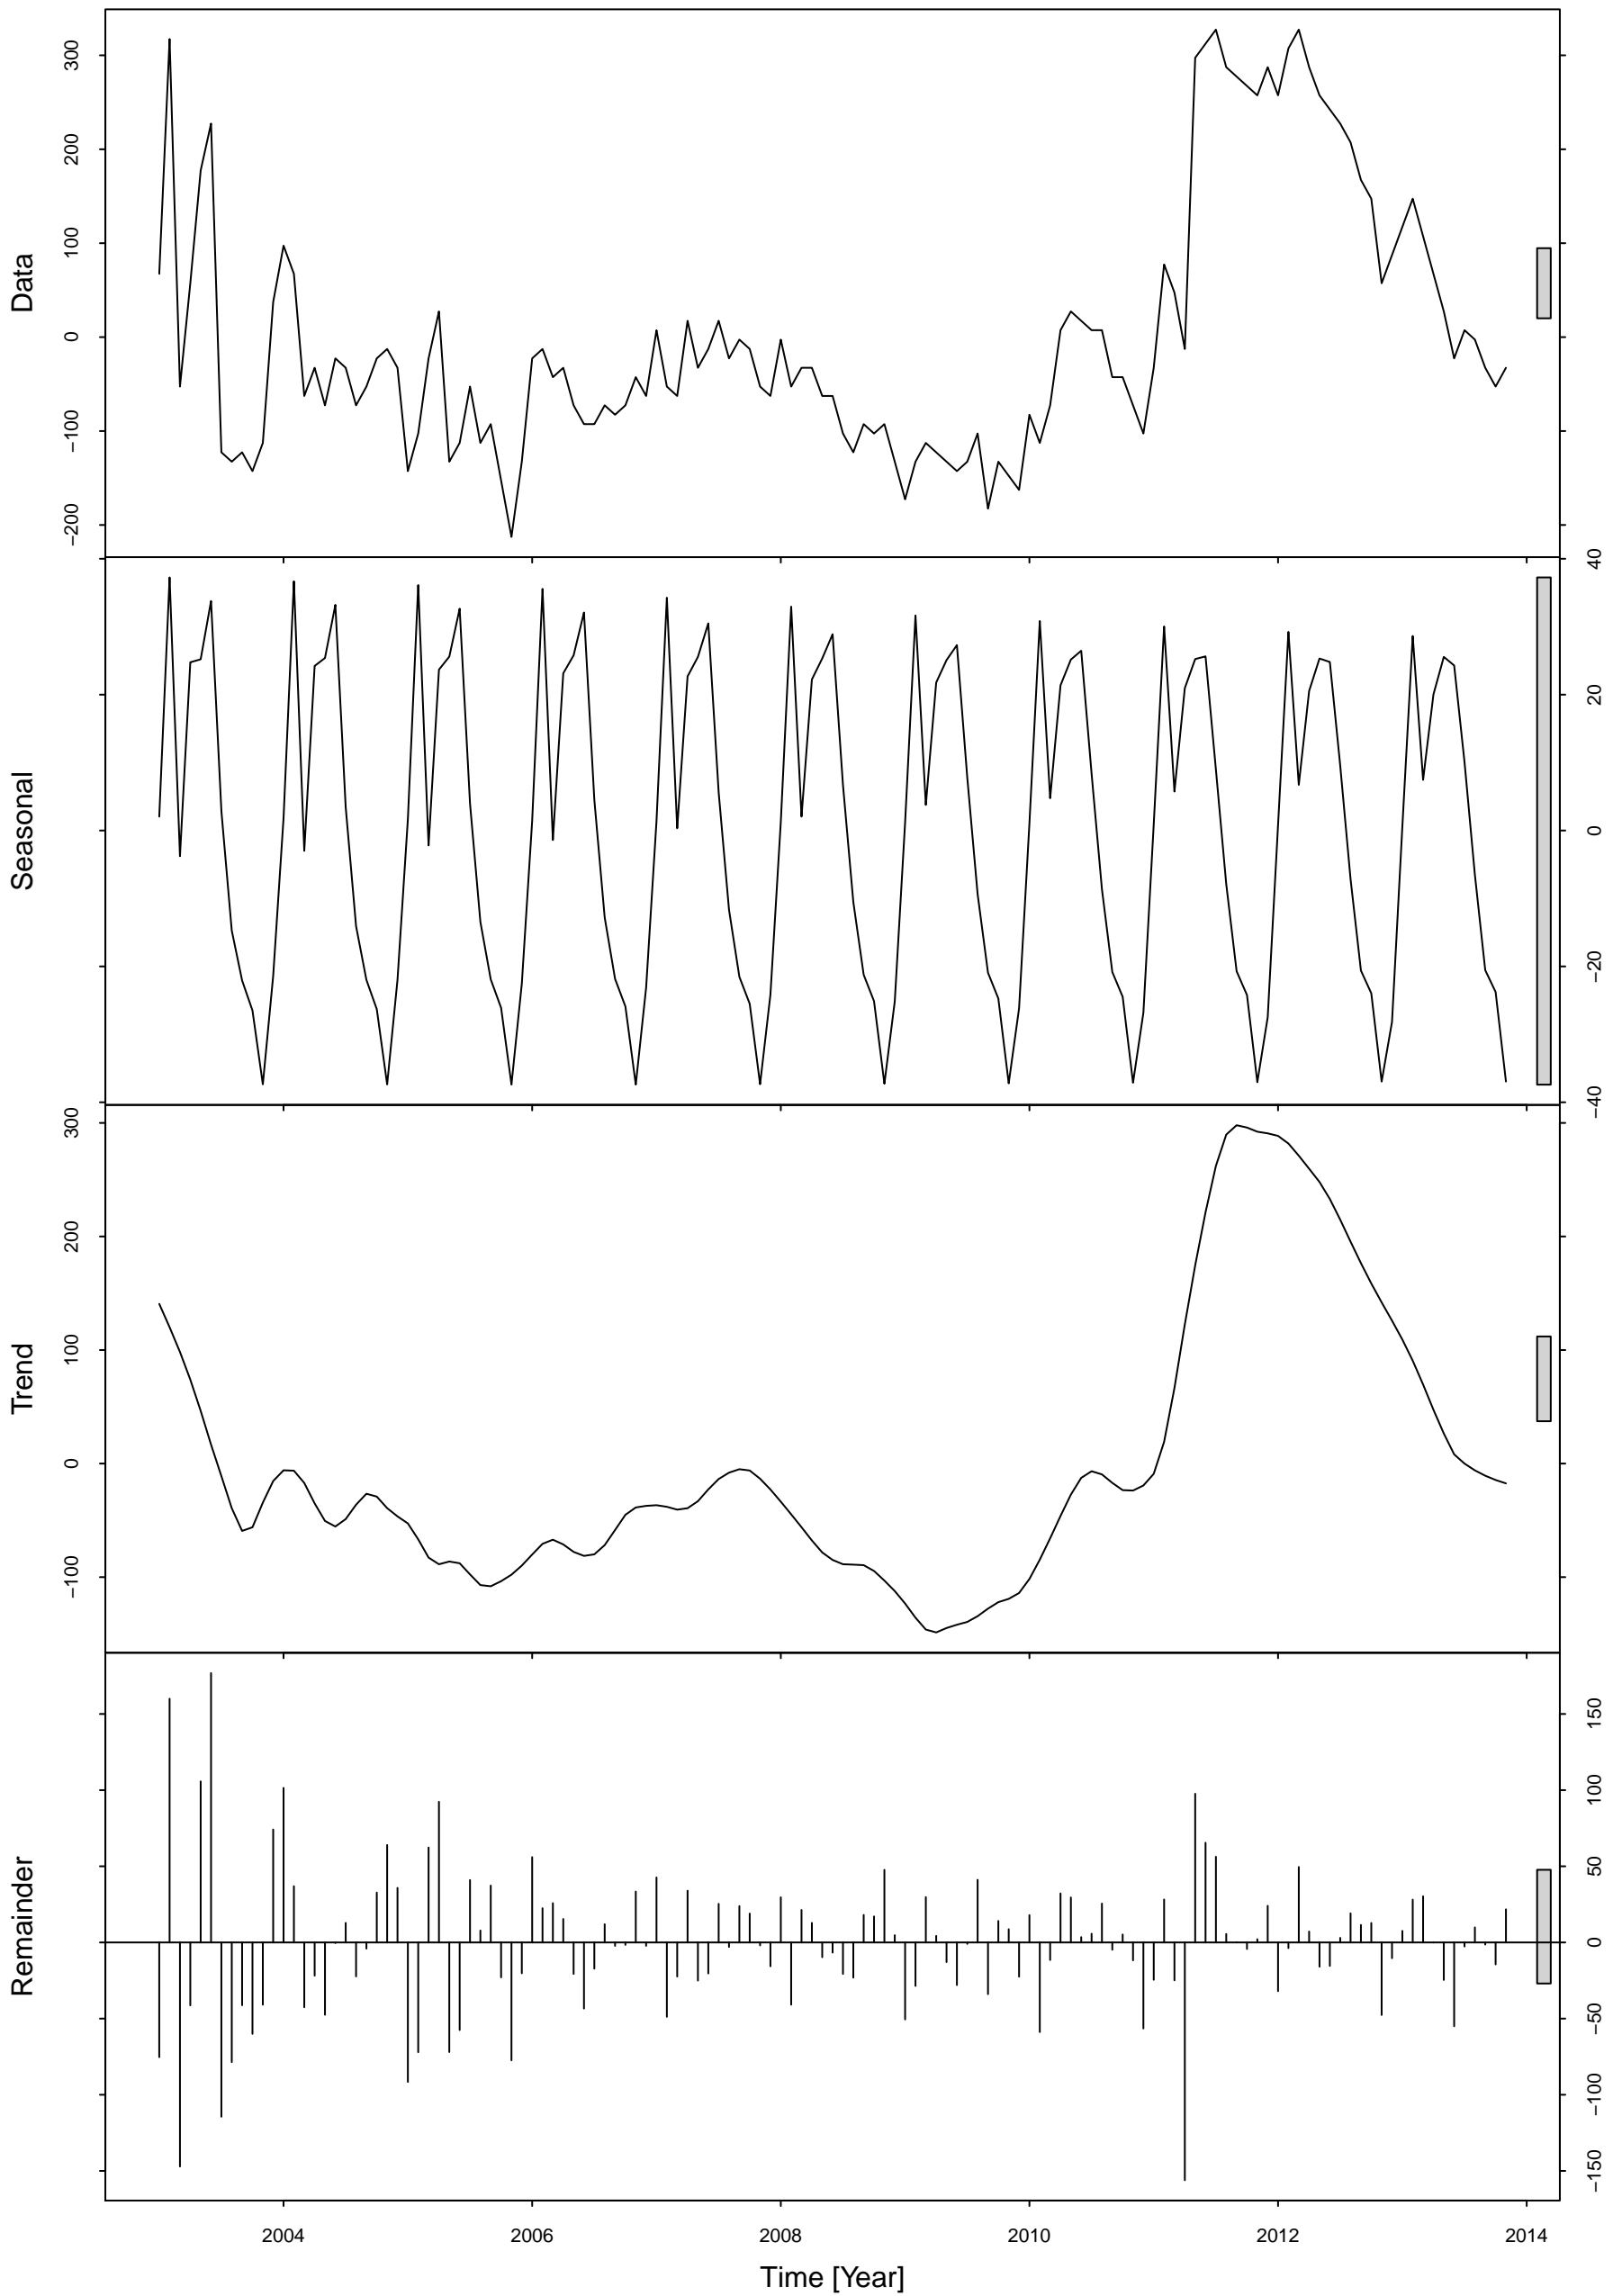



Decomposed groundwater level of SW1

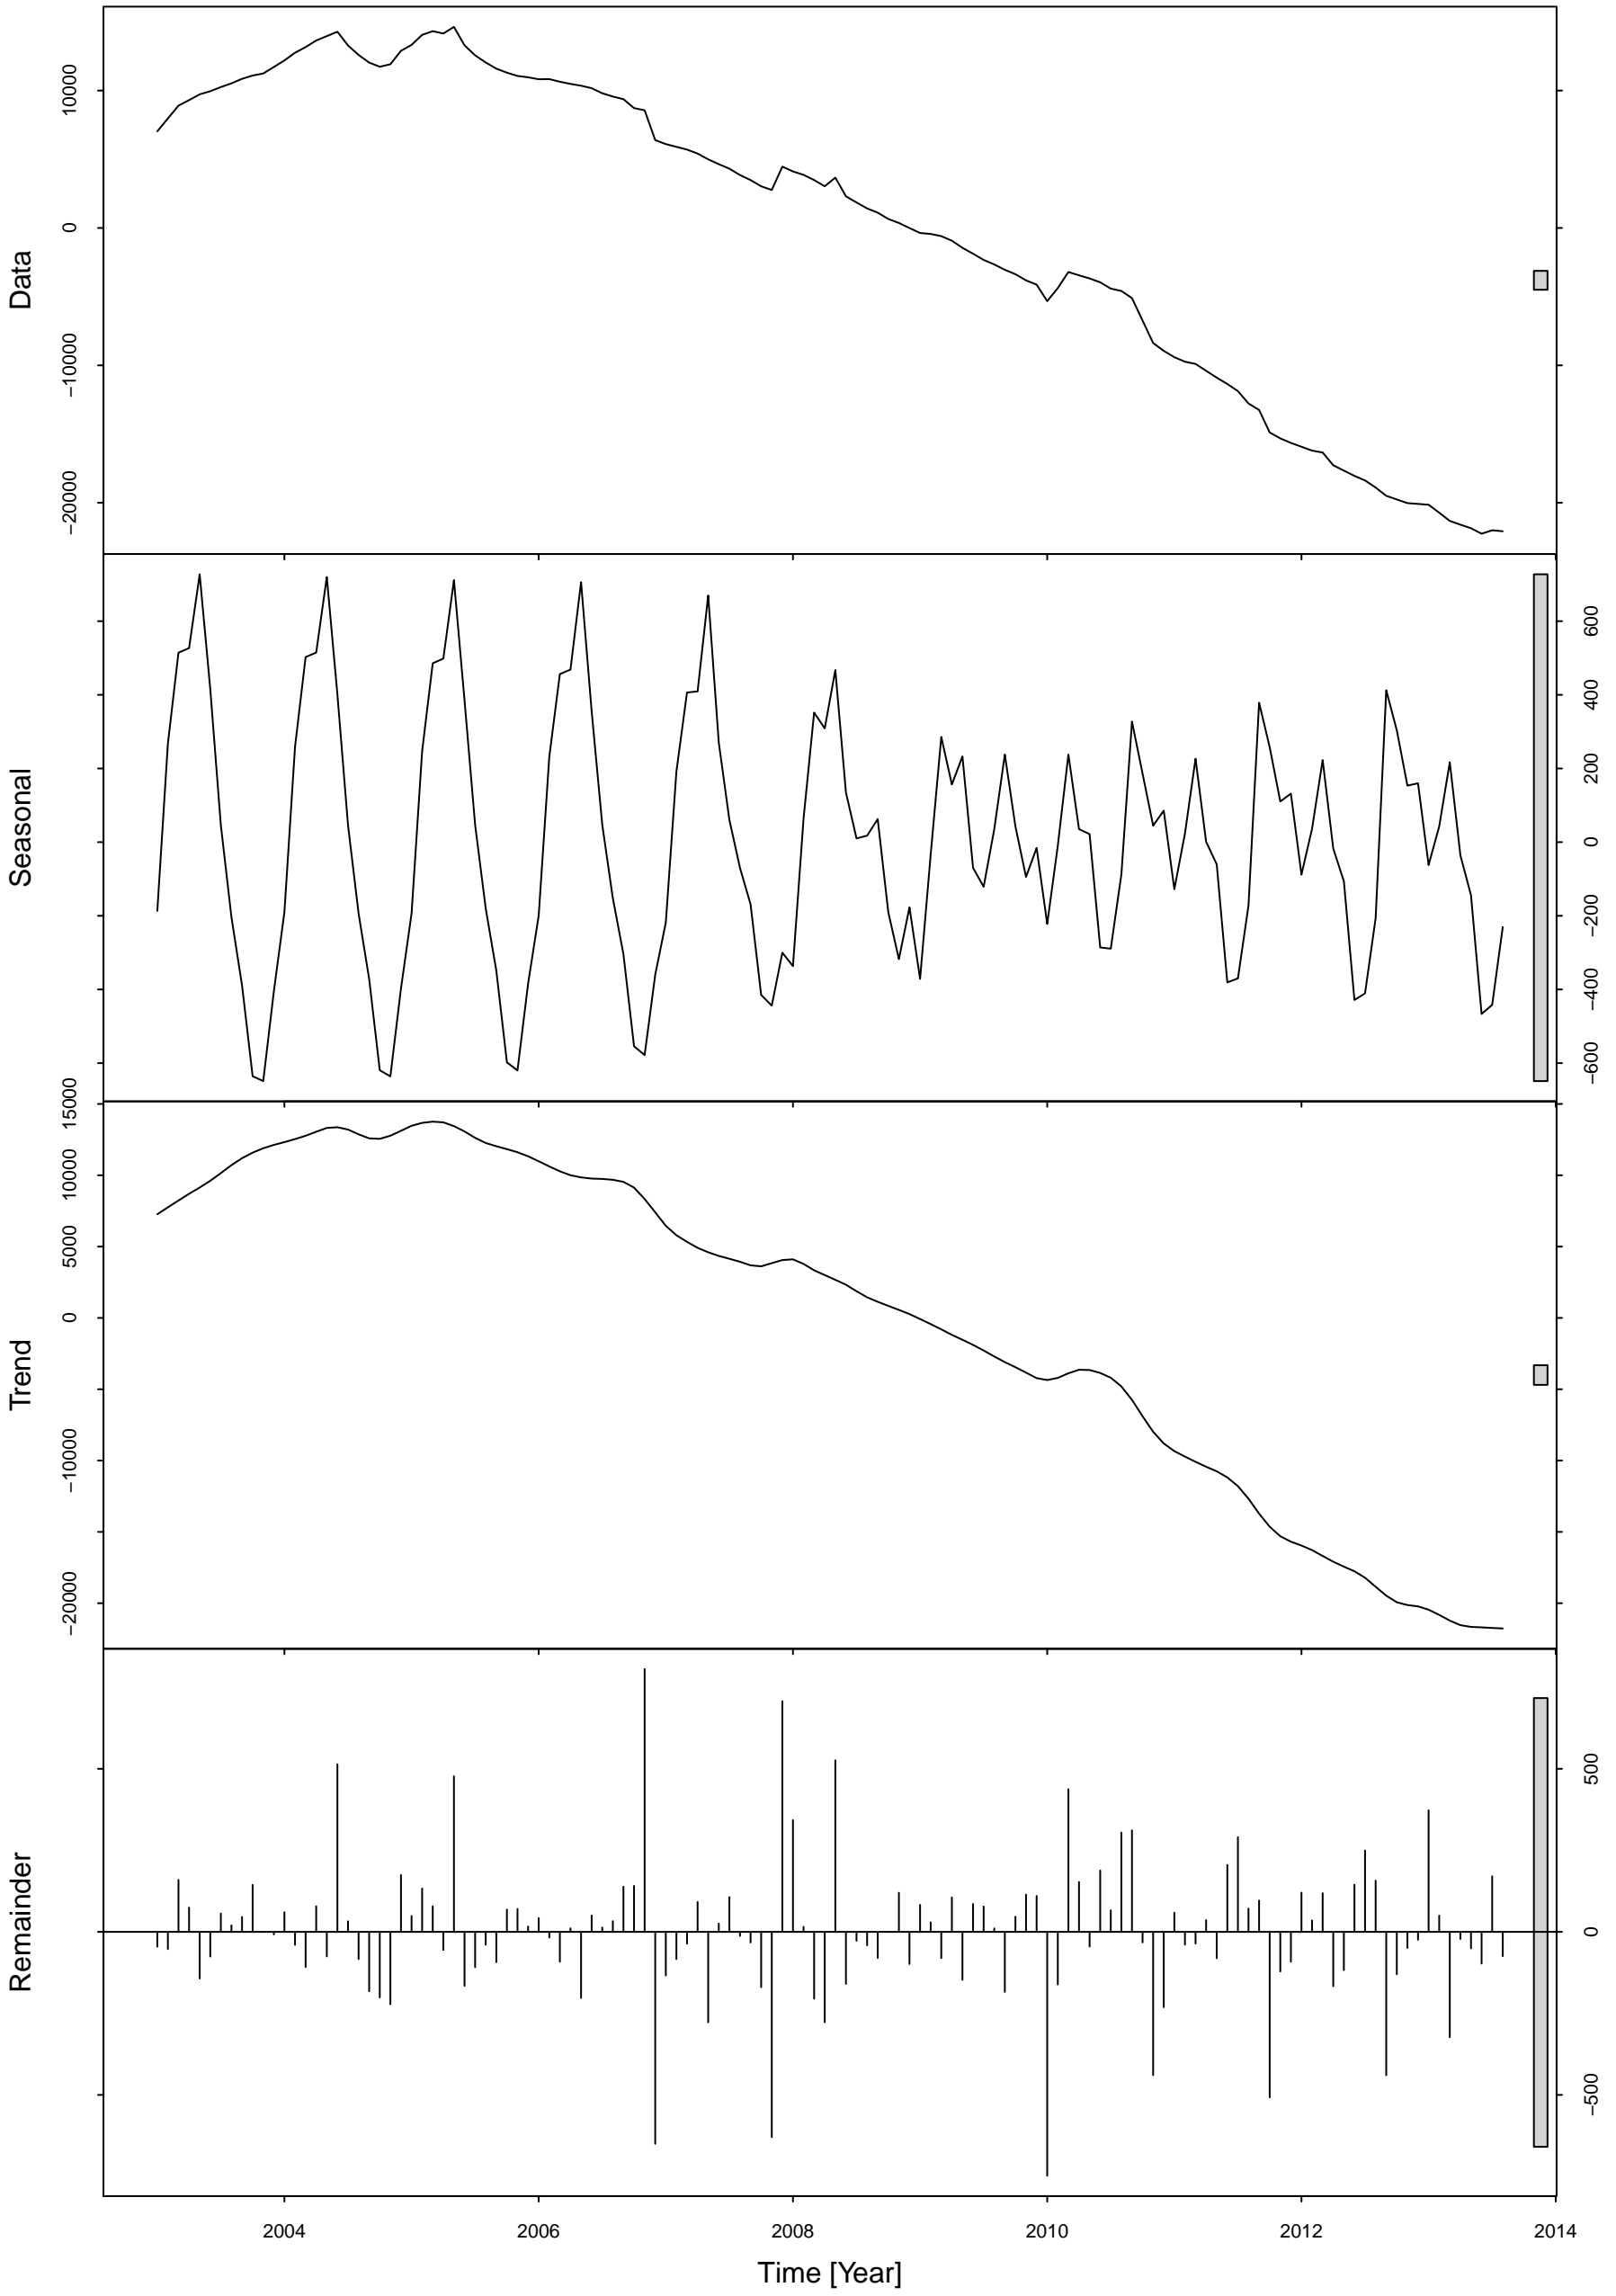

Decomposed groundwater level of SW2

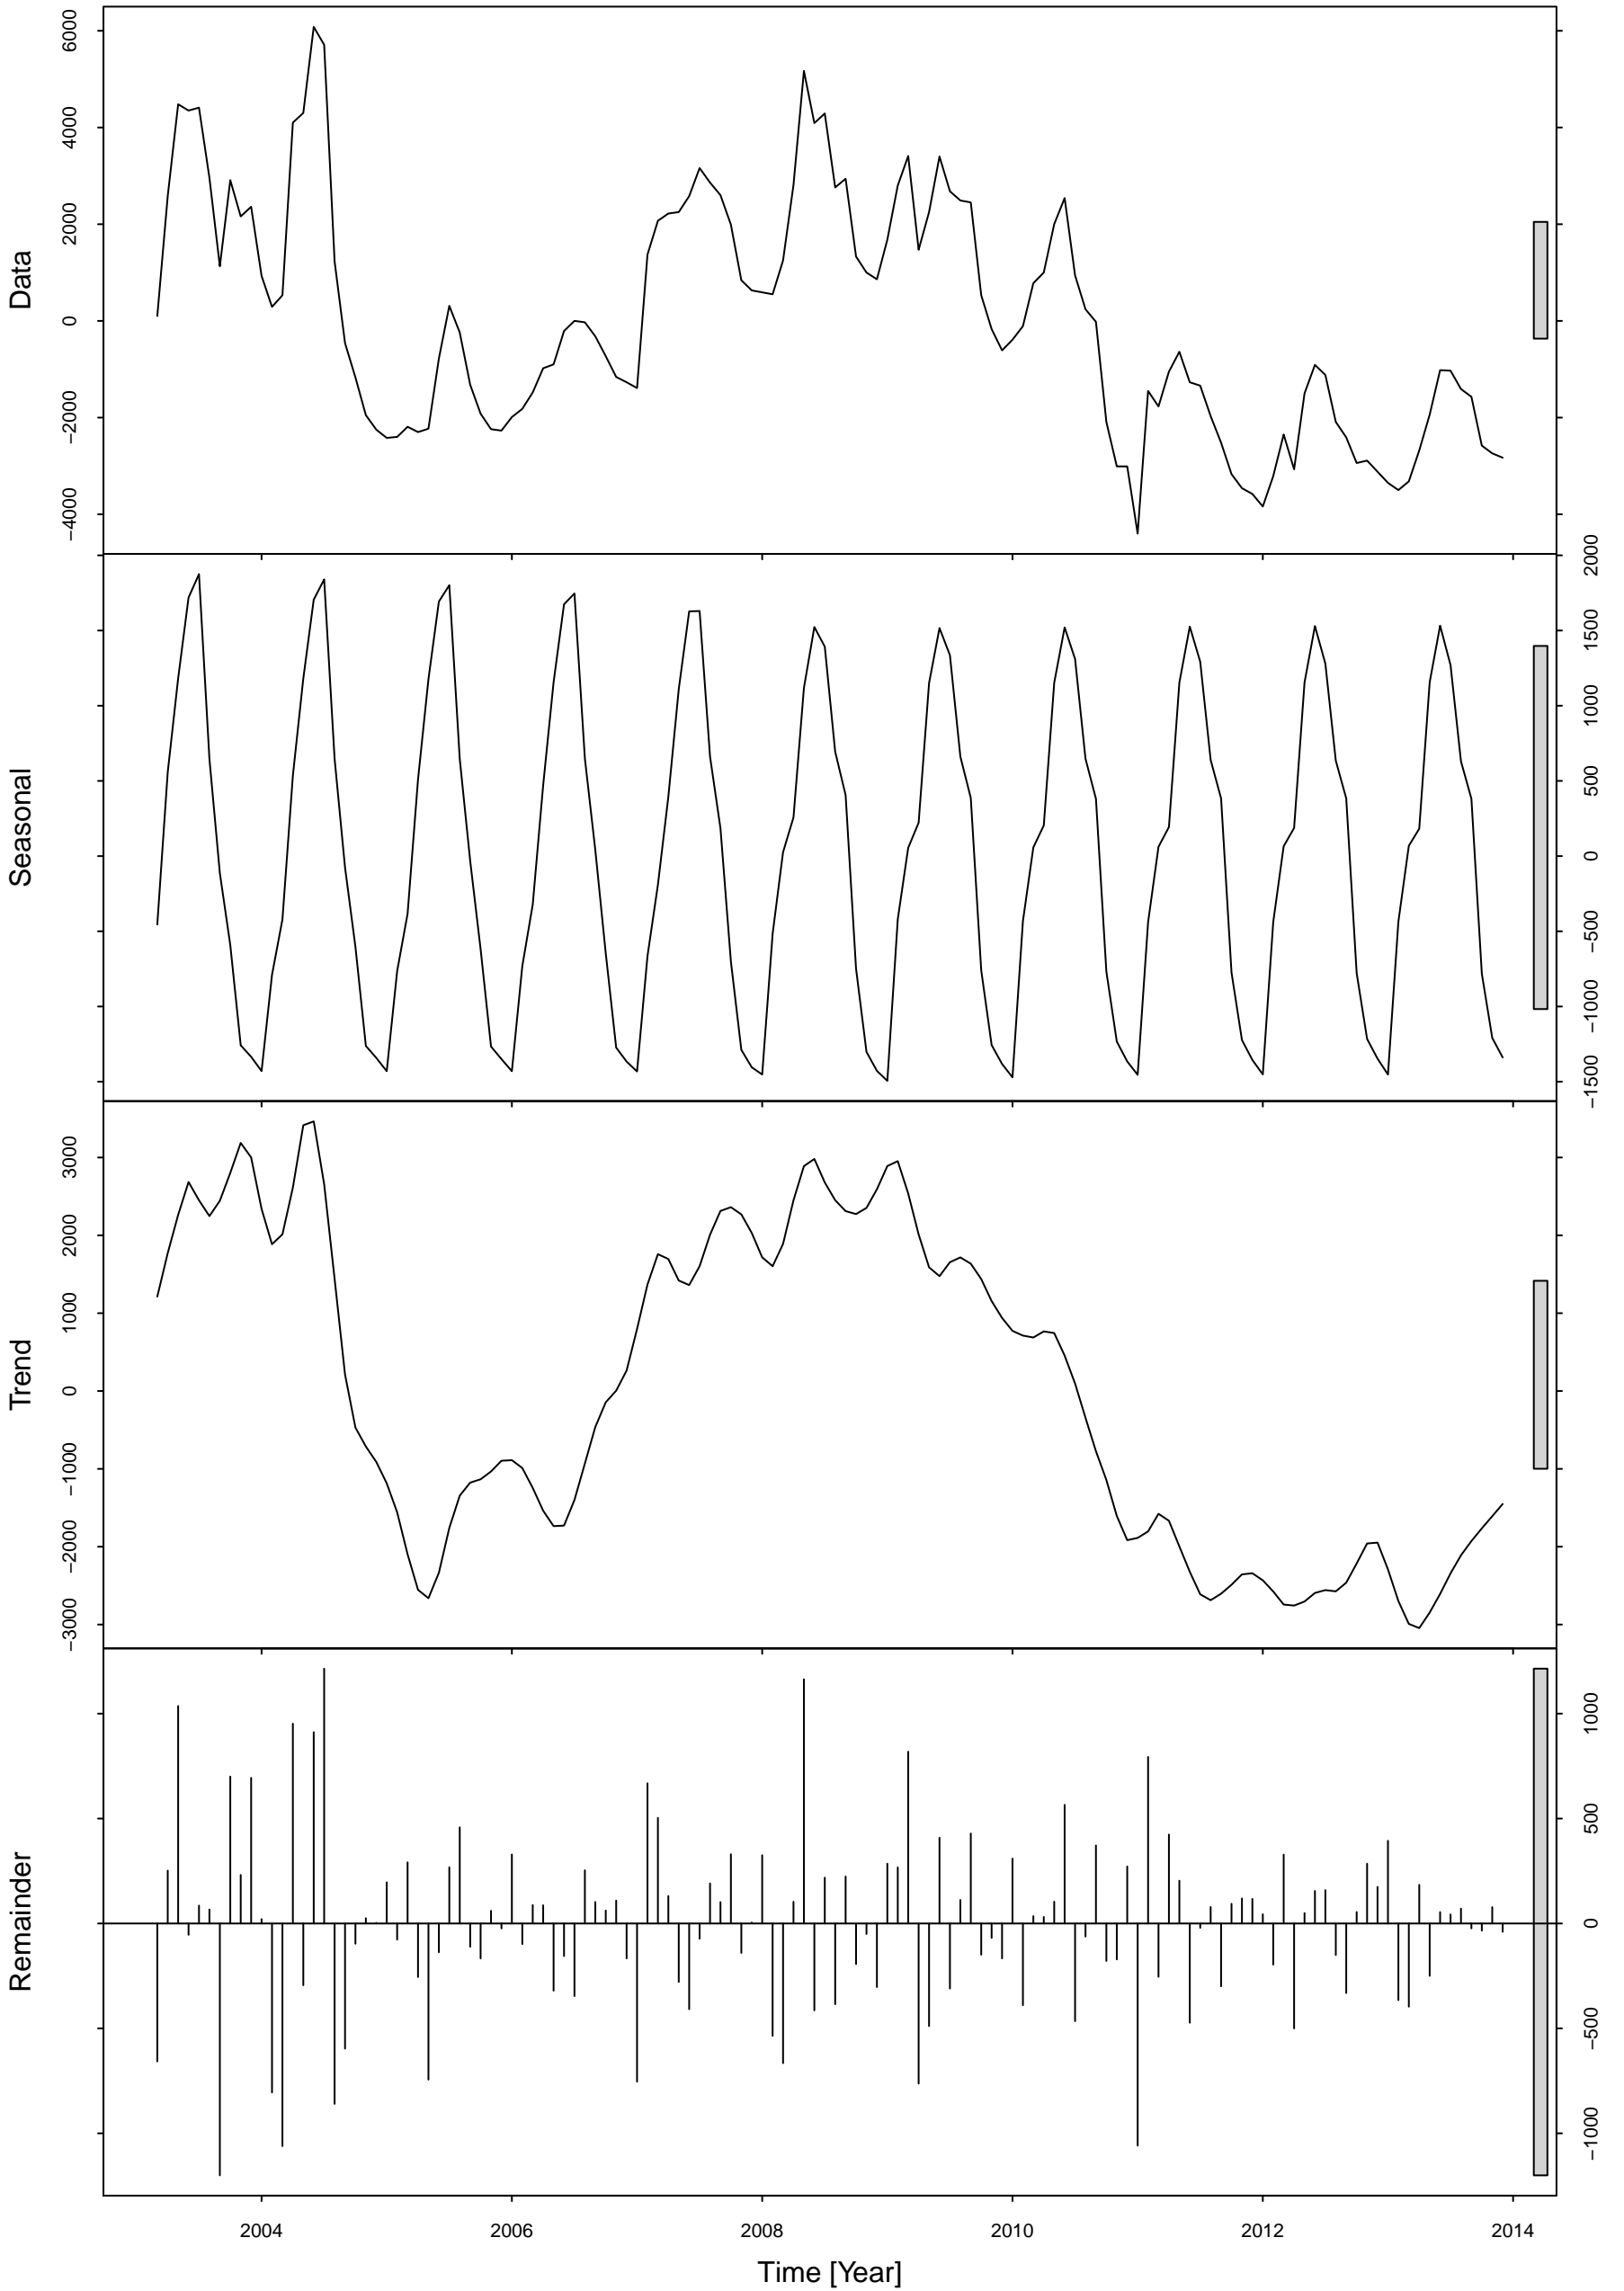

Decomposed averaged groundwater level of YM1-YM2

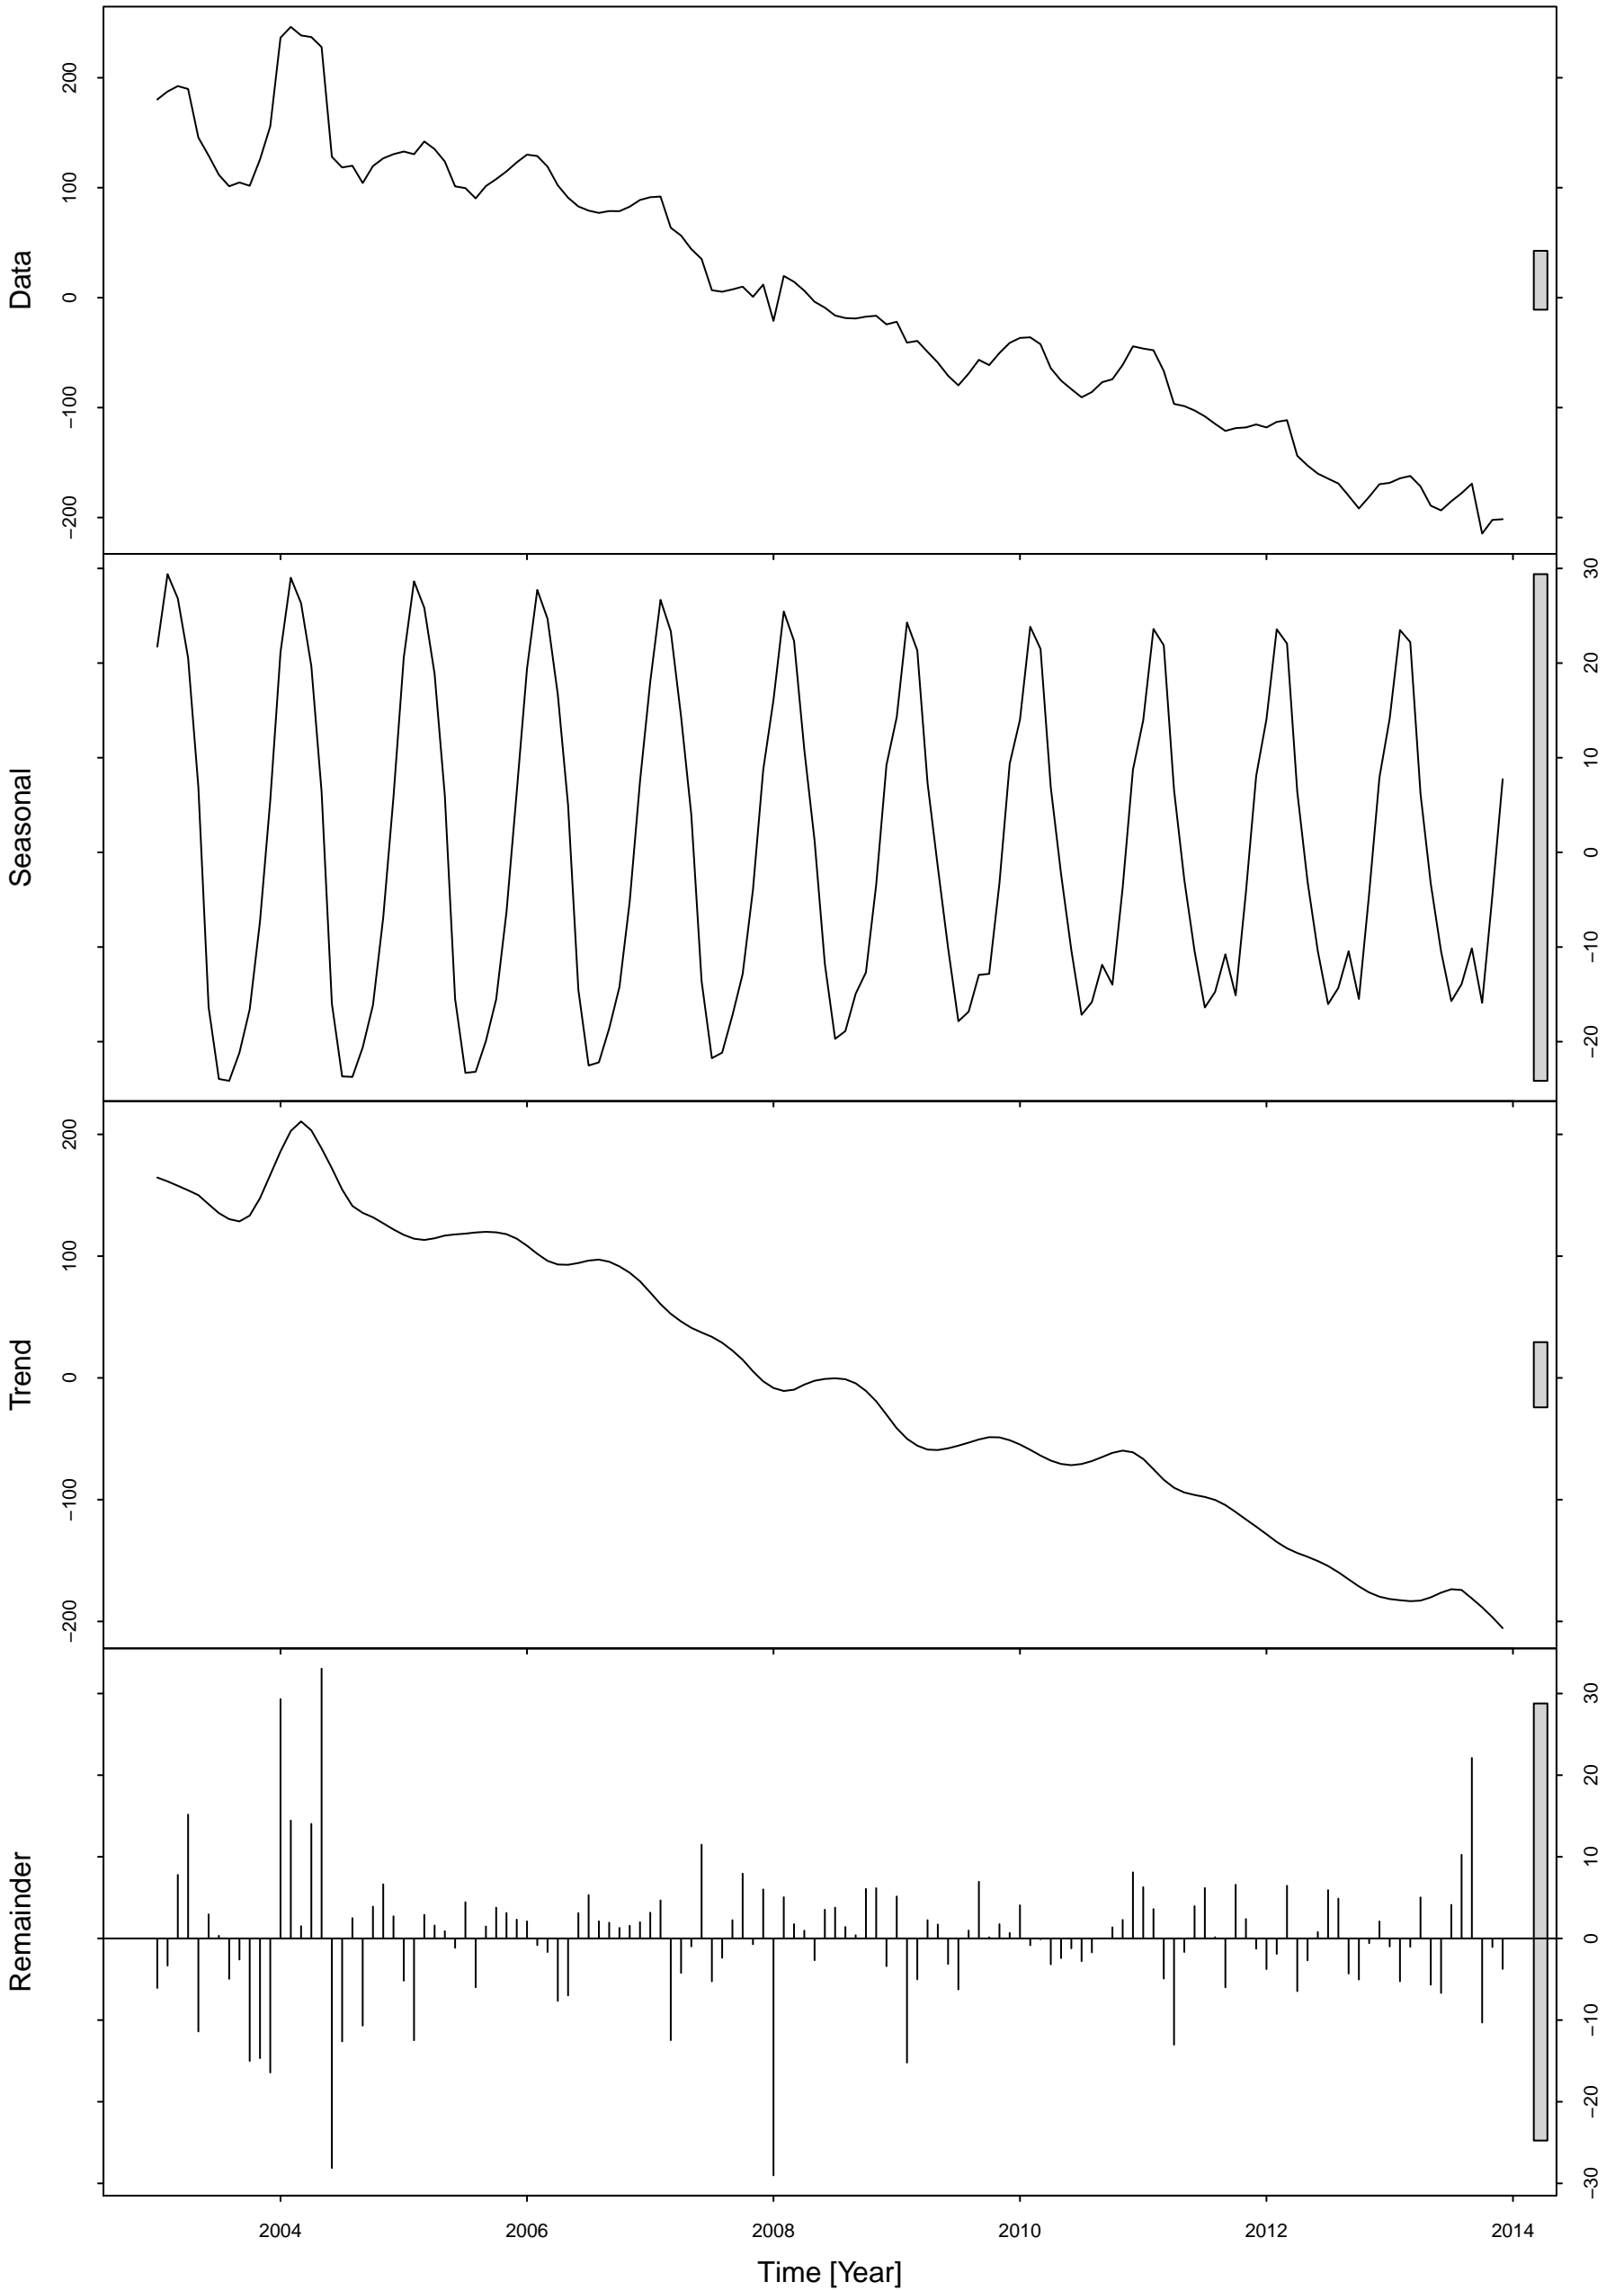

Decomposed groundwater level of YM3

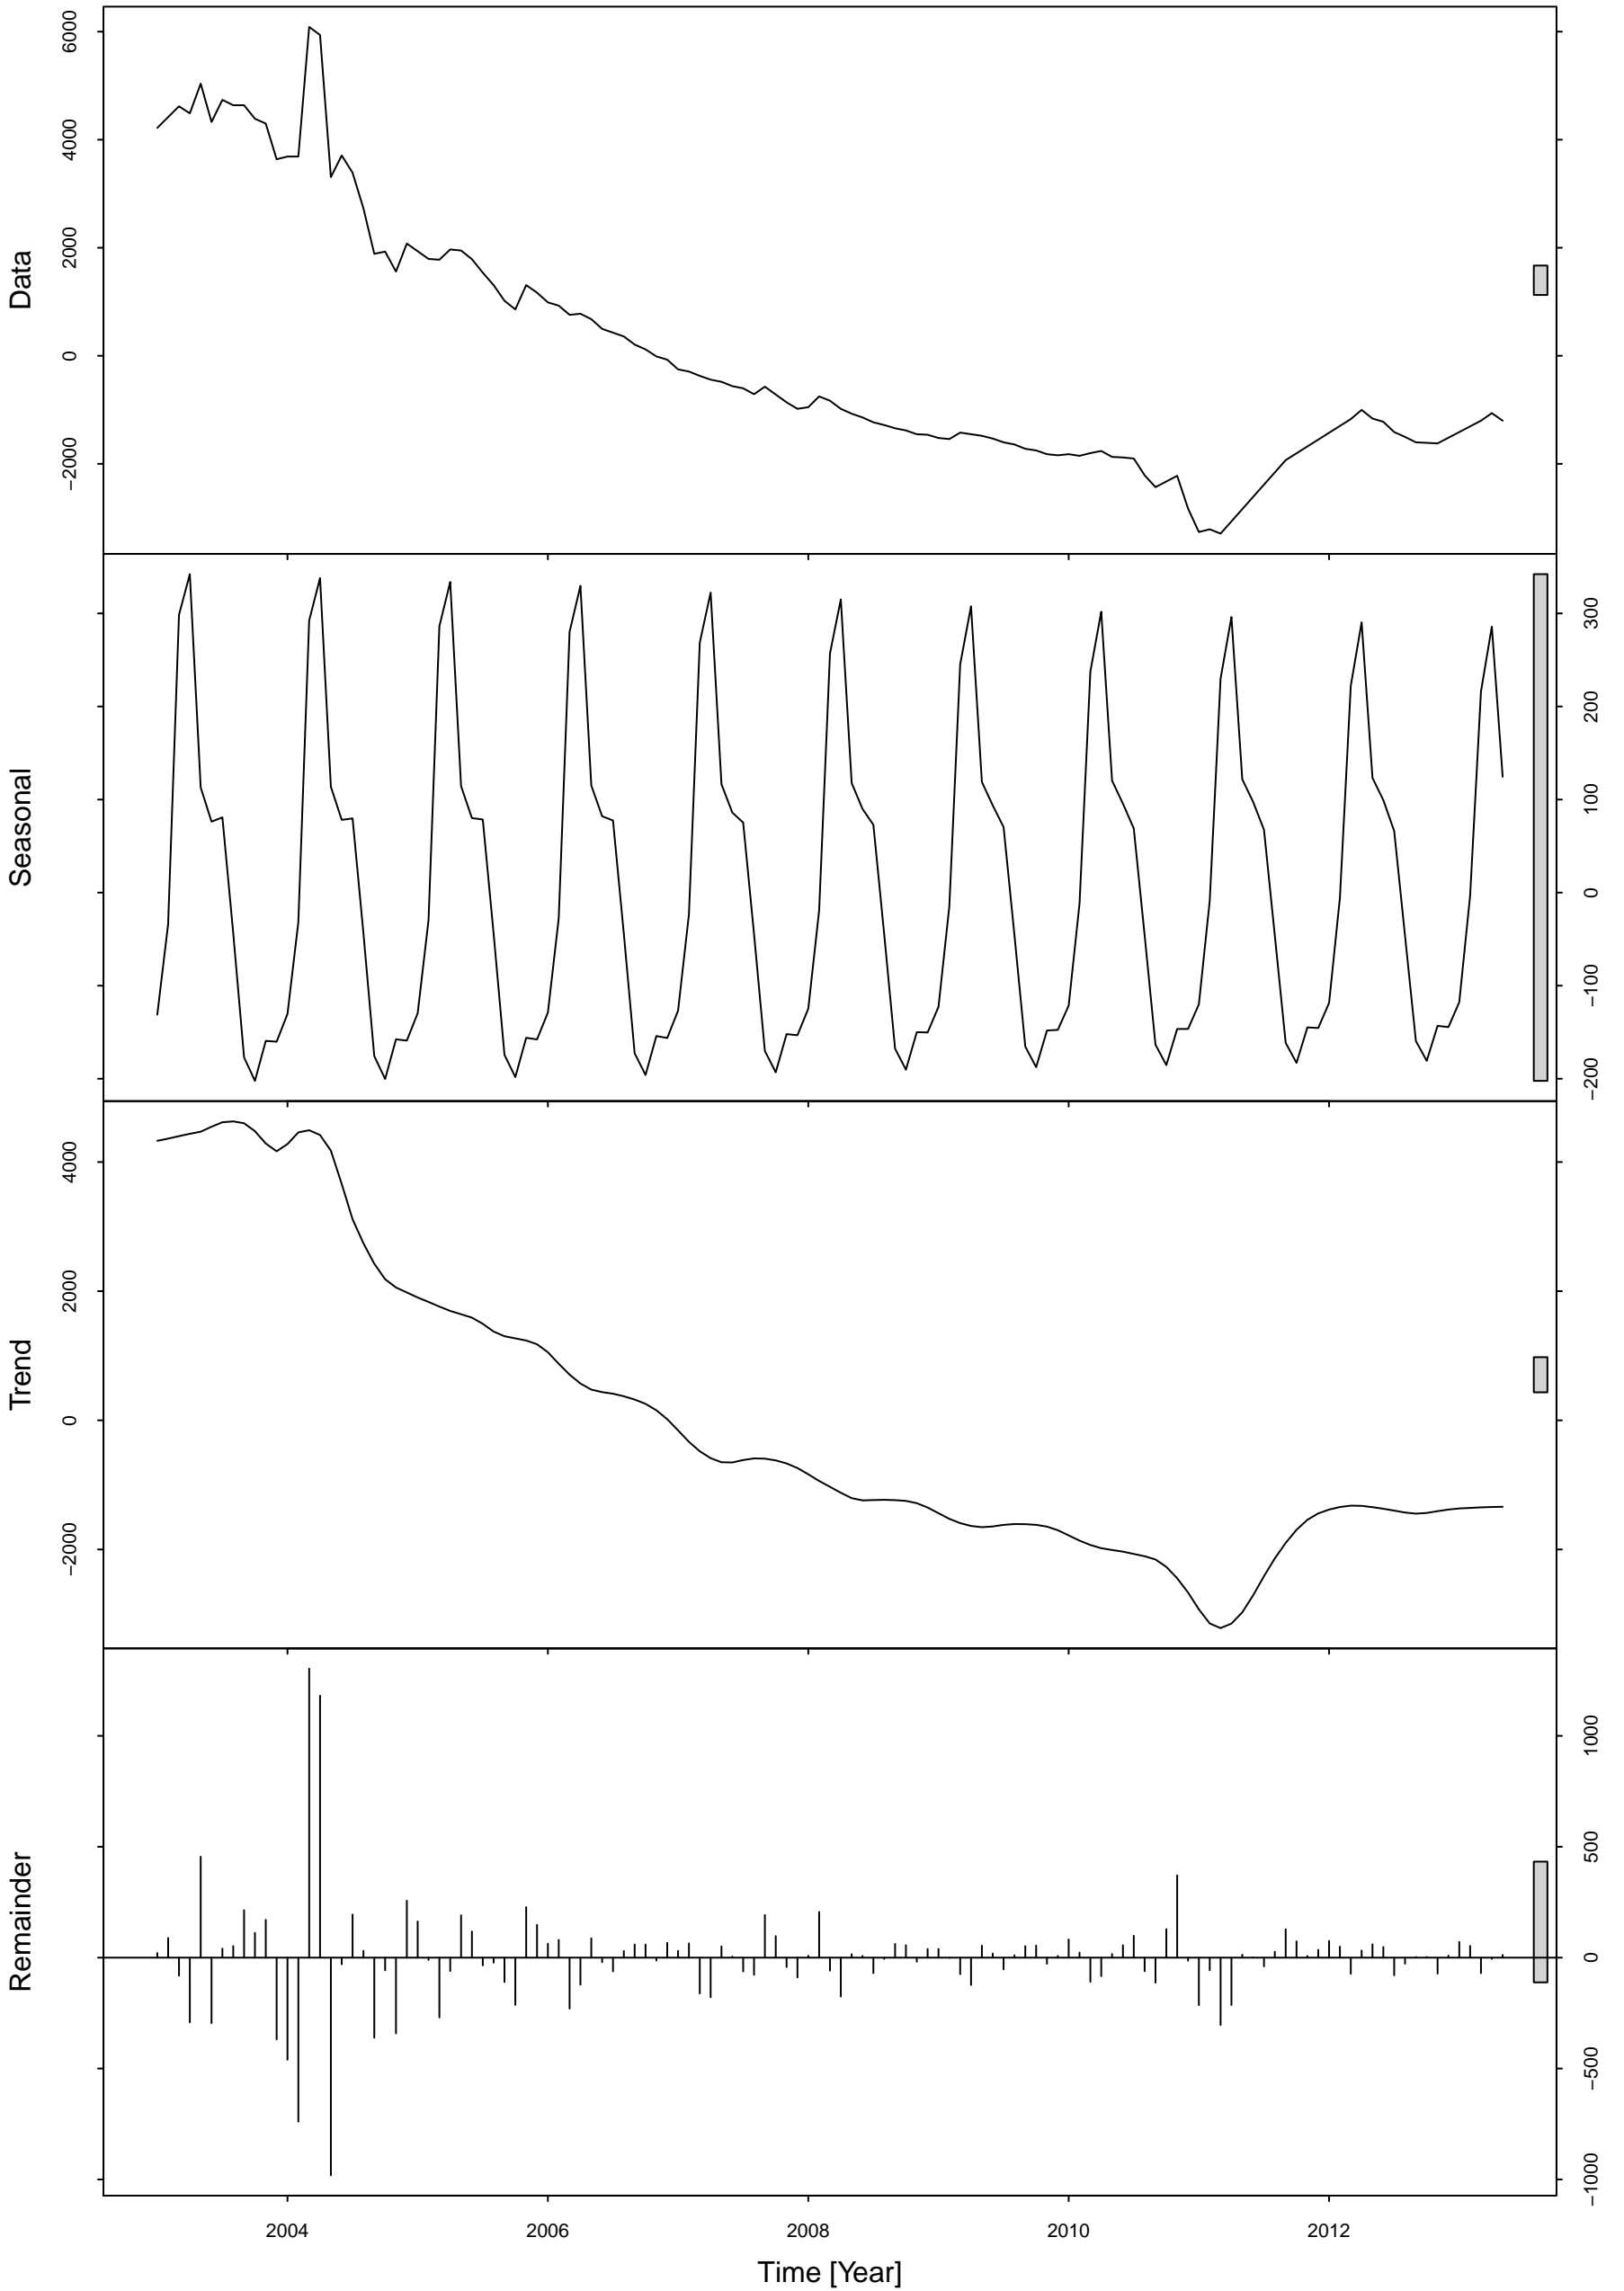

**ccf SM-TRMM Azraq**

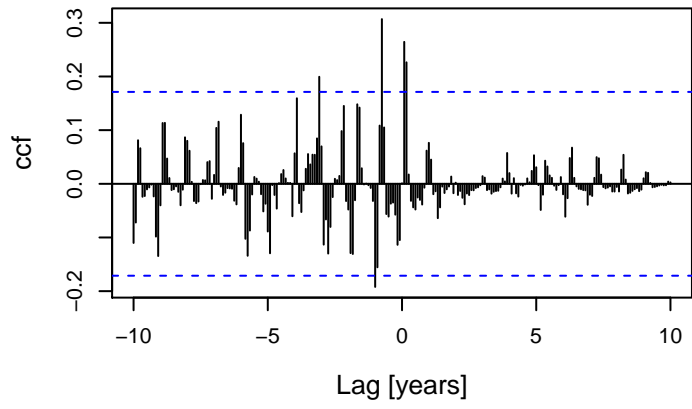

**ccf SM-TRMM Amman-Zarqa**

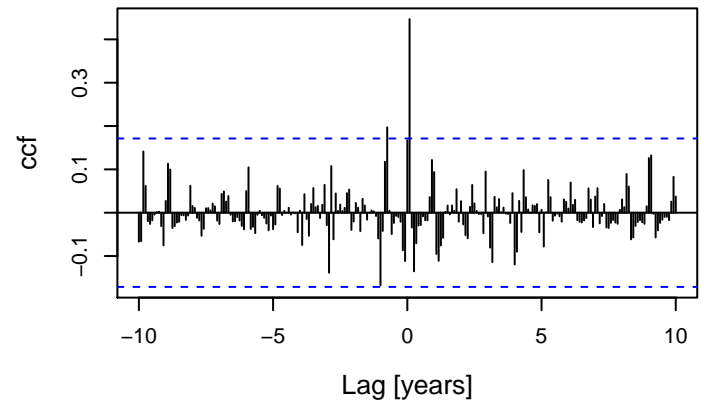

**ccf SM-TRMM Dead Sea**

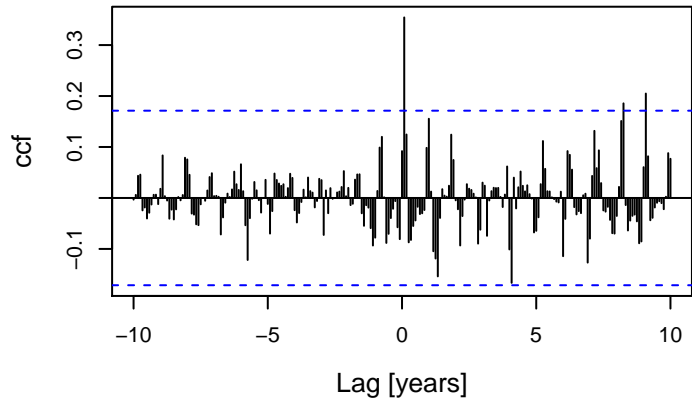

**ccf SM-TRMM Side Wadis**

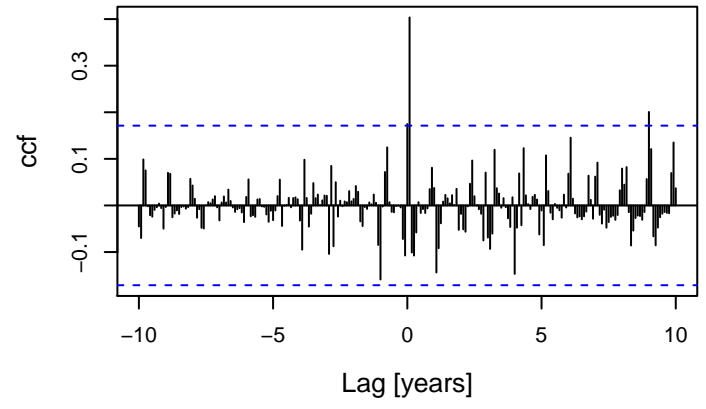

**ccf SM-TRMM Yarmouk**

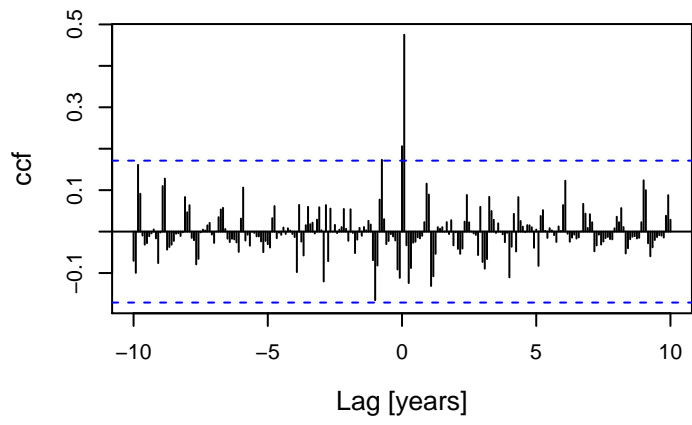

**ccf SM-MERRA Azraq**

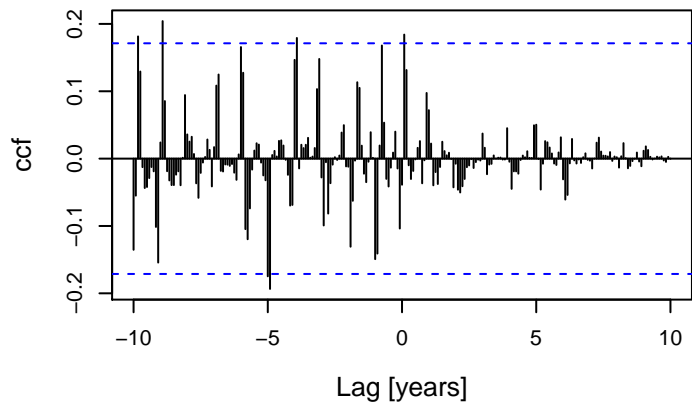

**ccf SM-MERRA Amman-Zarqa**

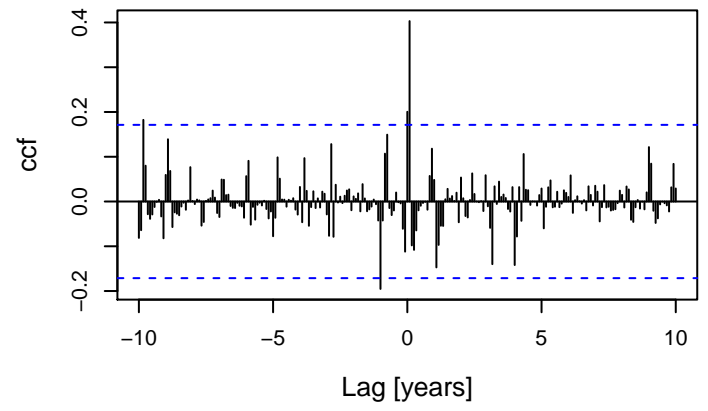

**ccf SM-MERRA Dead Sea**

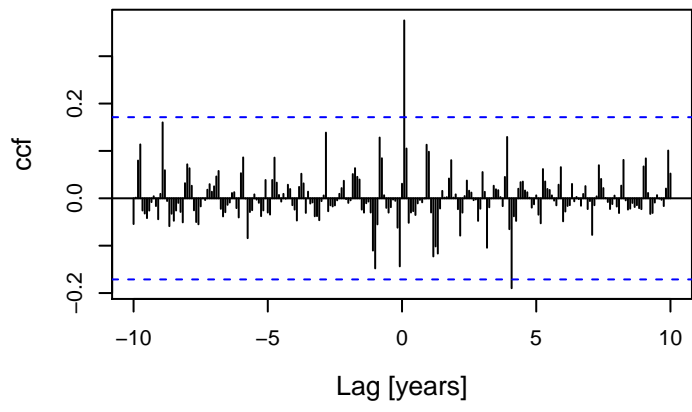

**ccf SM-MERRA Side Wadis**

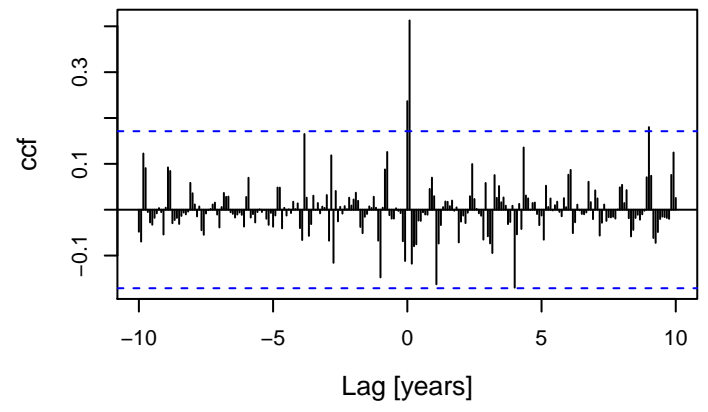

**ccf SM-MERRA Yarmouk**

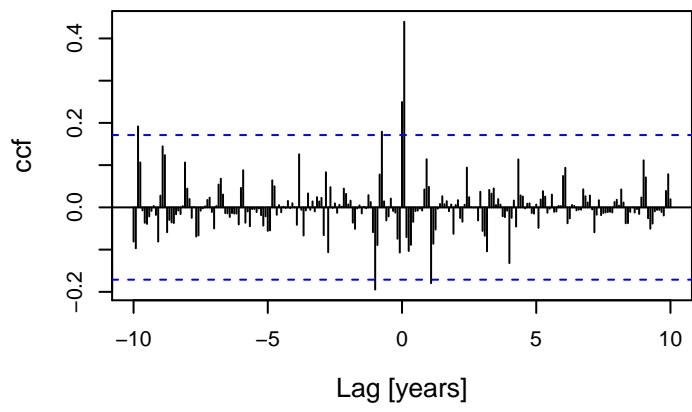

**ccf GWL-TRMM Azraq, AR1-AR4**

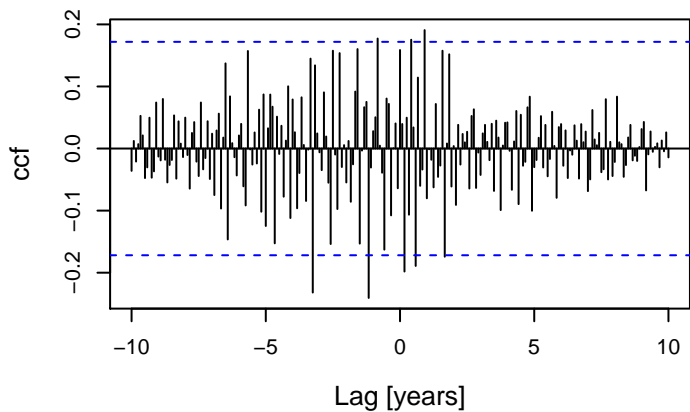

**ccf GWL-TRMM Azraq, AR5**

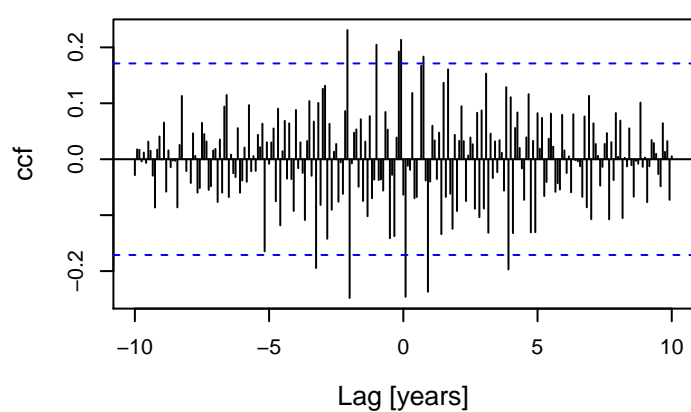

**ccf GWL-TRMM Amman-Zarqa, AZ1-AZ7**

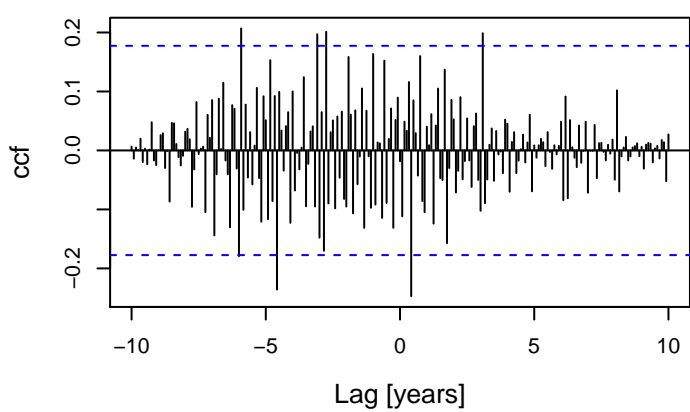

**ccf GWL-TRMM Amman-Zarqa, AZ8**

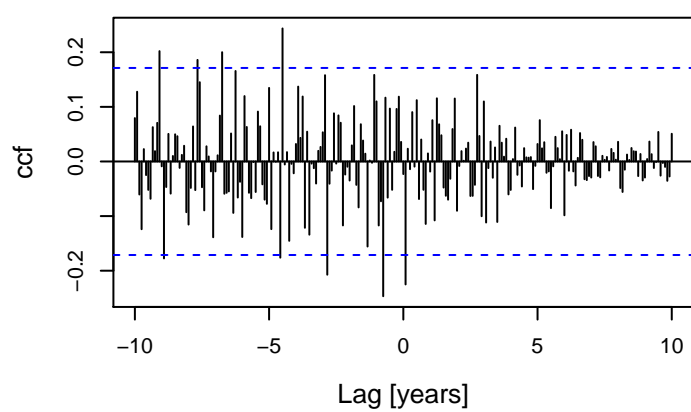

**ccf GWL-TRMM Dead Sea, DS1-DS3**

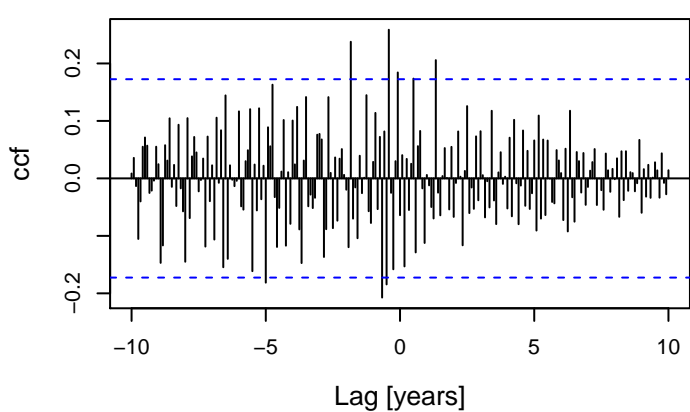

**ccf GWL-TRMM Dead Sea, DS4**

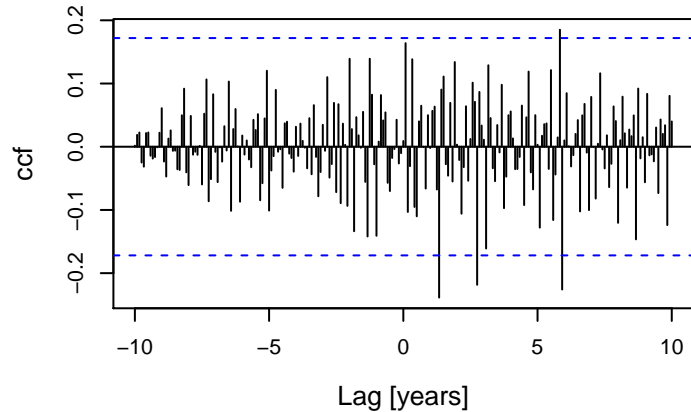

**ccf GWL-TRMM Side Wadis, SW1**

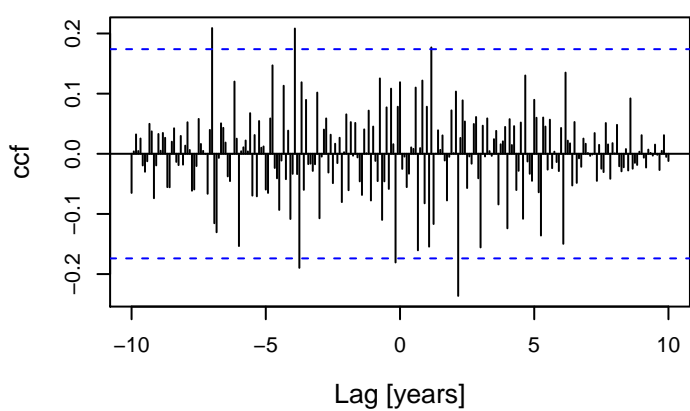

**ccf GWL-TRMM Side Wadis, SW2**

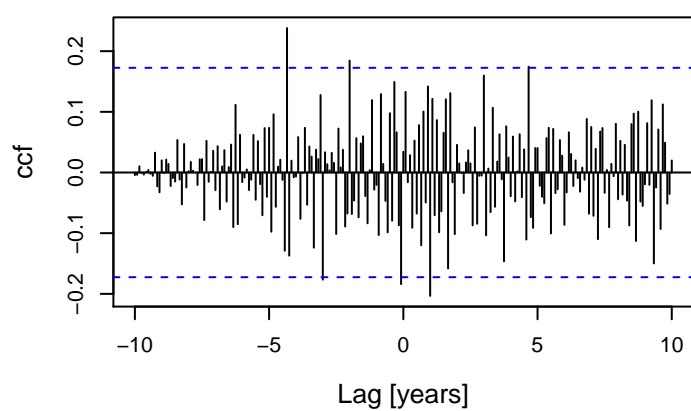

**ccf GWL-TRMM Yarmouk, YM1-YM2**

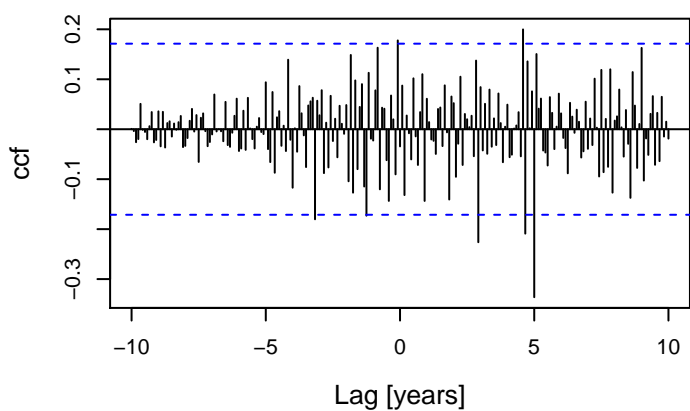

**ccf GWL-TRMM Yarmouk, YM3**

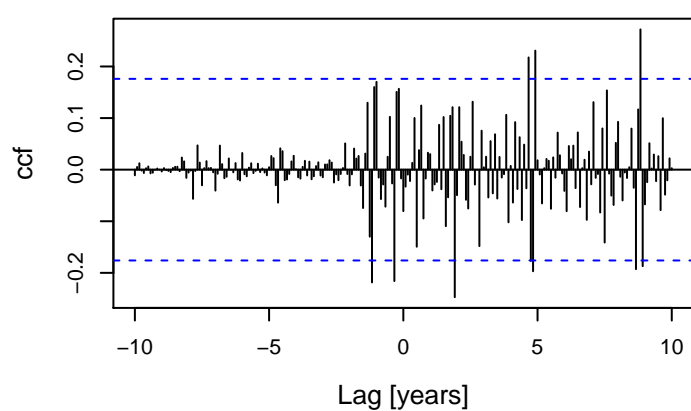

**ccf GWL-MERRA Azraq, AR1-AR4**

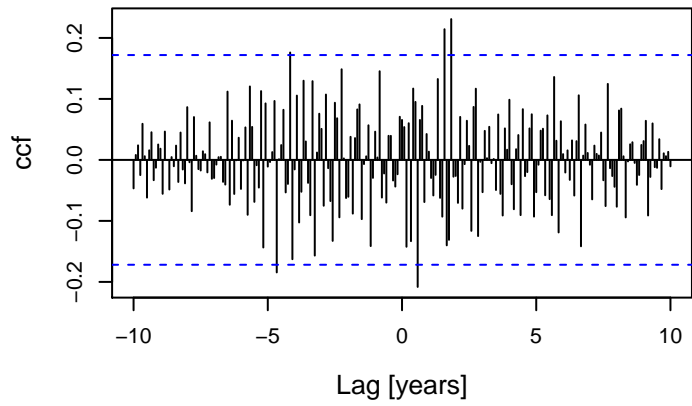

**ccf GWL-MERRA Azraq, AR5**

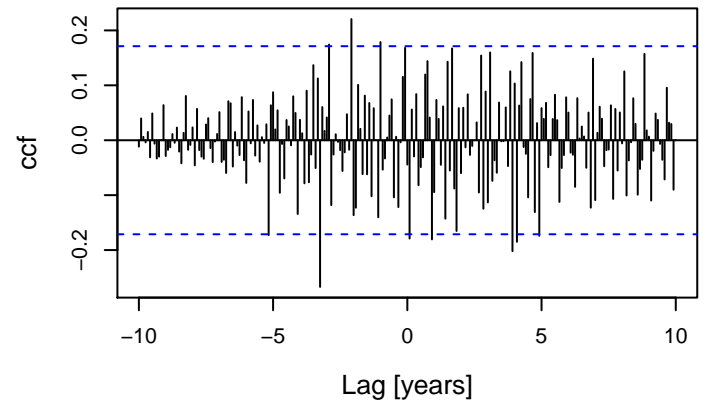

**ccf GWL-MERRA Amman-Zarqa, AZ1-AZ7**

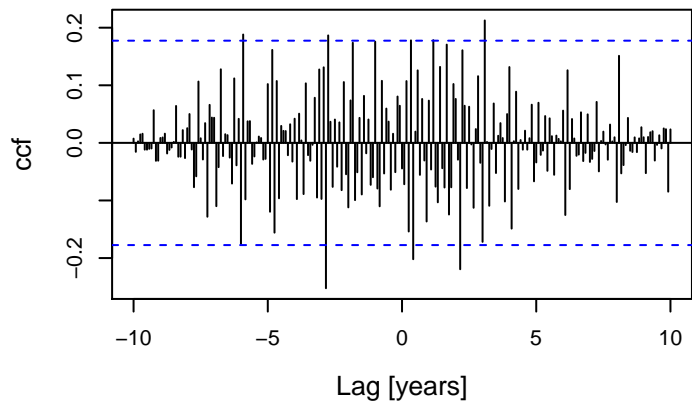

**ccf GWL-MERRA Amman-Zarqa, AZ8**

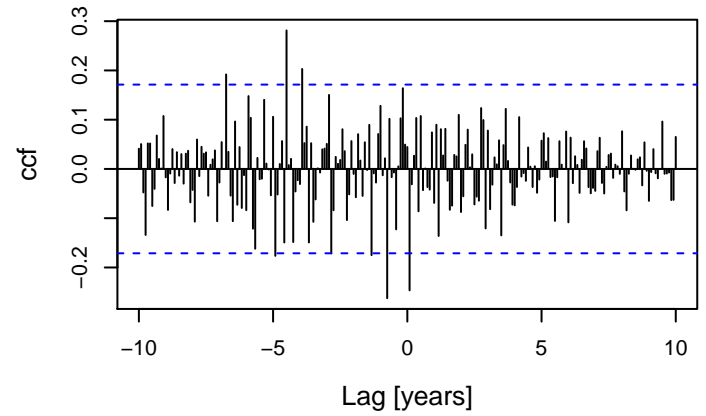

**ccf GWL-MERRA Dead Sea, DS1-DS3**

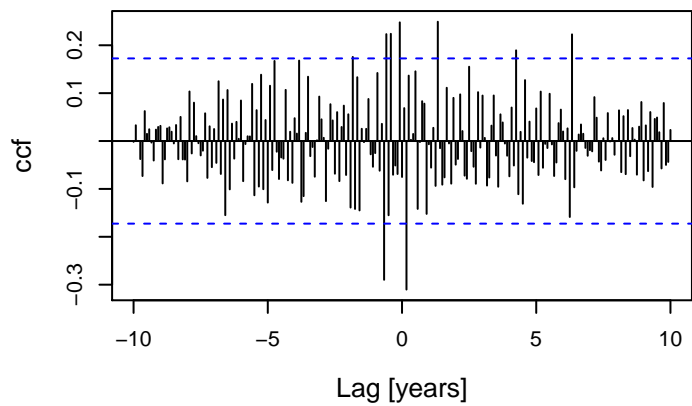

**ccf GWL-MERRA Dead Sea, DS4**

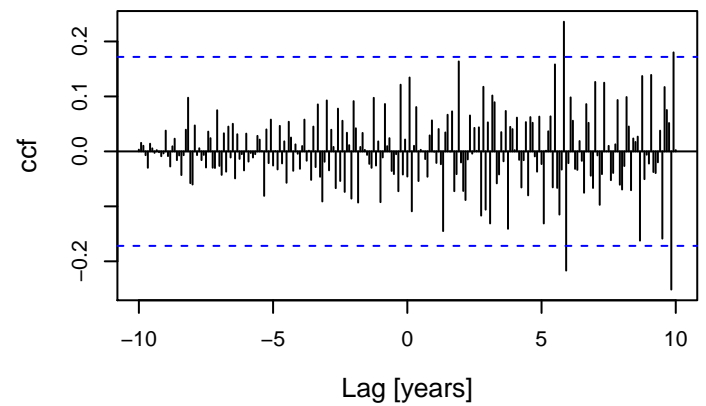

**ccf GWL-MERRA Side Wadis, SW1**

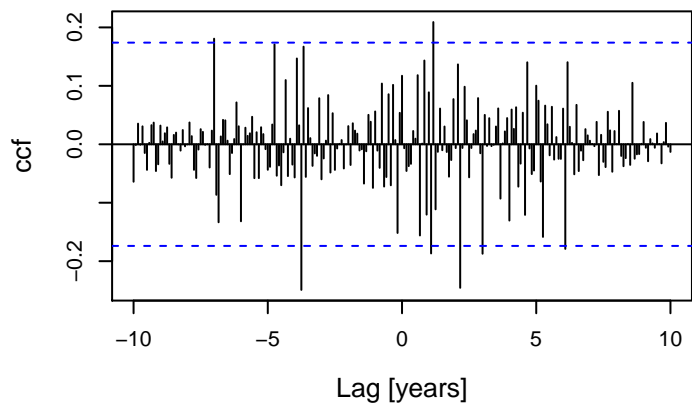

**ccf GWL-MERRA Side Wadis, SW2**

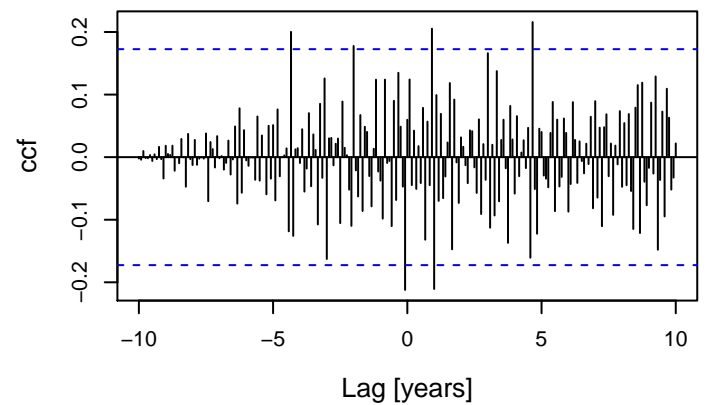

**ccf GWL-MERRA Yarmouk, YM1-YM2**

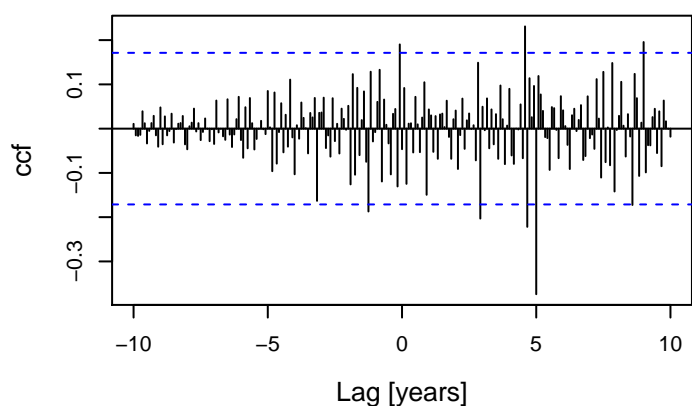

**ccf GWL-MERRA Yarmouk, YM3**

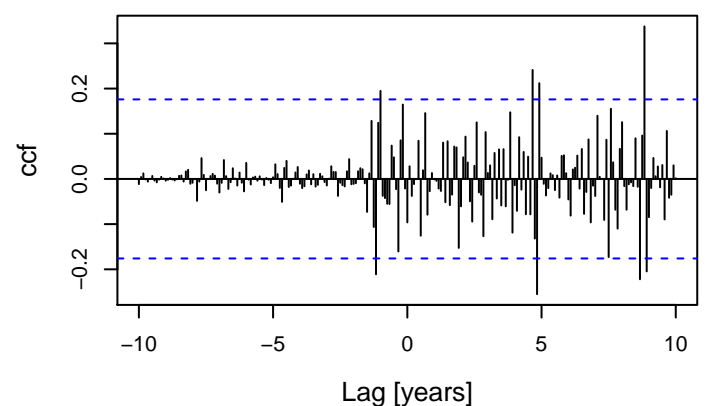



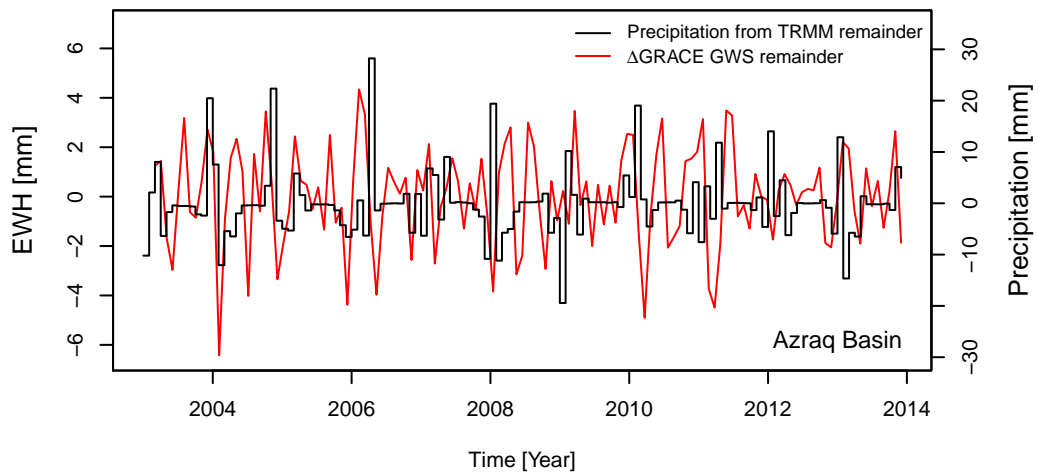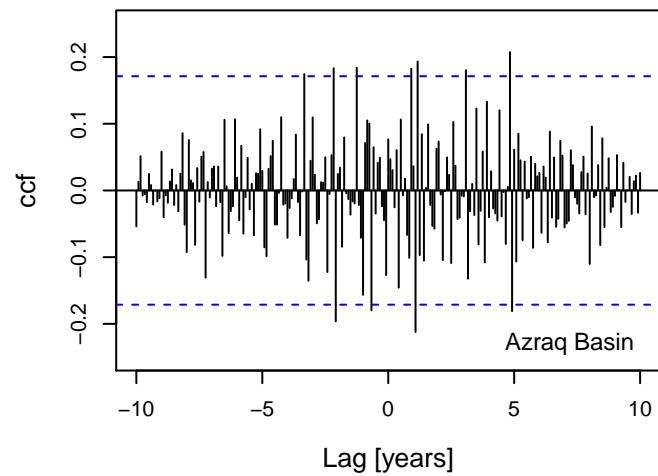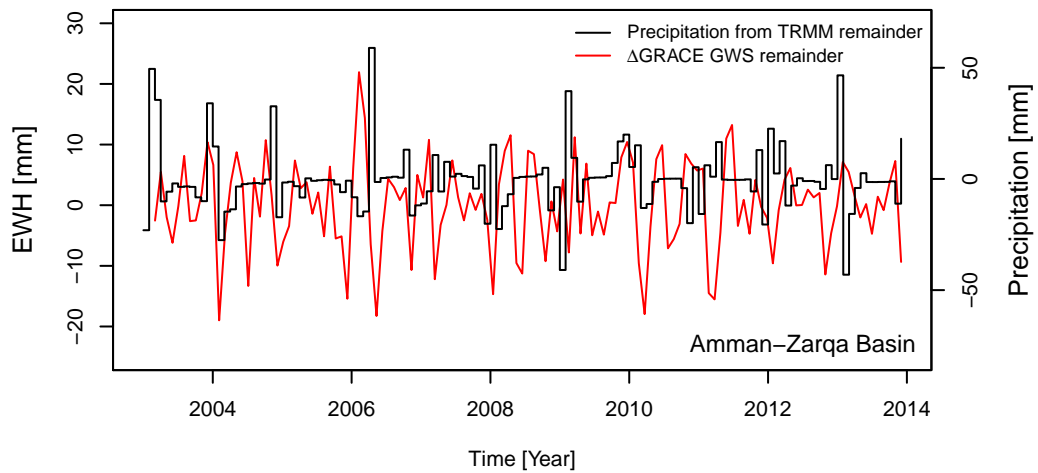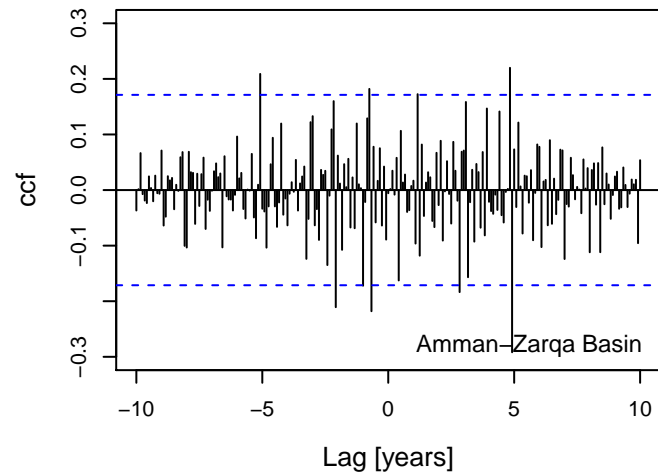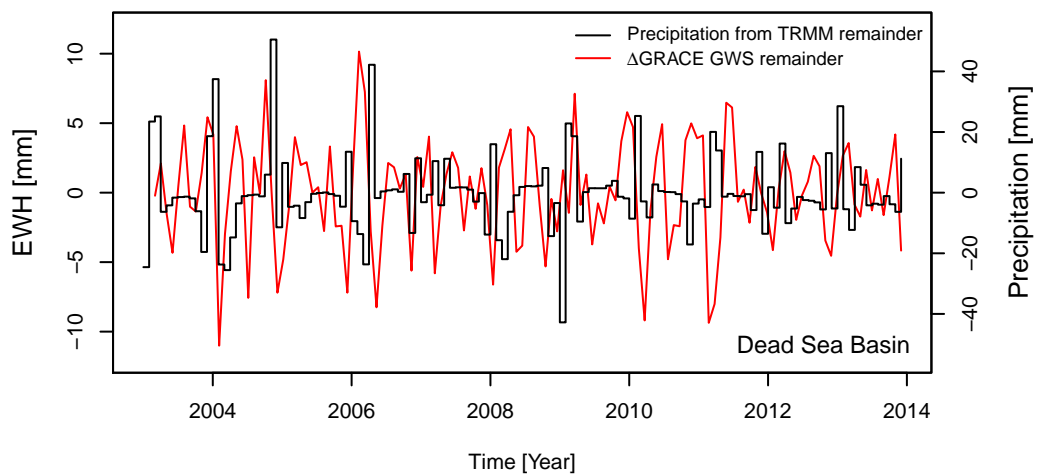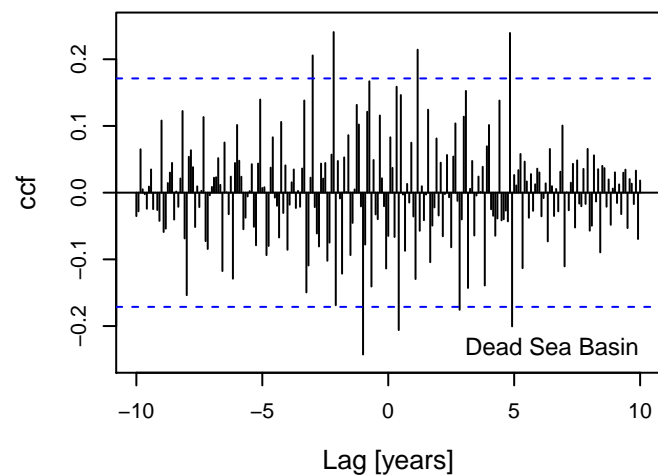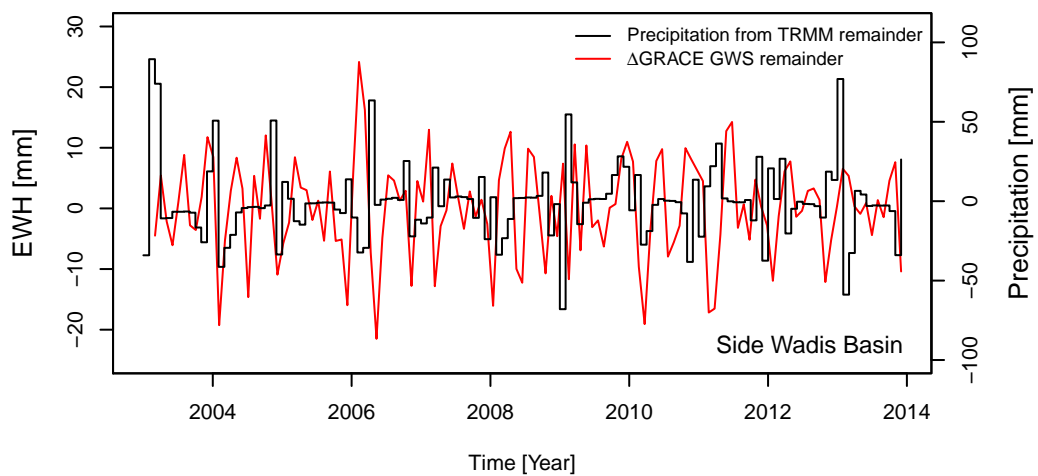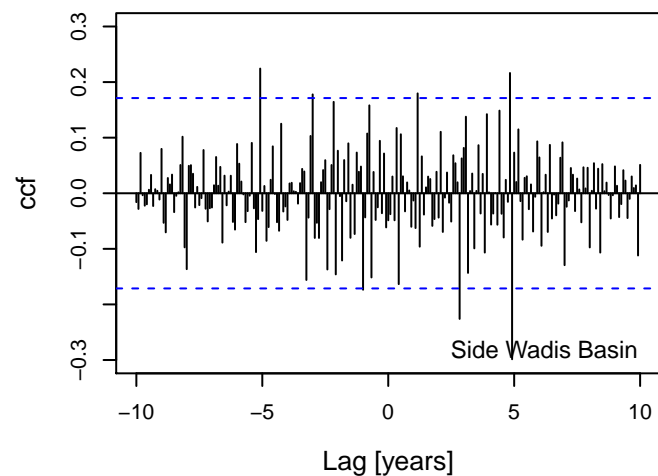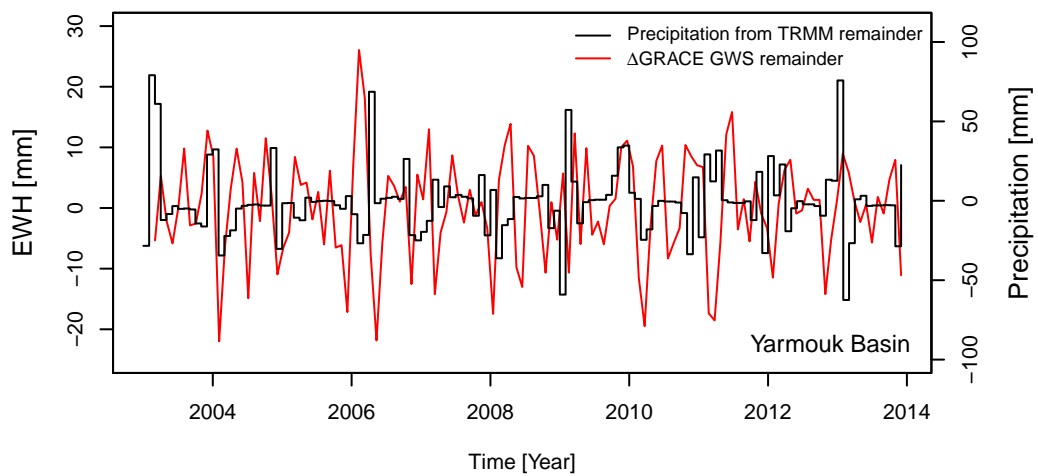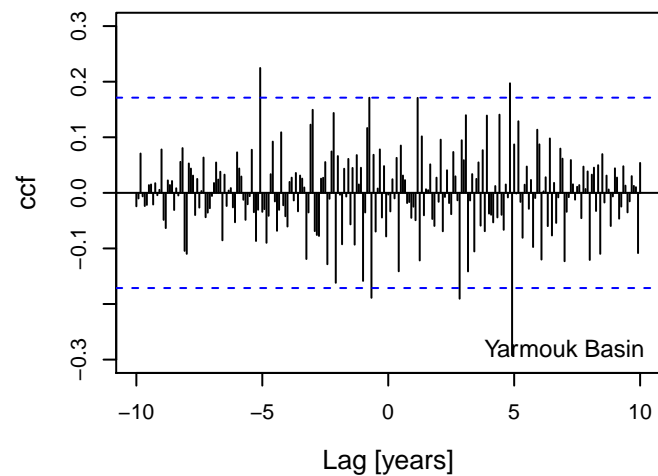

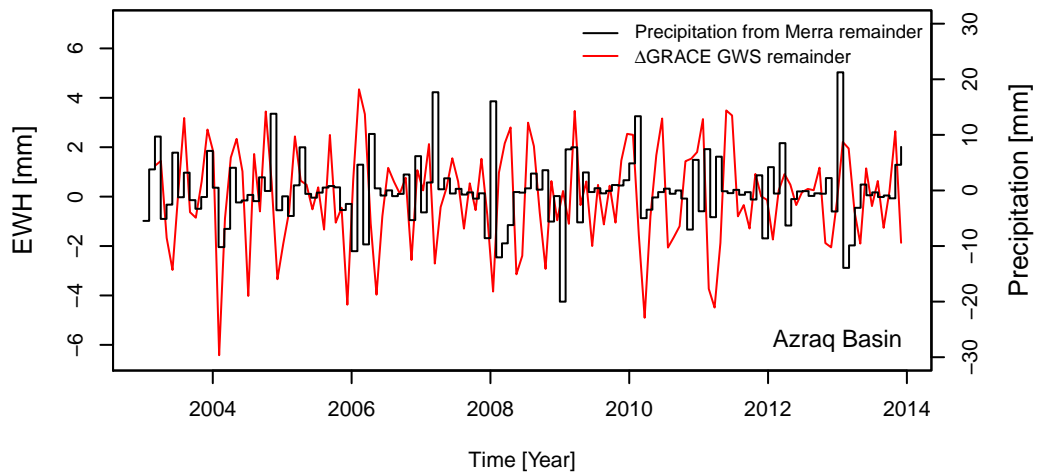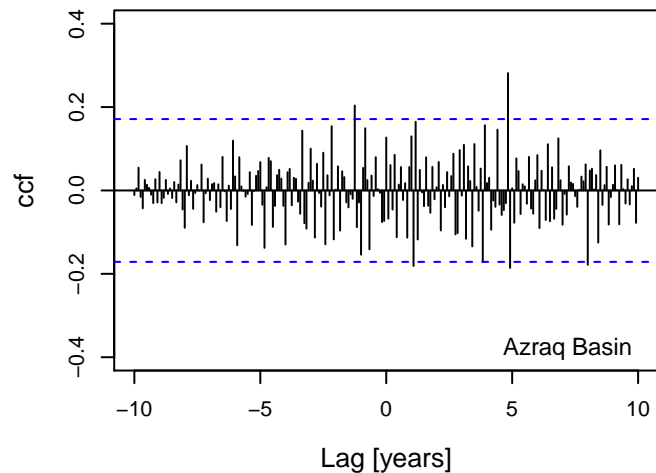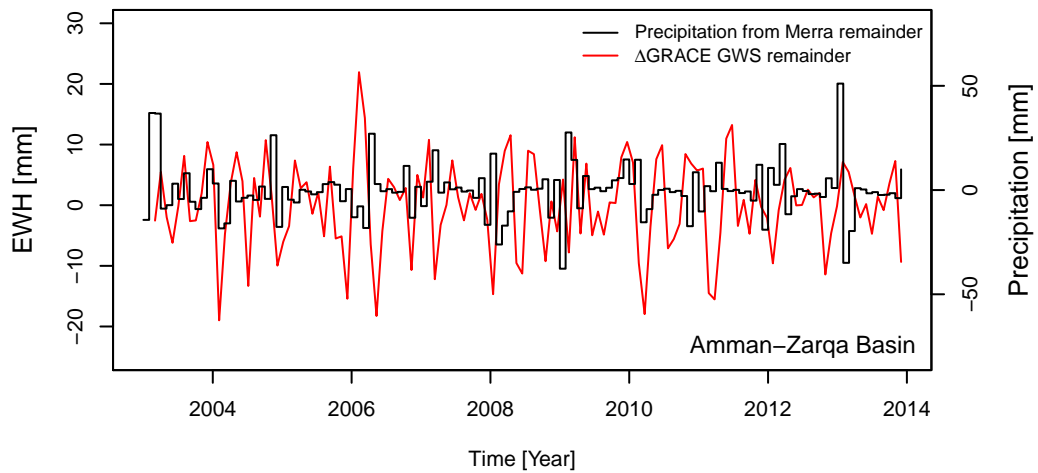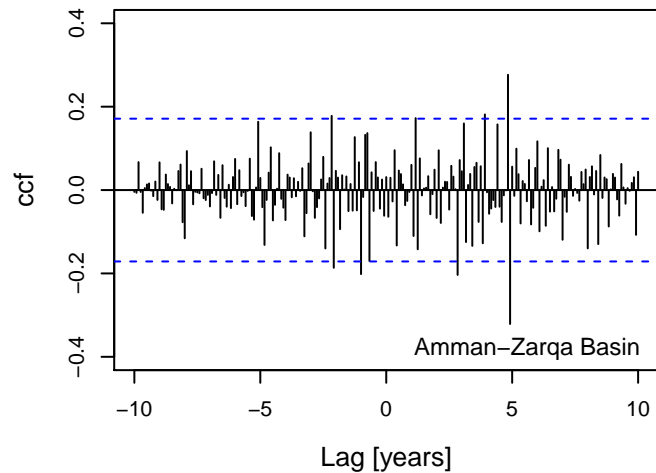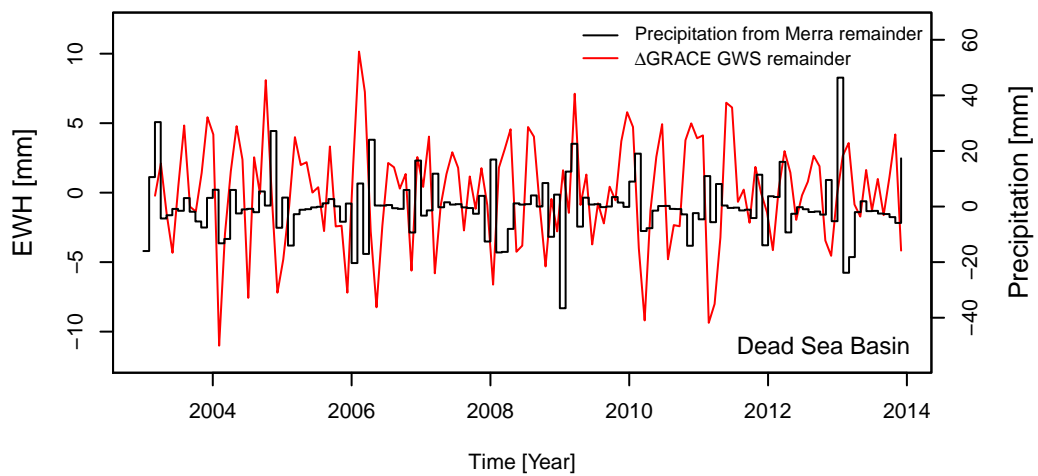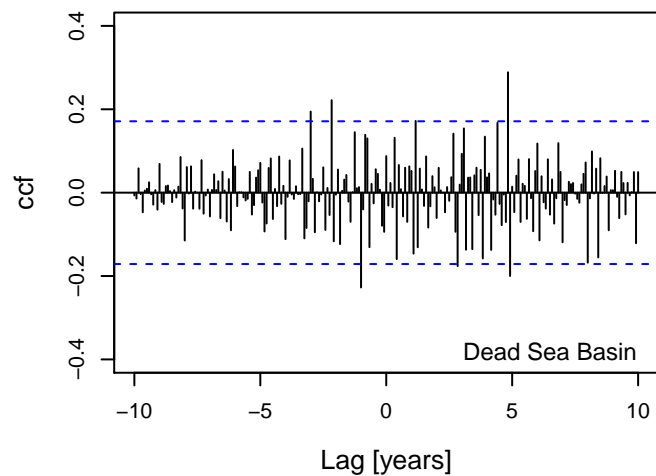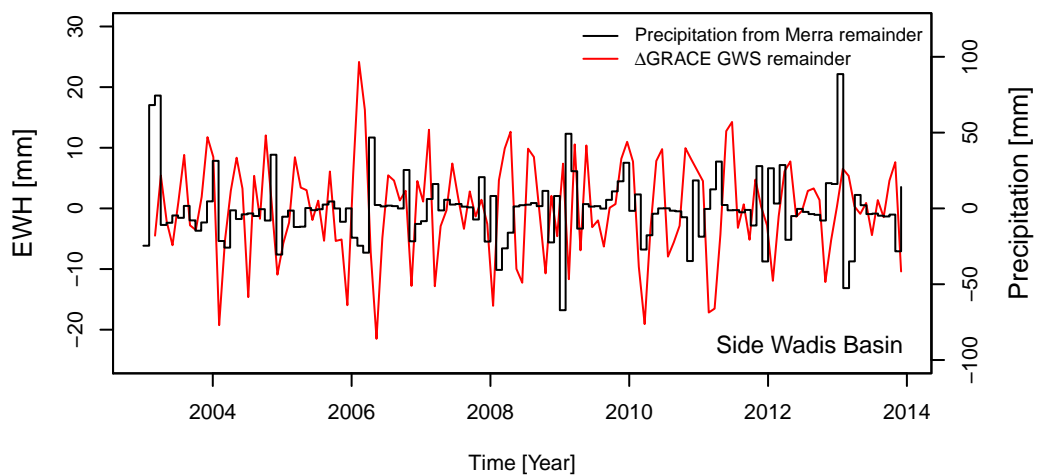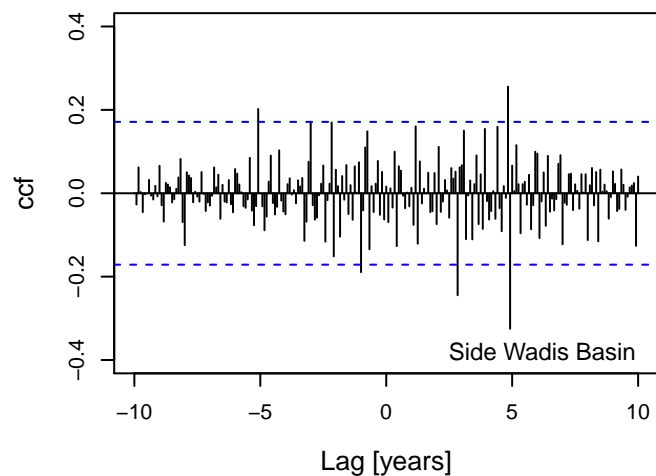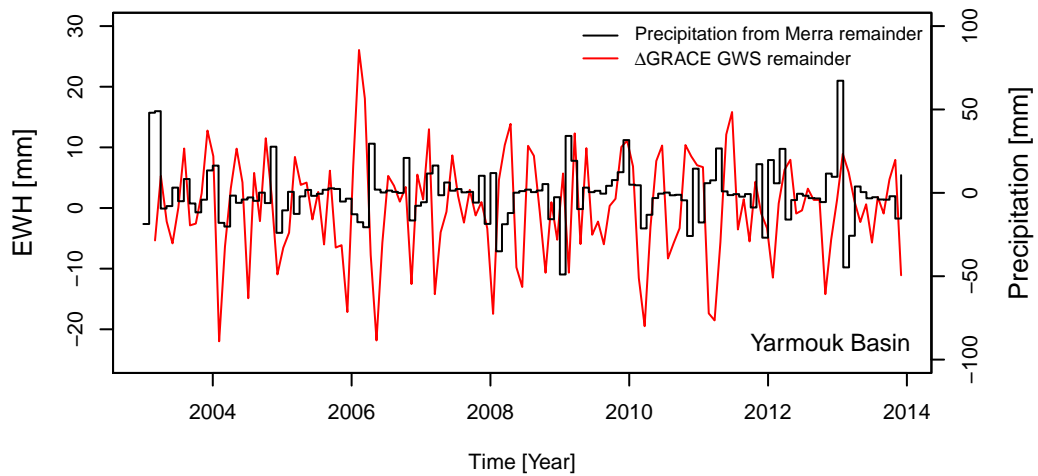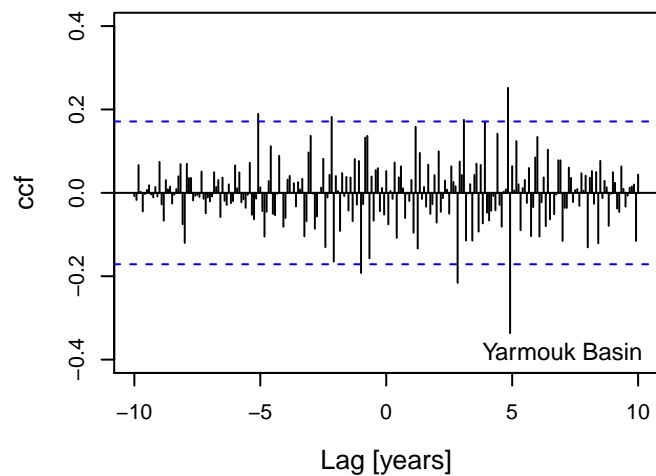

Supplement: 10040_2016_1416_MOESM1_ESM.pdf [file 10040_2016_1416_MOESM1_ESM.pdf]
